# Supplementary material
Source: publisher figshare collection journal article supplement (https://acs.figshare.com/ndownloader/files/3914158)

# Supporting Information

## Direct Synthesis of Pentafluoroethyl Copper from Pentafluoropropionate as an Economical C<sub>2</sub>F<sub>5</sub> Source: Application to Pentafluoroethylation of Arylboronic Acids and Aryl Bromides

Hiroki Serizawa, Kohsuke Aikawa, and Koichi Mikami\*

[\*] Prof. Dr. K. Mikami, Dr. K. Aikawa, and H. Serizawa  
Department of Applied Chemistry  
Graduate School of Science and Engineering  
Tokyo Institute of Technology  
O-okayama, Meguro-ku, Tokyo 152-8552 (Japan)  
Fax: Int. code (+81)3-5734-2776  
E-mail: mikami.k.ab@m.titech.ac.jp

### Table of Contents

|                                                                                                       |            |
|-------------------------------------------------------------------------------------------------------|------------|
| General Information .....                                                                             | page 2     |
| Experimental Procedures                                                                               |            |
| Synthetic Procedure of CuC <sub>2</sub> F <sub>5</sub> Reagent from Ethyl Pentafluoropropionate ..... | page 2     |
| Synthetic Procedure of <i>O</i> -silylated Tetrahedral Intermediate .....                             | page 2-3   |
| Isolation of <i>tert</i> -Butyl Benzoate .....                                                        | page 3     |
| Isolation of <i>tert</i> -Butyl Ethyl Carbonate .....                                                 | page 3     |
| Pentafluoroethylation of Arylboronic Acids .....                                                      | page 4-8   |
| Pentafluoroethylation of Aryl Bromides .....                                                          | page 8-12  |
| Large Scale Operation of Pentafluoroethylation .....                                                  | page 12-13 |
| References .....                                                                                      | page 13    |
| NMR spectra .....                                                                                     | page 14-40 |

## General Information:

$^1\text{H}$ ,  $^{13}\text{C}$ , and  $^{19}\text{F}$  NMR spectra were measured on Bruker AV300M (300 MHz) spectrometers. Chemical shifts of  $^1\text{H}$  NMR were expressed in parts per million relative to the singlet ( $\delta = 7.26$ ) for  $\text{CDCl}_3$ . Chemical shifts of  $^{13}\text{C}$  NMR were expressed in parts per million relative to the central line of the triplet ( $\delta = 77.0$ ) for  $\text{CDCl}_3$ . Chemical shifts of  $^{19}\text{F}$  NMR were expressed in parts per million relative to the singlet ( $\delta = -63.24$ ) for benzotrifluoride (BTF) as an external standard. IR spectra were measured on a JASCO FT/IR-4200 spectrometer. Mass spectra were measured on a JEOL JMS-T100CS (Accu-TOF) spectrometer. Optical rotations were measured on a JASCO P-1020. Potassium *tert*-butoxide (sublimed grade, 99.99% trace metals basis), sodium *tert*-butoxide (purification grade, 97%), lithium *tert*-butoxide (purification grade, 97%), and copper(I) chloride (anhydrous, beads,  $\geq 99.99\%$  trace basis) were purchased from Aldrich.

## Experimental Procedures:

Ethyl pentafluoropropionate **1b** was purchased from TCI. Pentafluoropropionic anhydride **1f** and potassium pentafluoropropionate **1g** were purchased from Aldrich. Perfluoroalkyl ketones and **1a**,<sup>[1]</sup> **1c**,<sup>[1]</sup> **1d**,<sup>[2]</sup> and **1e**<sup>[3]</sup> were synthesized employing published procedures.

### Synthetic Procedure of $\text{CuC}_2\text{F}_5$ Reagent from Ethyl Pentafluoropropionate (Table 2, entry 3)

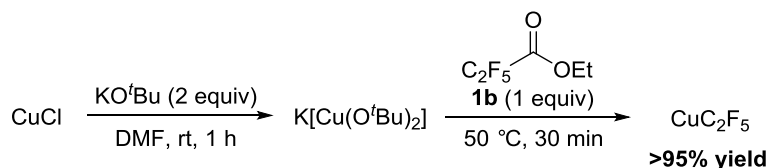

A mixture of  $\text{CuCl}$  (50 mg, 0.50 mmol) and  $\text{KO}^t\text{Bu}$  (112 mg, 1.0 mmol) in DMF or  $\text{DMF-}d_7$  (1 mL) was stirred for 1 hour at room temperature under argon atmosphere. To the mixture was added dropwise ethyl pentafluoropropionate **1b** (74  $\mu\text{L}$ , 0.50 mmol) at 50  $^\circ\text{C}$ . After the reaction mixture was stirred for 30 min,  $\text{CuC}_2\text{F}_5$  species was observed by  $^{19}\text{F}$  NMR analysis using benzotrifluoride as an internal standard (>95% yield).

$^{13}\text{C}$  NMR (75 MHz,  $\text{DMF-}d_7$ )  $\delta$  124.6 (qt,  $J_{\text{CF}} = 279.8, 30.2$  Hz,  $\text{CF}_3$ ), 140.8 (tq,  $J_{\text{CF}} = 280.9, 49.3$  Hz,  $\text{CF}_2$ );  $^{19}\text{F}$  NMR (282 MHz,  $\text{DMF-}d_7$ )  $\delta$  -84.4 (s, 3F), -111.7 (s, 2F).

### Synthetic Procedure of (1-(*tert*-Butoxy)-2,2,3,3,3-pentafluoro-1-phenylpropoxy)trimethylsilane (**2**) (Scheme 1, Eq. 1)

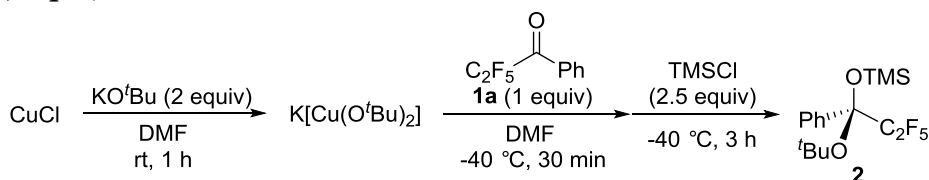

A mixture of  $\text{CuCl}$  (50 mg, 0.50 mmol) and  $\text{KO}^t\text{Bu}$  (112 mg, 1.0 mmol) in DMF (1 mL) was stirred for 1 hour at room temperature under argon atmosphere. To the mixture was added dropwise 2,2,3,3,3-pentafluoro-1-phenylpropan-1-one **1a** (112 mg, 0.50 mmol) at -40  $^\circ\text{C}$ . After the reaction mixture was stirred for 30 min,  $\text{TMSCl}$  (108  $\mu\text{L}$ , 1.25 mmol) was added dropwise at the same temperature. After stirring for 3 hours, the reaction mixture was quenched by  $\text{H}_2\text{O}$  (5 mL) at 0  $^\circ\text{C}$ . The organic layer was separated, and aqueous layer was extracted with  $\text{Et}_2\text{O}$  (10 mL  $\times$  3). The

combined organic layer was washed with brine (10 mL), dried over Na<sub>2</sub>SO<sub>4</sub>, and evaporated. The resulting crude product was purified by silica-gel column chromatography (Hexane only) to give the product **2** (132 mg, 71% yield) as a colorless liquid.

<sup>1</sup>H NMR (300 MHz, CDCl<sub>3</sub>) δ 0.37 (s, 9H), 1.29 (s, 9H), 7.37-7.41 (m, 3H), 7.64-7.67 (m, 2H); <sup>13</sup>C NMR (75 MHz, CDCl<sub>3</sub>) δ 2.56-2.58 (m), 30.6, 77.9, 100.2 (dd, *J*<sub>CF</sub> = 26.2, 24.7 Hz), 112.1 (tq, *J*<sub>CF</sub> = 263.6, 33.8 Hz, CF<sub>2</sub>), 119.2 (qt, *J*<sub>CF</sub> = 285.9, 35.9 Hz, CF<sub>3</sub>), 127.4, 128.5, 129.1, 139.1; <sup>19</sup>F NMR (282 MHz, CDCl<sub>3</sub>) δ -77.1 (s, 3F), -119.9 (d, *J*<sub>FF</sub> = 70.8 Hz, 1F), -119.9 (d, *J*<sub>FF</sub> = 71.0 Hz, 1F); HRMS (ESI-TOF) calcd for C<sub>16</sub>H<sub>23</sub>F<sub>5</sub>NaO<sub>2</sub>Si [M+Na]<sup>+</sup>: 393.1285, found: 393.1301; FT-IR (neat, cm<sup>-1</sup>) 1180, 1227, 1257, 1653, 2979, 3065.

### Isolation of *tert*-Butyl Benzoate (**3**)

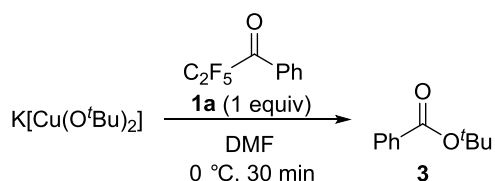

A mixture of CuCl (50 mg, 0.50 mmol) and KO<sup>t</sup>Bu (112 mg, 1.0 mmol) in DMF (1 mL) was stirred for 1 hour at room temperature under argon atmosphere. To the mixture was added dropwise 2,2,3,3,3-pentafluoro-1-phenylpropan-1-one **1a** (112 mg, 0.50 mmol) at 0 °C. After the reaction mixture was stirred for 30 min, and then quenched by 1M HCl aq. (5 mL) at 0 °C. The organic layer was separated, and aqueous layer was extracted with Et<sub>2</sub>O (10 mL × 3). The combined organic layer was washed with brine (10 mL), dried over Na<sub>2</sub>SO<sub>4</sub>, and evaporated. The resulting crude product was purified by silica-gel column chromatography (Hexane/AcOEt = 10/1) to give *tert*-butyl benzoate **3** (83.9 mg, 94% yield) as colorless liquid. *tert*-Butyl benzoate **3** is known compound, the following data is identical to those given in corresponding literature.<sup>[4]</sup>

<sup>1</sup>H NMR (300 MHz, CDCl<sub>3</sub>) δ 1.60 (s, 9H), 7.38-7.44 (m, 2H), 7.49-7.55 (m, 1H), 7.98-8.02 (m, 2H); <sup>13</sup>C NMR (75 MHz, CDCl<sub>3</sub>) δ 28.1, 80.89, 128.1, 129.4, 132.0, 132.4, 165.7.

### Isolation of *tert*-Butyl Ethyl Carbonate (**4**)

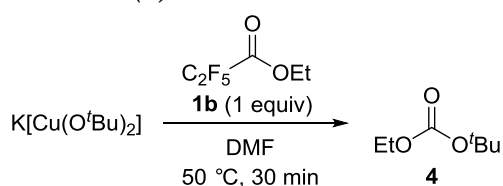

A mixture of CuCl (50 mg, 0.50 mmol) and KO<sup>t</sup>Bu (112 mg, 1.0 mmol) in DMF (1 mL) was stirred for 1 hour at room temperature under argon atmosphere. To the mixture was added dropwise ethyl pentafluoropropionate **1b** (74 μL, 0.50 mmol) at 50 °C. After the reaction mixture was stirred for 30 min, and then quenched by 1M HCl aq. (5 mL) at 0 °C. The organic layer was separated, and aqueous layer was extracted with Et<sub>2</sub>O (10 mL × 3). The combined organic layer was washed with brine (10 mL), dried over Na<sub>2</sub>SO<sub>4</sub>, and evaporated. The resulting crude product was purified by silica-gel column chromatography (Pentane only) to give *tert*-butyl ethyl carbonate **4** (54.3 mg, 74% yield) as a colorless liquid. *tert*-Butyl ethyl carbonate **4** is known compound, the following data is identical to those given in corresponding literature.<sup>[5]</sup>

<sup>1</sup>H NMR (300 MHz, CDCl<sub>3</sub>) δ 1.24 (t, *J* = 7.1 Hz, 3H), 1.44 (s, 9H), 4.07 (q, *J* = 7.1 Hz, 2H); <sup>13</sup>C NMR (75 MHz, CDCl<sub>3</sub>) δ 14.2, 27.7, 62.8, 81.6, 153.5.

### Pentafluoroethylation of Arylboronic Acids

Boronic acid: **6a**, **6d-h**, and **6j** were purchased from Aldrich. **6b-6c** and **6i** were purchased from TCI. **6k** was synthesized employing published procedure.<sup>[6]</sup>

### Typical Procedure for Pentafluoroethylation of Arylboronic Acids with $\text{CuC}_2\text{F}_5$ Reagent (Scheme 2)

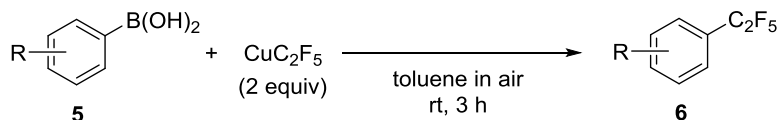

To a solution of arylboronic acid **5** (0.1 mmol) in toluene (1 mL) was added  $\text{CuC}_2\text{F}_5$  reagent (DMF solution 0.4-0.5 M, 400-500  $\mu\text{L}$ , 0.2 mmol, prepared by  $\text{CuCl}$ ,  $\text{KO}^t\text{Bu}$ , and ethyl pentafluoropropionate in DMF) neutralized by  $\text{Et}_3\text{N}\cdot 3\text{HF}$  (13  $\mu\text{L}$ , 0.08 mmol) at room temperature in the air. After stirring for 3 hours, the reaction mixture was quenched by 1M  $\text{HCl}$  aq. (5 mL). The organic layer was separated, and the aqueous layer was extracted with  $\text{Et}_2\text{O}$  (5 mL  $\times$  3). The combined organic layer was washed with brine (10 mL), dried over  $\text{Na}_2\text{SO}_4$ , and evaporated. The resulting crude product was purified by silica-gel column chromatography to give the pentafluoroethylated products **6**.

### Optimization of Reaction Conditions for Arylboronic Acid **5c** Bearing Electron-Donating Substituent

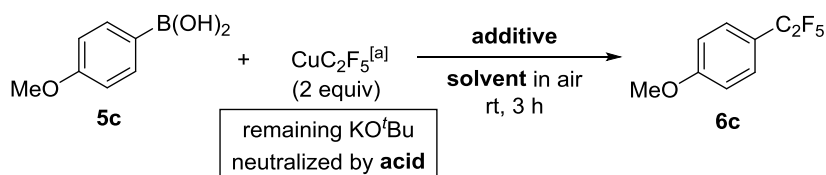

| entry            | acid                                              | additive                        | solvent | yield (%) <sup>[b]</sup> |
|------------------|---------------------------------------------------|---------------------------------|---------|--------------------------|
| 1                | $\text{Et}_3\text{N}\cdot\text{HCl}$ (2.4 equiv)  | -                               | -       | 71                       |
| 2                | $\text{Et}_3\text{N}\cdot\text{HCl}$ (2.4 equiv)  | -                               | DMF     | 49                       |
| 3                | $\text{Et}_3\text{N}\cdot\text{HCl}$ (2.4 equiv)  | -                               | MeCN    | 38                       |
| 4                | $\text{Et}_3\text{N}\cdot\text{HCl}$ (2.4 equiv)  | -                               | toluene | 63                       |
| 5                | $\text{Et}_3\text{N}\cdot 3\text{HF}$ (0.8 equiv) | -                               | toluene | 97(95 <sup>[c]</sup> )   |
| 6                | $\text{HCl}$ in $\text{Et}_2\text{O}$ (2.4 equiv) | -                               | toluene | 54                       |
| 7 <sup>[d]</sup> | $\text{Et}_3\text{N}\cdot 3\text{HF}$ (0.6 equiv) | -                               | toluene | 90                       |
| 8 <sup>[e]</sup> | $\text{Et}_3\text{N}\cdot 3\text{HF}$ (0.5 equiv) | -                               | toluene | 80                       |
| 9                | $\text{Et}_3\text{N}\cdot 3\text{HF}$ (0.8 equiv) | $\text{Et}_3\text{N}$ (4 equiv) | toluene | 95                       |
| 10               | $\text{Et}_3\text{N}\cdot 3\text{HF}$ (0.8 equiv) | $\text{KCl}$ (2 equiv)          | toluene | 82                       |
| 11               | $\text{Et}_3\text{N}\cdot 3\text{HF}$ (0.8 equiv) | $\text{KCl}$ (4 equiv)          | toluene | 72                       |
| 12               | $\text{Et}_3\text{N}\cdot 3\text{HF}$ (0.8 equiv) | $\text{KF}$ (2 equiv)           | toluene | 89                       |
| 13               | $\text{Et}_3\text{N}\cdot 3\text{HF}$ (0.8 equiv) | $\text{KF}$ (4 equiv)           | toluene | 82                       |

[a]  $\text{CuC}_2\text{F}_5$  reagent neutralized by acid before being used in the reaction.

[b] Determined by  $^{19}\text{F}$  NMR analysis using BTF as an internal standard.

[c] Isolated yield. [d]  $\text{CuC}_2\text{F}_5$  (1.5 equiv) was used. [e]  $\text{CuC}_2\text{F}_5$  (1.2 equiv) was used.

### 1-Nitro-4-(pentafluoroethyl)benzene (6a)

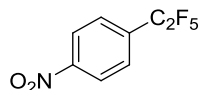

The title compound was obtained from 4-nitrophenylboronic acid **5a** following the procedure above. The yield of the compound (84% yield) was determined by  $^{19}\text{F}$  NMR analysis using benzotrifluoride as an internal standard. Purification by silica-gel column chromatography (pentane/ $\text{Et}_2\text{O}$  = 12/1) gave the compound (19.6 mg, 81% yield) as a yellow liquid.

$^1\text{H}$  NMR (300 MHz,  $\text{CDCl}_3$ )  $\delta$  7.83 (d,  $J$  = 8.8 Hz, 2H), 8.38 (d,  $J$  = 9.0 Hz, 2H);  $^{13}\text{C}$  NMR (75 MHz,  $\text{CDCl}_3$ )  $\delta$  112.6 (tq,  $J_{\text{CF}}$  = 253.7, 38.6 Hz,  $\text{CF}_2$ ), 118.7 (qt,  $J_{\text{CF}}$  = 284.4, 38.0 Hz,  $\text{CF}_3$ ), 124.0, 128.0 (t,  $J_{\text{CF}}$  = 5.8 Hz), 134.6 (t,  $J_{\text{CF}}$  = 24.2 Hz), 150.2;  $^{19}\text{F}$  NMR (282 MHz,  $\text{CDCl}_3$ )  $\delta$  -84.5 (s, 3F), -115.4 (s, 2F); HRMS (ESI-TOF) calcd for  $\text{C}_8\text{H}_3\text{F}_5\text{NO}_2$   $[\text{M}-\text{H}]^-$ : 240.0084, found: 240.0096; FT-IR (neat,  $\text{cm}^{-1}$ ) 1098, 1153, 1208, 1536, 1617, 3091.

### 1-(Pentafluoroethyl)-4-(trifluoromethyl)benzene (6b)

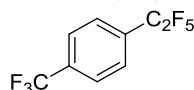

The title compound was obtained from 4-trifluoromethylphenylboronic acid **5b** following the procedure above. The yield (97% yield) was determined by  $^{19}\text{F}$  NMR analysis using (trifluoromethoxy)benzene as an internal standard. Purification by silica-gel column chromatography (pentane only) gave the compound as a colorless liquid in moderate yield (15.0 mg, 57% yield), because of the low boiling point compound.

$^1\text{H}$  NMR (300 MHz,  $\text{CDCl}_3$ )  $\delta$  7.75 (d,  $J$  = 8.8 Hz, 2H), 7.79 (d,  $J$  = 8.8 Hz, 2H);  $^{13}\text{C}$  NMR (75 MHz,  $\text{CDCl}_3$ )  $\delta$  112.9 (tq,  $J_{\text{CF}}$  = 254.4, 38.5 Hz,  $\text{CF}_2$ ), 118.9 (qt,  $J_{\text{CF}}$  = 286.0, 38.6 Hz,  $\text{CF}_3$ ), 123.4 (q,  $J_{\text{CF}}$  = 272.7 Hz, Ar- $\text{CF}_3$ ), 125.9 (q,  $J_{\text{CF}}$  = 3.7 Hz), 127.2 (t,  $J_{\text{CF}}$  = 6.2 Hz), 132.3 (t,  $J_{\text{CF}}$  = 24.1 Hz), 134.2 (q,  $J_{\text{CF}}$  = 33.1 Hz);  $^{19}\text{F}$  NMR (282 MHz,  $\text{CDCl}_3$ )  $\delta$  -63.4 (s, 3F), -84.8 (s, 3F), -115.5 (s, 2F); HRMS (ESI-TOF) calcd for  $\text{C}_9\text{H}_3\text{F}_8$   $[\text{M}-\text{H}]^-$ : 263.0107, found: 263.0107; FT-IR (neat,  $\text{cm}^{-1}$ ) 910, 1213, 1635, 3154.

### 1-Methoxy-4-(pentafluoroethyl)benzene (6c)

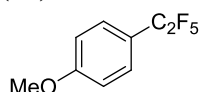

The title compound was obtained from 4-methoxyphenylboronic acid **5c** following the procedure above. The yield (97% yield) was determined by  $^{19}\text{F}$  NMR analysis using benzotrifluoride as an internal standard. Purification by silica-gel column chromatography (pentane only) gave the compound (21.6 mg, 95% yield) as a pale yellow liquid.

$^1\text{H}$  NMR (300 MHz,  $\text{CDCl}_3$ )  $\delta$  3.86 (s, 3H), 6.99 (d,  $J$  = 9.0 Hz, 2H), 7.52 (d,  $J$  = 8.8 Hz, 2H);  $^{13}\text{C}$  NMR (75 MHz,  $\text{CDCl}_3$ )  $\delta$  55.4, 113.6 (tq,  $J_{\text{CF}}$  = 251.6, 38.0 Hz,  $\text{CF}_2$ ), 114.1, 119.2 (qt,  $J_{\text{CF}}$  = 284.0, 40.0 Hz,  $\text{CF}_3$ ), 120.7 (t,  $J_{\text{CF}}$  = 24.5 Hz), 128.0 (t,  $J_{\text{CF}}$  = 5.9 Hz), 162.2;  $^{19}\text{F}$  NMR (282 MHz,  $\text{CDCl}_3$ )  $\delta$  -85.0 (s, 3F), -113.9 (s, 2F); HRMS (ESI-TOF) calcd for  $\text{C}_9\text{H}_6\text{F}_5\text{O}$   $[\text{M}-\text{H}]^-$ : 225.0339, found: 225.0347; FT-IR (neat,  $\text{cm}^{-1}$ ) 1093, 1206, 1263, 1618, 2844, 3012.

#### 4-(Pentafluoroethyl)dibenzo[b,d]furan (6d)

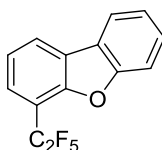

The title compound was obtained from dibenzo[b,d]furan-4-ylboronic acid **5d** following the procedure above. The yield (93% yield) was determined by  $^{19}\text{F}$  NMR analysis using benzotrifluoride as an internal standard. Purification by silica-gel column chromatography (hexane only) gave the compound (26.9 mg, 94% yield) as a white solid.

$^1\text{H}$  NMR (300 MHz,  $\text{CDCl}_3$ )  $\delta$  7.37-7.46 (m, 2H), 7.50-7.56 (m, 1H), 7.64-7.69 (m, 2H), 7.93-7.96 (m, 1H), 8.10 (d,  $J = 7.8$  Hz, 1H);  $^{13}\text{C}$  NMR (75 MHz,  $\text{CDCl}_3$ )  $\delta$  112.1, 113.1 (t,  $J_{\text{CF}} = 25.1$  Hz), 113.3 (tq,  $J_{\text{CF}} = 253.4, 39.2$  Hz,  $\text{CF}_2$ ), 119.4 (qt,  $J_{\text{CF}} = 284.7, 38.6$  Hz,  $\text{CF}_3$ ), 120.7, 122.5, 122.8, 123.4, 124.5, 125.4 (t,  $J_{\text{CF}} = 7.5$  Hz), 126.2, 128.2, 152.9 (t,  $J_{\text{CF}} = 3.0$  Hz), 156.4;  $^{19}\text{F}$  NMR (282 MHz,  $\text{CDCl}_3$ )  $\delta$  -84.5 (s, 3F), -113.3 (s, 2F); HRMS (ESI-TOF) calcd for  $\text{C}_{14}\text{H}_7\text{F}_5\text{NaO}$   $[\text{M}+\text{Na}]^+$ : 309.0315, found: 309.0310; FT-IR (neat,  $\text{cm}^{-1}$ ) 1184, 1200, 1425, 1610, 3077.

#### 1-(*tert*-Butyl)-4-(pentafluoroethyl)benzene (6e)

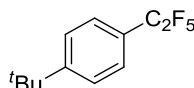

The title compound was obtained from 4-*tert*-butylphenylboronic acid **5e** following the procedure above. The yield (96% yield) was determined by  $^{19}\text{F}$  NMR analysis using benzotrifluoride as an internal standard. Purification by silica-gel column chromatography (pentane only) gave the compound (23.4 mg, 93% yield) as a colorless liquid.

$^1\text{H}$  NMR (300 MHz,  $\text{CDCl}_3$ )  $\delta$  1.38 (s, 9H), 7.53-7.59 (m, 4H);  $^{13}\text{C}$  NMR (75 MHz,  $\text{CDCl}_3$ )  $\delta$  31.1, 34.9, 113.7 (tq,  $J_{\text{CF}} = 251.5, 38.0$  Hz,  $\text{CF}_2$ ), 119.3 (qt,  $J_{\text{CF}} = 283.9, 39.5$  Hz,  $\text{CF}_3$ ), 125.7, 125.9, 126.2 (t,  $J_{\text{CF}} = 5.9$  Hz), 155.4 (t,  $J_{\text{CF}} = 1.5$  Hz);  $^{19}\text{F}$  NMR (282 MHz,  $\text{CDCl}_3$ )  $\delta$  -84.9 (s, 3F), -114.6 (s, 2F); HRMS (ESI-TOF) calcd for  $\text{C}_{12}\text{H}_{14}\text{F}_5$   $[\text{M}+\text{H}]^+$ : 253.1016, found: 253.1012; FT-IR (neat,  $\text{cm}^{-1}$ ) 1113, 1207, 1616, 2968, 3064.

#### 3-(Pentafluoroethyl)quinoline (6f)

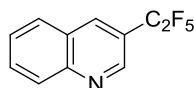

The title compound was obtained from quinolin-3-ylboronic acid **5f** following the procedure above. The yield of the compound (83% yield) was determined by  $^{19}\text{F}$  NMR analysis using benzotrifluoride as an internal standard. Purification by silica-gel column chromatography (hexane/AcOEt = 9/1) gave the compound (21.1 mg, 85% yield) as a pale yellow liquid.

$^1\text{H}$  NMR (300 MHz,  $\text{CDCl}_3$ )  $\delta$  7.64-7.69 (m, 1H), 7.84-7.94 (m, 1H), 7.93 (d,  $J = 8.2$  Hz, 1H), 8.20 (d,  $J = 8.5$  Hz, 1H), 8.44 (s, 1H), 9.06 (s, 1H);  $^{13}\text{C}$  NMR (75 MHz,  $\text{CDCl}_3$ )  $\delta$  113.3 (tq,  $J_{\text{CF}} = 253.2, 38.8$  Hz,  $\text{CF}_2$ ), 119.0 (qt,  $J_{\text{CF}} = 284.2, 38.6$  Hz,  $\text{CF}_3$ ), 121.8 (t,  $J_{\text{CF}} = 24.0$  Hz), 126.3, 128.0, 128.6, 129.6, 131.9, 135.6 (t,  $J_{\text{CF}} = 6.8$  Hz), 146.5 (t,  $J_{\text{CF}} = 5.3$  Hz), 149.4;  $^{19}\text{F}$  NMR (282 MHz,  $\text{CDCl}_3$ )  $\delta$  -84.7 (s, 3F), -114.7 (s, 2F); HRMS (ESI-TOF) calcd for  $\text{C}_{11}\text{H}_7\text{F}_5\text{N}$   $[\text{M}+\text{H}]^+$ : 248.0499, found: 248.0506; FT-IR (neat,  $\text{cm}^{-1}$ ) 1092, 1207, 1498, 1574, 1607, 1626, 3063.

### 1,2-Dimethyl-3-(pentafluoroethyl)benzene (6g)

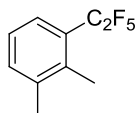

The title compound was obtained from 2,3-dimethylphenylboronic acid **5g** following the procedure above. The yield (87% yield) was determined by  $^{19}\text{F}$  NMR analysis using benzotrifluoride as an internal standard. Purification by silica-gel column chromatography (pentane only) gave the compound (20.3 mg, 83% yield) as a colorless liquid.

$^1\text{H}$  NMR (300 MHz,  $\text{CDCl}_3$ )  $\delta$  2.35 (s, 3H), 2.38 (s, 3H), 7.21 (dd,  $J = 7.9, 7.7$  Hz, 1H), 7.35 (d,  $J = 7.4$  Hz, 1H), 7.43 (d,  $J = 8.0$  Hz, 1H);  $^{13}\text{C}$  NMR (75 MHz,  $\text{CDCl}_3$ )  $\delta$  16.0-16.1 (m, 1C), 20.8, 115.0 (tq,  $J_{\text{CF}} = 252.8, 38.3$  Hz,  $\text{CF}_2$ ), 119.6 (qt,  $J_{\text{CF}} = 284.7, 39.2$  Hz,  $\text{CF}_3$ ), 125.5, 125.8 (t,  $J_{\text{CF}} = 9.0$  Hz), 126.9 (t,  $J_{\text{CF}} = 21.1$  Hz), 133.4, 136.5 (t,  $J_{\text{CF}} = 2.0$  Hz), 138.9;  $^{19}\text{F}$  NMR (282 MHz,  $\text{CDCl}_3$ )  $\delta$  -83.8 (s, 3F), -108.2 (s, 2F); HRMS (ESI-TOF) calcd for  $\text{C}_{10}\text{H}_9\text{F}_5\text{Na}$   $[\text{M}+\text{Na}]^+$ : 247.0522, found: 247.0533; FT-IR (neat,  $\text{cm}^{-1}$ ) 1126, 1210, 1463, 2927, 3069.

### 4-(Pentafluoroethyl)benzaldehyde (6h)

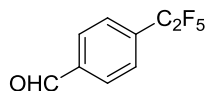

The title compound was obtained from 4-formylphenylboronic acid **5h** following the procedure above. The yield (91% yield) was determined by  $^{19}\text{F}$  NMR analysis using benzotrifluoride as an internal standard. Purification by silica-gel column chromatography (pentane/ $\text{Et}_2\text{O} = 9/1$ ) gave the compound (20.0 mg, 89% yield) as a colorless liquid.

$^1\text{H}$  NMR (300 MHz,  $\text{CDCl}_3$ )  $\delta$  7.78 (d,  $J = 8.1$  Hz, 2H), 8.02 (d,  $J = 8.1$  Hz, 2H), 10.1 (s, 1H);  $^{13}\text{C}$  NMR (282 MHz,  $\text{CDCl}_3$ )  $\delta$  112.9 (tq,  $J_{\text{CF}} = 253.1, 38.3$  Hz,  $\text{CF}_2$ ), 118.8 (qt,  $J_{\text{CF}} = 284.5, 38.3$  Hz,  $\text{CF}_3$ ), 127.3 (t,  $J_{\text{CF}} = 6.3$  Hz), 129.7, 134.0 (t,  $J_{\text{CF}} = 23.8$  Hz), 138.7, 191.1;  $^{19}\text{F}$  NMR (282 MHz,  $\text{CDCl}_3$ )  $\delta$  -84.6 (s, 3F), -115.5 (s, 2F); HRMS (APCI-TOF) calcd for  $\text{C}_9\text{H}_6\text{F}_5\text{O}$   $[\text{M}+\text{H}]^+$ : 225.0339, found: 225.0339; FT-IR (neat,  $\text{cm}^{-1}$ ) 1097, 1265, 1653, 1705, 2987, 3055.

### 1-Bromo-4-(pentafluoroethyl)benzene (6i)

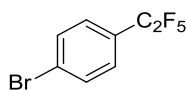

The title compound was obtained from 4-bromophenylboronic acid **5i** following the procedure above. The yield (98% yield) was determined by  $^{19}\text{F}$  NMR analysis using benzotrifluoride as an internal standard. Purification by silica-gel column chromatography (pentane only) gave the compound (25.1 mg, 91% yield) as a pale yellow liquid.

$^1\text{H}$  NMR (300 MHz,  $\text{CDCl}_3$ )  $\delta$  7.47 (d,  $J = 8.4$  Hz, 2H), 7.66 (d,  $J = 8.3$  Hz, 2H);  $^{13}\text{C}$  NMR (282 MHz,  $\text{CDCl}_3$ )  $\delta$  113.2 (tq,  $J_{\text{CF}} = 252.5, 38.3$  Hz,  $\text{CF}_2$ ), 118.9 (qt,  $J_{\text{CF}} = 284.1, 39.2$  Hz,  $\text{CF}_3$ ), 126.8 (t,  $J_{\text{CF}} = 2.0$  Hz), 127.7, 128.1 (t,  $J_{\text{CF}} = 6.2$  Hz), 132.1;  $^{19}\text{F}$  NMR (282 MHz,  $\text{CDCl}_3$ )  $\delta$  -84.9 (s, 3F), -115.2 (s, 2F); HRMS (ESI-TOF) calcd for  $\text{C}_8\text{H}_3\text{BrF}_5$   $[\text{M}-\text{H}]^-$ : 272.9338, found: 272.9335; FT-IR (neat,  $\text{cm}^{-1}$ ) 1073, 1098, 1208, 1599, 3048.

**(*E*)-4-(3,3,4,4,4-Pentafluorobut-1-en-1-yl)-1,1'-biphenyl (6j)**

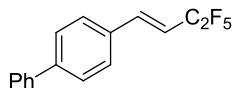

The title compound was obtained from (*E*)-2-[1,1'-biphenyl]-4-ylvinylboronic acid **5j** following the procedure above. The yield (67% yield) was determined by  $^{19}\text{F}$  NMR analysis using benzotrifluoride as an internal standard. Purification by silica-gel column chromatography (hexane only) gave the compound (21.1 mg, 71% yield) as a white solid.

$^1\text{H}$  NMR (300 MHz,  $\text{CDCl}_3$ )  $\delta$  6.25 (dt,  $J = 16.2$ ,  $J_{\text{HF}} = 11.9$  Hz, 1H), 7.26 (dt,  $J = 16.2$ ,  $J_{\text{HF}} = 2.2$  Hz, 1H), 7.38-7.68 (m, 9H);  $^{13}\text{C}$  NMR (282 MHz,  $\text{CDCl}_3$ )  $\delta$  112.8 (tq,  $J_{\text{CF}} = 248.9$ , 38.3 Hz,  $\text{CF}_2$ ), 113.8 (t,  $J_{\text{CF}} = 23.0$  Hz), 119.1 (qt,  $J_{\text{CF}} = 283.8$ , 38.3 Hz,  $\text{CF}_3$ ), 127.0, 127.6, 127.9, 128.1, 128.9, 132.4, 139.2 (t,  $J_{\text{CF}} = 9.8$  Hz), 140.0, 142.9;  $^{19}\text{F}$  NMR (282 MHz,  $\text{CDCl}_3$ )  $\delta$  -85.0 (s, 3F), -114.7 (d,  $J_{\text{FH}} = 10.4$  Hz, 2F); HRMS (ESI-TOF) calcd for  $\text{C}_{16}\text{H}_{10}\text{F}_5$  [ $\text{M}-\text{H}$ ] $^-$ : 297.0703, found: 297.0699; FT-IR (neat,  $\text{cm}^{-1}$ ) 1200, 1488, 1658, 3034.

**(*S*)-2,2'-Dimethoxy-3,3'-bis(pentafluoroethyl)-1,1'-binaphthalene (6k)**

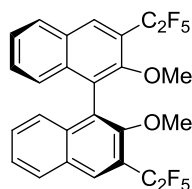

The title compound was obtained from (*S*)-(2,2'-dimethoxy-[1,1'-binaphthalene]-3,3'-diyl)diboronic acid **5k** with  $\text{CuC}_2\text{F}_5$  reagent (4 eq.) following the procedure above. The yield (90% yield) was determined by  $^{19}\text{F}$  NMR analysis using benzotrifluoride as an internal standard. Purification by silica-gel column chromatography (hexane/AcOEt = 20/1) gave the compound (50.7 mg, 92% yield) as a white solid.

$^1\text{H}$  NMR (300 MHz,  $\text{CDCl}_3$ )  $\delta$  3.32 (s, 6H), 7.17 (d,  $J = 8.4$  Hz, 2H), 7.39-7.44 (m, 2H), 7.50-7.55 (m, 2H), 8.01 (d,  $J = 8.2$  Hz, 2H), 8.33 (s, 2H);  $^{13}\text{C}$  NMR (75 MHz,  $\text{CDCl}_3$ )  $\delta$  61.9, 113.9 (tq,  $J_{\text{CF}} = 254.0$ , 39.2 Hz,  $\text{CF}_2$ ), 119.4 (qt,  $J_{\text{CF}} = 285.1$ , 38.5 Hz,  $\text{CF}_3$ ), 122.1 (t,  $J_{\text{CF}} = 22.1$  Hz), 125.4, 125.8, 126.1, 129.0, 129.2, 129.4, 131.1 (t,  $J_{\text{CF}} = 8.9$  Hz), 135.8, 154.1;  $^{19}\text{F}$  NMR (282 MHz,  $\text{CDCl}_3$ )  $\delta$  -83.1 (s, 3F), -110.2 (d,  $J_{\text{FF}} = 268.8$  Hz, 1F), -111.21 (d,  $J_{\text{FF}} = 268.8$  Hz, 1F); HRMS (ESI-TOF) calcd for  $\text{C}_{26}\text{H}_{16}\text{F}_{10}\text{NaO}_2$  [ $\text{M}+\text{Na}$ ] $^+$ : 573.0888, found: 573.0896; FT-IR (neat,  $\text{cm}^{-1}$ ) 1154, 1200, 1625, 2853, 3065;  $[\alpha]_{\text{D}}^{25} +68.5$  ( $c$  0.88,  $\text{CHCl}_3$ ).

**Pentafluoroethylation of Aryl Bromides**

Aryl bromide substrates: **7b**, **7f-g**, **7i-j**, and **7l** were purchased from Aldrich. **7a**, **7c-e**, **7h**, and **7k** were purchased from TCI.

**Typical Procedure for Pentafluoroethylation of Aryl Bromides with  $\text{CuC}_2\text{F}_5$  Reagent (Scheme 3)**

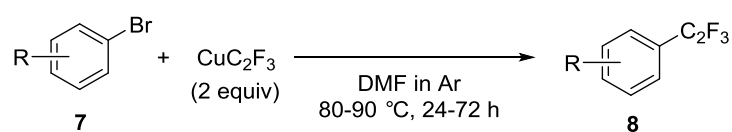

A mixture of aryl bromide **7** (0.2 mmol) and  $\text{CuC}_2\text{F}_5$  reagent (DMF solution 0.9-1.0 M, 400-444



$\mu\text{L}$ , 0.4 mmol, prepared by  $\text{CuCl}$ ,  $\text{NaO}^t\text{Bu}$ , and ethyl pentafluoropropionate in DMF) neutralized by  $\text{Et}_3\text{N}\cdot 3\text{HF}$  (26  $\mu\text{L}$ , 0.16 mmol) was stirred for 24-72 hours at 80-90  $^\circ\text{C}$  under argon atmosphere. The reaction mixture was quenched by 1M  $\text{HCl}$  aq. (5 mL). The organic layer was separated, and the aqueous layer was extracted with  $\text{Et}_2\text{O}$  (5 mL  $\times$  3). The combined organic layer was washed with brine (10 mL), dried over  $\text{Na}_2\text{SO}_4$ , and evaporated. The resulting crude product was purified by silica-gel column chromatography to give the trifluoromethylated products **8**.

### Effect of Triethylamine in Pentafluoroethylation of Aryl Bromides

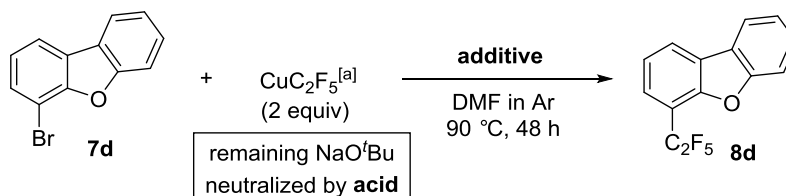

| entry | acid                                              | additive                        | yield (%) <sup>[b]</sup> |
|-------|---------------------------------------------------|---------------------------------|--------------------------|
| 1     | $\text{Et}_3\text{N}\cdot 3\text{HF}$ (0.8 equiv) | $\text{Et}_3\text{N}$ (5 equiv) | 62                       |
| 2     | $\text{Et}_3\text{N}\cdot 3\text{HF}$ (0.8 equiv) | $\text{Et}_3\text{N}$ (2 equiv) | 70                       |
| 3     | $\text{Et}_3\text{N}\cdot 3\text{HF}$ (0.8 equiv) | -                               | 95                       |

[a]  $\text{CuC}_2\text{F}_5$  reagent neutralized by acid before being used in the reaction.

[b] Determined by  $^{19}\text{F}$  NMR analysis using BTf as an internal standard.

### 1-Nitro-4-(pentafluoroethyl)benzene (**8a**) = (**6a**)

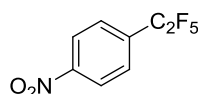

The title compound was obtained from 1-bromo-4-nitrobenzene **7a** at 80  $^\circ\text{C}$  for 24 hours following the procedure above. The yield (92% yield) was determined by  $^{19}\text{F}$  NMR analysis using benzotrifluoride as an internal standard.

### 1-(Pentafluoroethyl)-4-(trifluoromethyl)benzene (**8b**) = (**6b**)

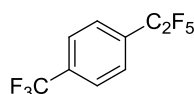

The title compound was obtained from 1-bromo-4-(trifluoromethyl)benzene **7b** at 80  $^\circ\text{C}$  for 48 hours following the procedure above. The yield (85% yield) was determined by  $^{19}\text{F}$  NMR analysis using (trifluoromethoxy)benzene as an internal standard.

### 1-Methoxy-4-(pentafluoroethyl)benzene (**8c**) = (**6c**)

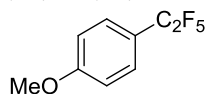

The title compound was obtained from 1-bromo-4-methoxybenzene **7c** at 90  $^\circ\text{C}$  for 72 hours following the procedure above. The yield (77% yield) was determined by  $^{19}\text{F}$  NMR analysis using benzotrifluoride as an internal standard.

**4-(Pentafluoroethyl)dibenzo[*b,d*]furan (8d) = (6d)**

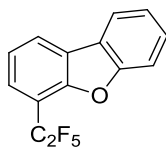

The title compound was obtained from 4-bromodibenzo[*b,d*]furan **7d** at 80 °C for 48 hours following the procedure above. The yield (98% yield) was determined by <sup>19</sup>F NMR analysis using benzotrifluoride as an internal standard.

**1-(*tert*-Butyl)-4-(pentafluoroethyl)benzene (8e) = (6e)**

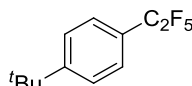

The title compound was obtained from 1-bromo-4-(*tert*-butyl)benzene **7e** at 90 °C for 72 hours following the procedure above. The yield (81% yield) was determined by <sup>19</sup>F NMR analysis using benzotrifluoride as an internal standard.

**3-(Pentafluoroethyl)quinoline (8f) = (6f)**

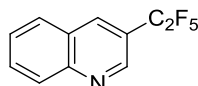

The title compound was obtained from 3-bromoquinoline **7f** at 90 °C for 48 hours following the procedure above. The yield (86% yield) was determined by <sup>19</sup>F NMR analysis using benzotrifluoride as an internal standard.

**1,2-Dimethyl-3-(pentafluoroethyl)benzene (8g) = (6g)**

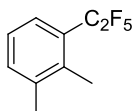

The title compound was obtained from 1-bromo-2,3-dimethylbenzene **7g** at 90 °C for 72 hours following the procedure above. The yield (60% yield) was determined by <sup>19</sup>F NMR analysis using benzotrifluoride as an internal standard.

**4-(Pentafluoroethyl)benzaldehyde (8h) = (6h)**

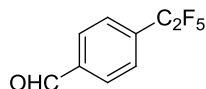

The title compound was obtained from 4-bromobenzaldehyde **7h** at 80 °C for 48 hours following the procedure above. The yield (92% yield) was determined by <sup>19</sup>F NMR analysis using benzotrifluoride as an internal standard.

**Ethyl 2-(pentafluoroethyl)benzoate (8i)**

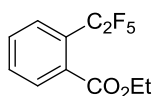

The title compound was obtained from ethyl 2-bromobenzoate **7i** at 80 °C for 24 hours following the procedure above. The yield (99% yield) was determined by  $^{19}\text{F}$  NMR analysis using benzotrifluoride as an internal standard. Purification by silica-gel column chromatography (pentane/Et<sub>2</sub>O = 10/1) gave the compound (53.0 mg, 99% yield) as a pale yellow liquid. The compound **8i** is known compound, the following data is identical to those given in corresponding literature.<sup>[7]</sup>

$^1\text{H}$  NMR (300 MHz, CDCl<sub>3</sub>)  $\delta$  1.35 (t,  $J$  = 7.1 Hz, 3H), 4.37 (q,  $J$  = 7.1 Hz, 2H), 7.53-7.64 (m, 4H);  $^{13}\text{C}$  NMR (75 MHz, CDCl<sub>3</sub>)  $\delta$  13.8, 62.1, 113.6 (tq,  $J_{\text{CF}}$  = 254.0, 38.9 Hz, CF<sub>2</sub>), 119.0 (qt,  $J_{\text{CF}}$  = 285.2, 38.5 Hz, CF<sub>3</sub>), 125.9 (t,  $J_{\text{CF}}$  = 23.4 Hz), 128.1 (t,  $J_{\text{CF}}$  = 7.1 Hz), 129.0, 130.1, 131.8, 133.6 (t,  $J_{\text{CF}}$  = 3.2 Hz), 167.8;  $^{19}\text{F}$  NMR (282 MHz, CDCl<sub>3</sub>)  $\delta$  -83.2 (s, 3F), -108.5 (s, 2F).

### 1,3-Dimethyl-5-(pentafluoroethyl)pyrimidine-2,4(1H,3H)-dione (**8j**)

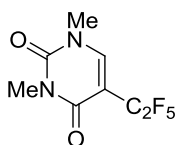

The title compound was obtained from 5-bromo-1,3-dimethylpyrimidine-2,4(1H,3H)-dione **7j** at 90 °C for 72 hours following the procedure above. The yield (90% yield) was determined by  $^{19}\text{F}$  NMR analysis using benzotrifluoride as an internal standard. Purification by silica-gel column chromatography (hexane/AcOEt = 1/1) gave the compound (44.1 mg, 85% yield) as a yellow solid.

$^1\text{H}$  NMR (300 MHz, CDCl<sub>3</sub>)  $\delta$  3.33 (s, 3H), 3.49 (s, 3H), 7.64 (s, 1H);  $^{13}\text{C}$  NMR (75 MHz, CDCl<sub>3</sub>)  $\delta$  28.0, 37.8, 101.8 (t,  $J_{\text{CF}}$  = 23.9 Hz), 111.9 (tq,  $J_{\text{CF}}$  = 254.2, 40.5 Hz, CF<sub>2</sub>), 118.8 (qt,  $J_{\text{CF}}$  = 284.9, 39.1 Hz, CF<sub>3</sub>), 145.4 (t,  $J_{\text{CF}}$  = 10.1 Hz), 150.8, 158.4 (t,  $J_{\text{CF}}$  = 1.9 Hz);  $^{19}\text{F}$  NMR (282 MHz, CDCl<sub>3</sub>)  $\delta$  -83.8 (s, 3F), -113.9 (s, 2F); HRMS (ESI-TOF) calcd for C<sub>8</sub>H<sub>6</sub>F<sub>5</sub>N<sub>2</sub>O<sub>2</sub> [M-H]<sup>-</sup>: 257.0349, found: 257.03418; FT-IR (neat, cm<sup>-1</sup>) 1120, 1195, 1462, 1680, 1715, 2963, 3069.

### (3,3,4,4,4-pentafluorobut-1-en-1-yl)benzene (**8k**)

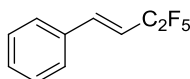

The title compound was obtained from (2-bromovinyl)benzene **7k** ( $E:Z$  = 12:1) at 90 °C for 60 hours following the procedure above. The yield (79% yield) was determined by  $^{19}\text{F}$  NMR analysis using benzotrifluoride as an internal standard. Purification by silica-gel column chromatography (pentane only) gave the compound (33.1 mg, 74% yield,  $E:Z$  = 12:1) as a colorless liquid.

$^1\text{H}$  NMR (300 MHz, CDCl<sub>3</sub>)  $\delta$  6.20 (dt,  $J$  = 16.2, 11.9 Hz, 1H), 7.20 (d,  $J$  = 16.2, 2.3 Hz, 1H), 7.38-7.50 (m, 5H);  $^{13}\text{C}$  NMR (75 MHz, CDCl<sub>3</sub>)  $\delta$  112.8 (tq,  $J_{\text{CF}}$  = 248.8, 38.3 Hz, CF<sub>2</sub>), 114.1 (t,  $J_{\text{CF}}$  = 23.0 Hz), 119.1 (qt,  $J_{\text{CF}}$  = 283.7, 38.3 Hz, CF<sub>3</sub>), 127.6, 129.0, 130.2, 133.5, 139.7 (t,  $J_{\text{CF}}$  = 4.5 Hz);  $^{19}\text{F}$  NMR (282 MHz, CDCl<sub>3</sub>)  $\delta$  -85.1 (s, 3F,  $E$  isomer), -85.6 (s, 3F,  $Z$  isomer), -109.3 (d,  $J_{\text{FH}}$  = 15.1 Hz, 2F,  $Z$  isomer), -114.9 (d,  $J_{\text{FH}}$  = 12.0 Hz, 2F,  $E$  isomer); HRMS (APCI-TOF) calcd for C<sub>10</sub>H<sub>7</sub>F<sub>5</sub> [M+H]<sup>+</sup>: 223.0546, found: 223.0543; FT-IR (neat, cm<sup>-1</sup>) 973, 1199, 1496, 1659, 2856, 2928.

### (*R*)-3,3'-Bis(pentafluoroethyl)-[1,1'-binaphthalene]-2,2'-diol (**8l**)

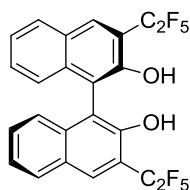

The title compound was obtained from (*R*)-3,3'-dibromo-1,1'-binaphthalene-2,2'-diol **7k** with  $\text{CuC}_2\text{F}_5$  reagent (4 eq.) at 90 °C for 72 hours following the procedure above. The yield (66% yield) was determined by  $^{19}\text{F}$  NMR analysis using benzotrifluoride as an internal standard. Purification by silica-gel column chromatography (hexane/AcOEt = 12/1) gave the compound (63.9 mg, 61% yield) as a white solid.

$^1\text{H}$  NMR (300 MHz,  $\text{CDCl}_3$ )  $\delta$  5.38 (s, 2H), 7.11 (d,  $J$  = 8.2 Hz, 2H), 7.43-7.53 (m, 4H), 8.02 (d,  $J$  = 7.4 Hz, 2H), 8.37 (s, 2H);  $^{13}\text{C}$  NMR (75 MHz,  $\text{CDCl}_3$ )  $\delta$  112.6, 113.6 (tq,  $J_{\text{CF}}$  = 254.3, 39.6 Hz,  $\text{CF}_2$ ), 116.8 (t,  $J_{\text{CF}}$  = 22.9 Hz), 119.3 (qt,  $J_{\text{CF}}$  = 285.2, 38.6 Hz,  $\text{CF}_3$ ), 123.8, 125.5, 128.0, 129.7, 130.2, 132.5 (t,  $J_{\text{CF}}$  = 8.3 Hz), 134.8, 150.0;  $^{19}\text{F}$  NMR (282 MHz,  $\text{CDCl}_3$ )  $\delta$  -83.5 (s, 6F), -111.6 (s, 4F); HRMS (ESI-TOF) calcd for  $\text{C}_{24}\text{H}_{11}\text{F}_{10}\text{O}_2$   $[\text{M}-\text{H}]^-$ : 521.0599, found: 521.0596; FT-IR (neat,  $\text{cm}^{-1}$ ) 1146, 1199, 1626, 3063, 3357, 3531;  $[\alpha]_{\text{D}}^{25}$  +34.3 ( $c$  1.25,  $\text{CHCl}_3$ ).

### Large Scale Operation of Pentafluoroethylation (Scheme 4)

#### Pentafluoroethylation of Arylboronic Acid **5d**

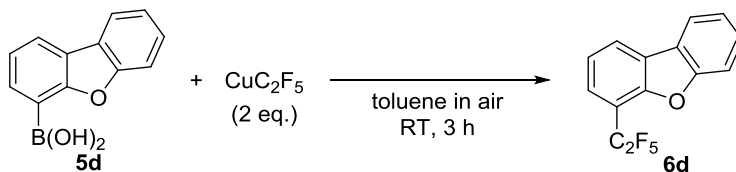

A mixture of  $\text{CuCl}$  (2.1 g, 21 mmol) and  $\text{KO}^t\text{Bu}$  (4.7 g, 42 mmol) in DMF (42 mL) was stirred for 1 hour at room temperature under argon atmosphere. To the mixture was added dropwise ethyl pentafluoropropionate **1b** (3.1 mL, 21 mmol) at 50 °C. After the reaction mixture was stirred for 30 min,  $\text{CuC}_2\text{F}_5$  species was observed by  $^{19}\text{F}$  NMR analysis using benzotrifluoride as an internal standard (>95% yield). To the mixture was added  $\text{Et}_3\text{N}\cdot 3\text{HF}$  (1.4 mL, 8.4 mmol) at 0 °C for the neutralization of  $\text{CuC}_2\text{F}_5$  reagent. A solution of dibenzo[*b,d*]furan-4-ylboronic acid **5d** (2.1 g, 10 mmol) in toluene (100 mL) was added to the mixture at room temperature in the air. After stirring for 3 hours, the reaction mixture was quenched by 1M  $\text{HCl}$  aq. (50 mL). The organic layer was separated, and the aqueous layer was extracted with  $\text{Et}_2\text{O}$  (50 mL  $\times$  3). The combined organic layer was washed with brine (80 mL), dried over  $\text{Na}_2\text{SO}_4$ , and evaporated. The resulting crude product was purified by silica-gel column chromatography (hexane only) to give the pentafluoroethylated product **6d** (2.4 g, 84% yield) as a white solid.

#### Pentafluoroethylation of Aryl Bromide **7i**

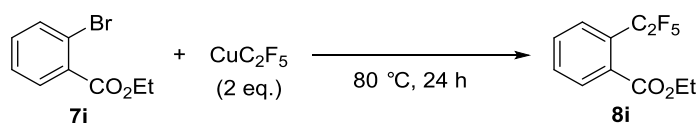

A mixture of  $\text{CuCl}$  (2.1 g, 21 mmol) and  $\text{NaO}^t\text{Bu}$  (4.0 g, 42 mmol) in DMF (10 mL) was stirred

for 1 hour at room temperature under argon atmosphere. To the mixture was added dropwise ethyl pentafluoropropionate **1b** (3.1 mL, 21 mmol) at 50 °C. After the reaction mixture was stirred for 2 h,  $\text{CuC}_2\text{F}_5$  species was observed by  $^{19}\text{F}$  NMR analysis using benzotrifluoride as an internal standard (>95% yield). To the mixture was added  $\text{Et}_3\text{N}\cdot 3\text{HF}$  (1.4 mL, 8.4 mmol) at 0 °C for the neutralization of  $\text{CuC}_2\text{F}_5$  reagent. Ethyl 2-bromobenzoate **7i** (2.2 g, 10 mmol) was added to the mixture at room temperature under argon atmosphere. After stirring at 80 °C for 24 hours, the reaction mixture was quenched by 1M HCl aq. (50 mL). The organic layer was separated, and the aqueous layer was extracted with  $\text{Et}_2\text{O}$  (50 mL  $\times$  3). The combined organic layer was washed with brine (80 mL), dried over  $\text{Na}_2\text{SO}_4$ , and evaporated. The resulting crude product was purified by silica-gel column chromatography (pentane/ $\text{Et}_2\text{O}$  = 10/1) to give the pentafluoroethylated product **8i** (2.6 g, 98% yield) as a pale yellow liquid.

## References

- [1] Ramachandran, P. V.; Teodorovic, A. V.; Brown, H. C. *Tetrahedron* **1993**, *49*, 1725.
- [2] Xue, C.; He, G.; Fu, C.; Xue, L.; Lin, Z.; Ma, S. *Eur. J. Org. Chem.* **2010**, 7012.
- [3] Uno, H.; Shiraishi, Y.; Simokawa, K.; Suzuki, H. *Chem. Lett.* **1987**, 1153.
- [4] Xin, Z.; Gogsig, T. M.; Lindhardt, A. T.; Skrydstrup, T. *Org. Lett.* **2012**, *14*, 284.
- [5] White, E. H.; Field, K. W. *J. Am. Chem. Soc.* **1975**, *97*, 2148.
- [6] Wipf, P.; Jung, J.-K. *J. Org. Chem.* **2000**, *65*, 6319.
- [7] Popov, I.; Lindeman, S.; Daugulis, O. *J. Am. Chem. Soc.* **2011**, *133*, 9286.

$^{13}\text{C}$

$\text{CuC}_2\text{F}_5$

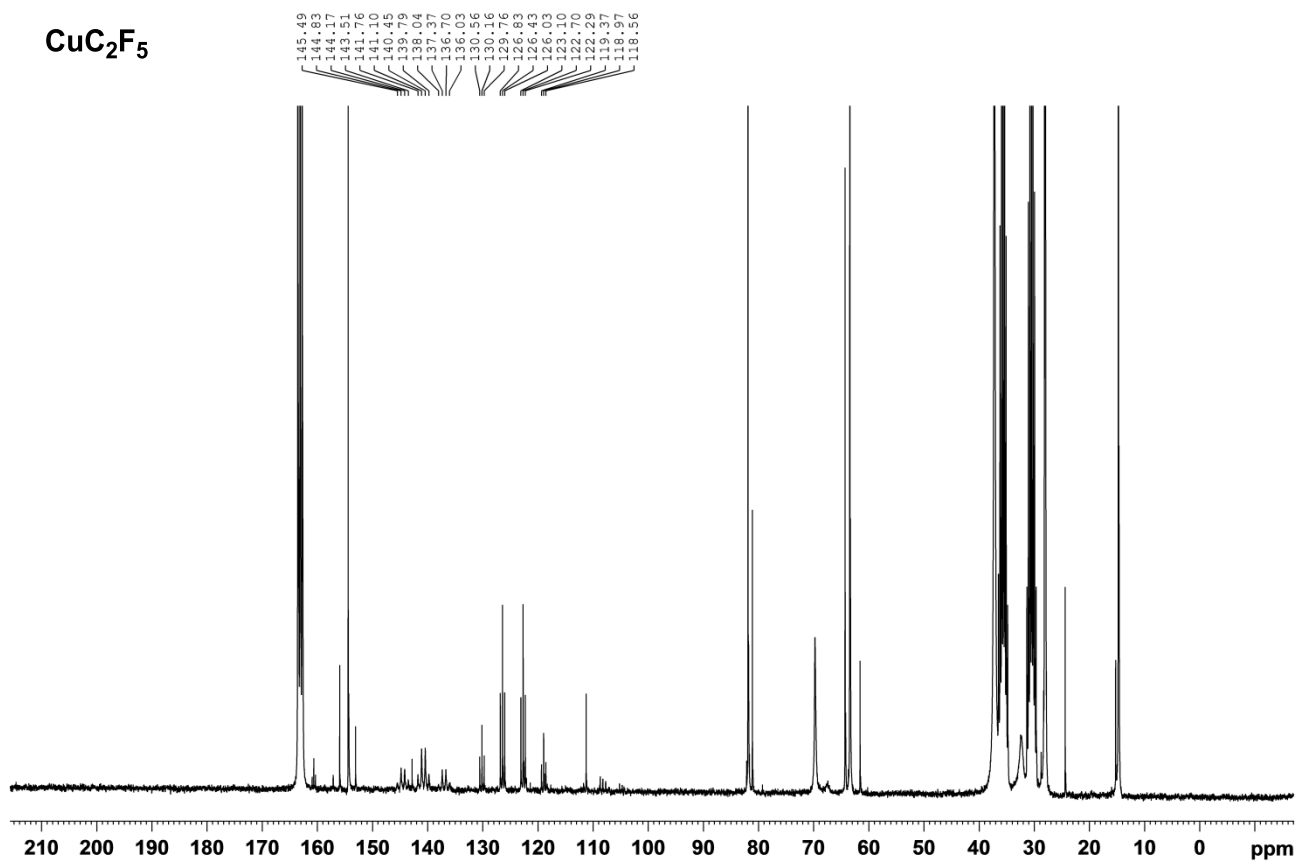

$^{19}\text{F}$

$\text{CuC}_2\text{F}_5$

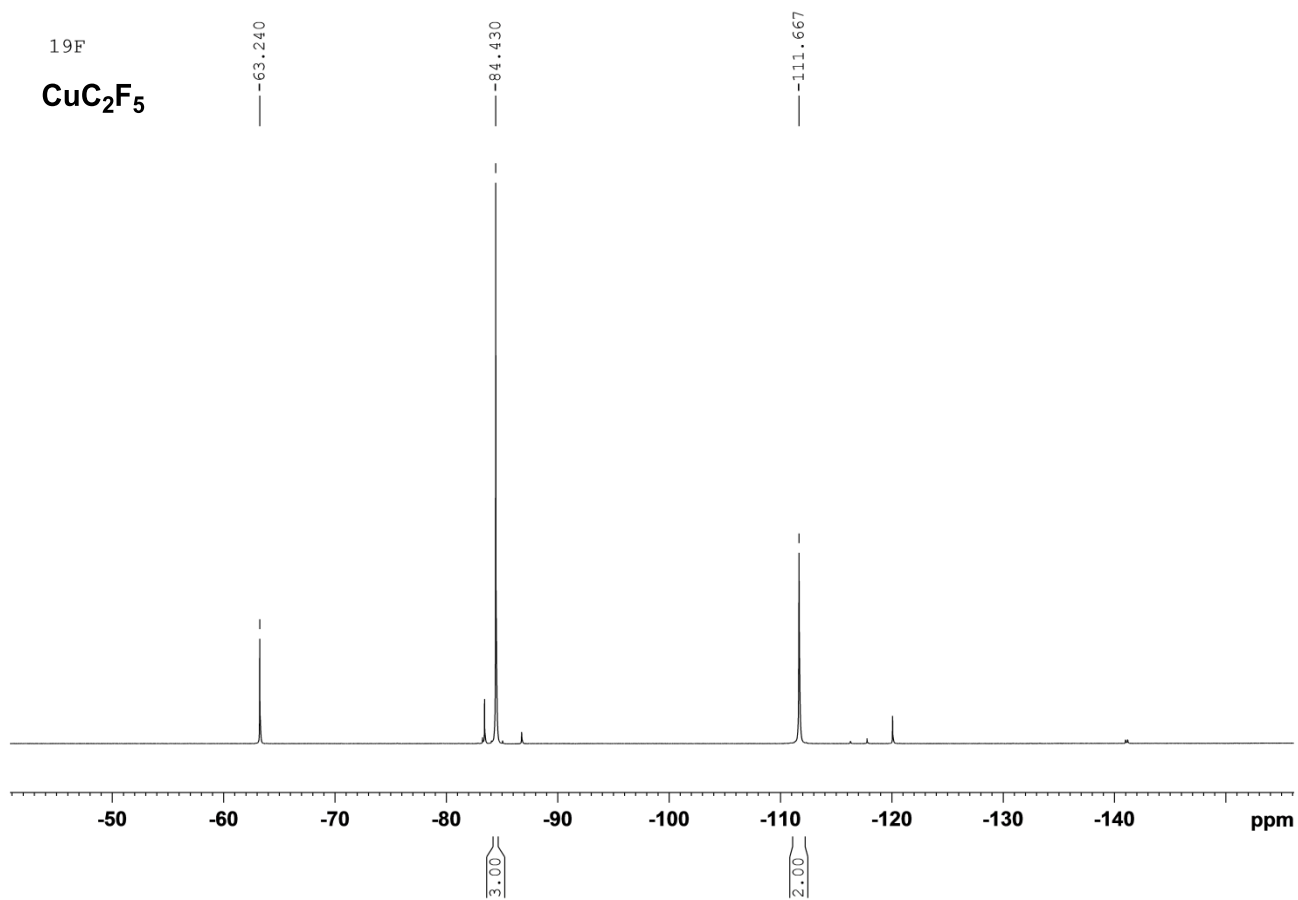

<sup>1</sup>H

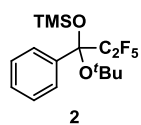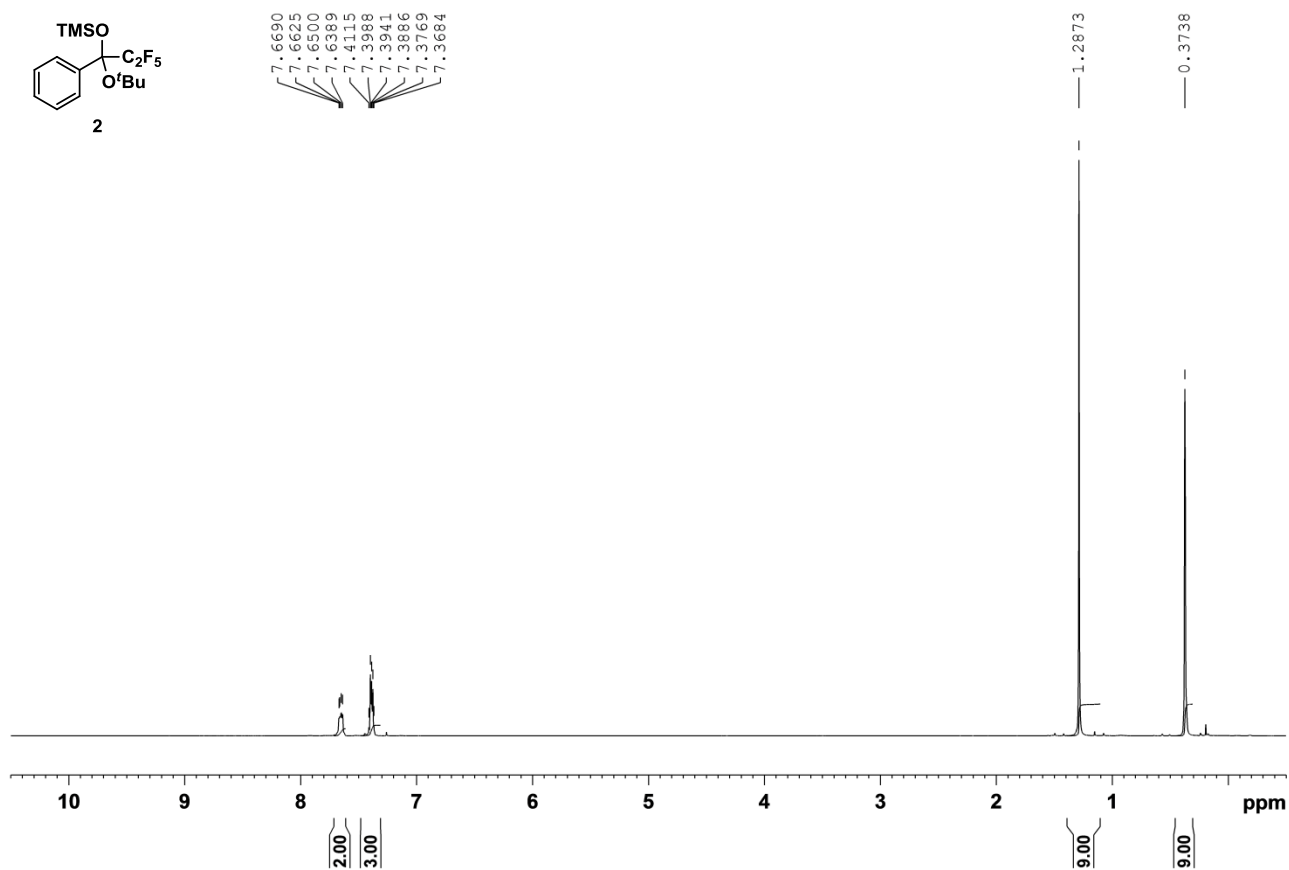

<sup>13</sup>C

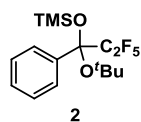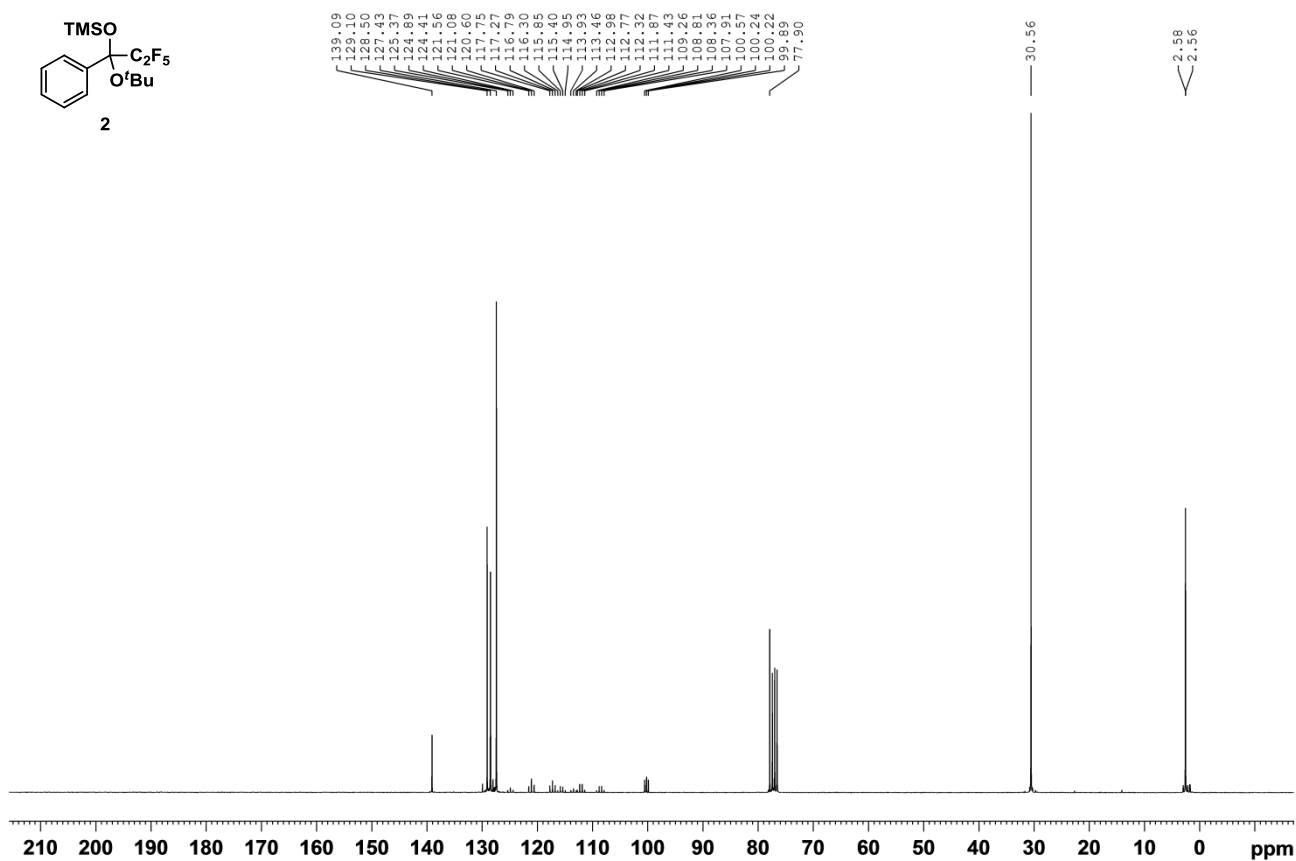

<sup>19</sup>F

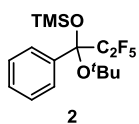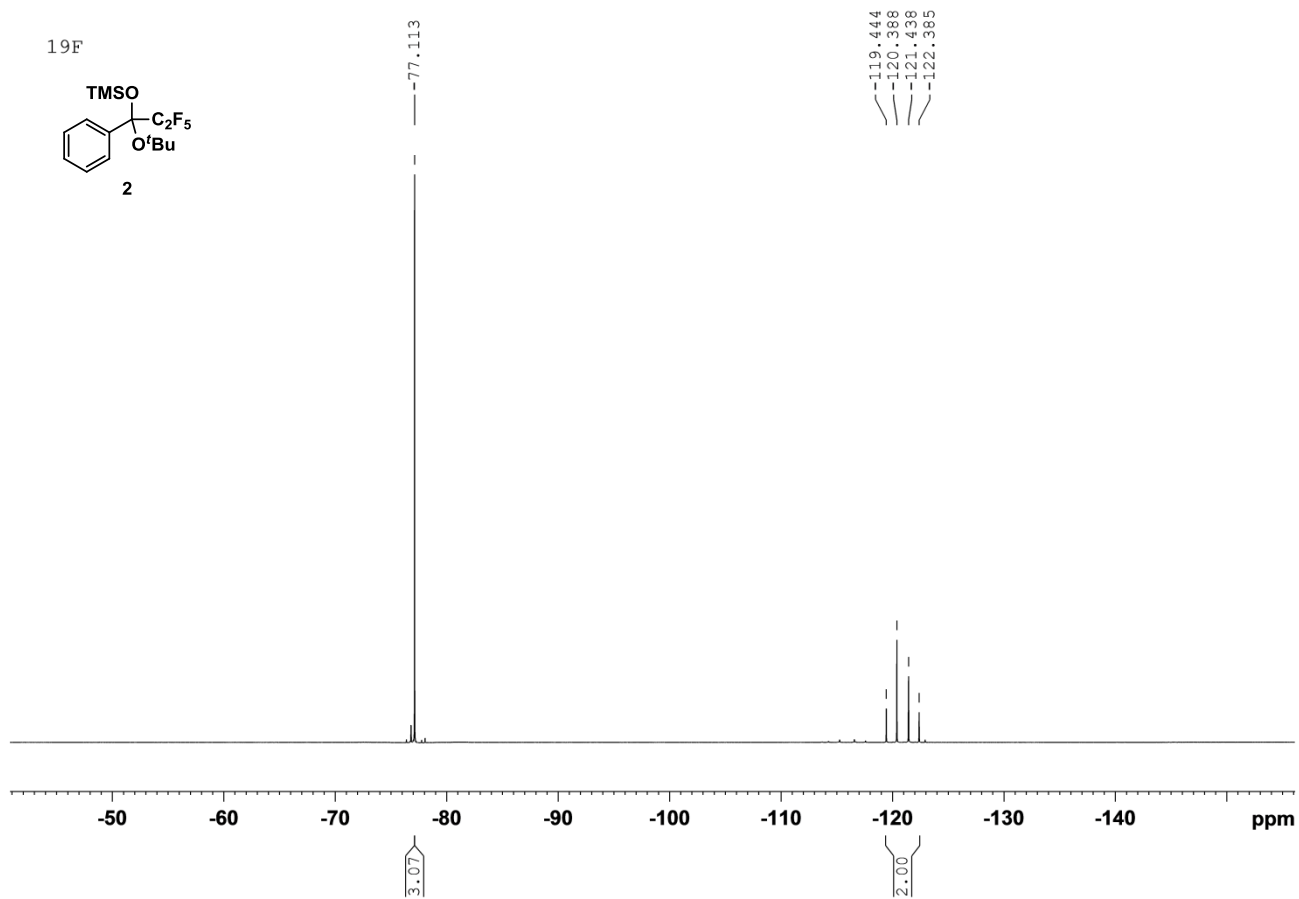

<sup>1</sup>H

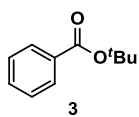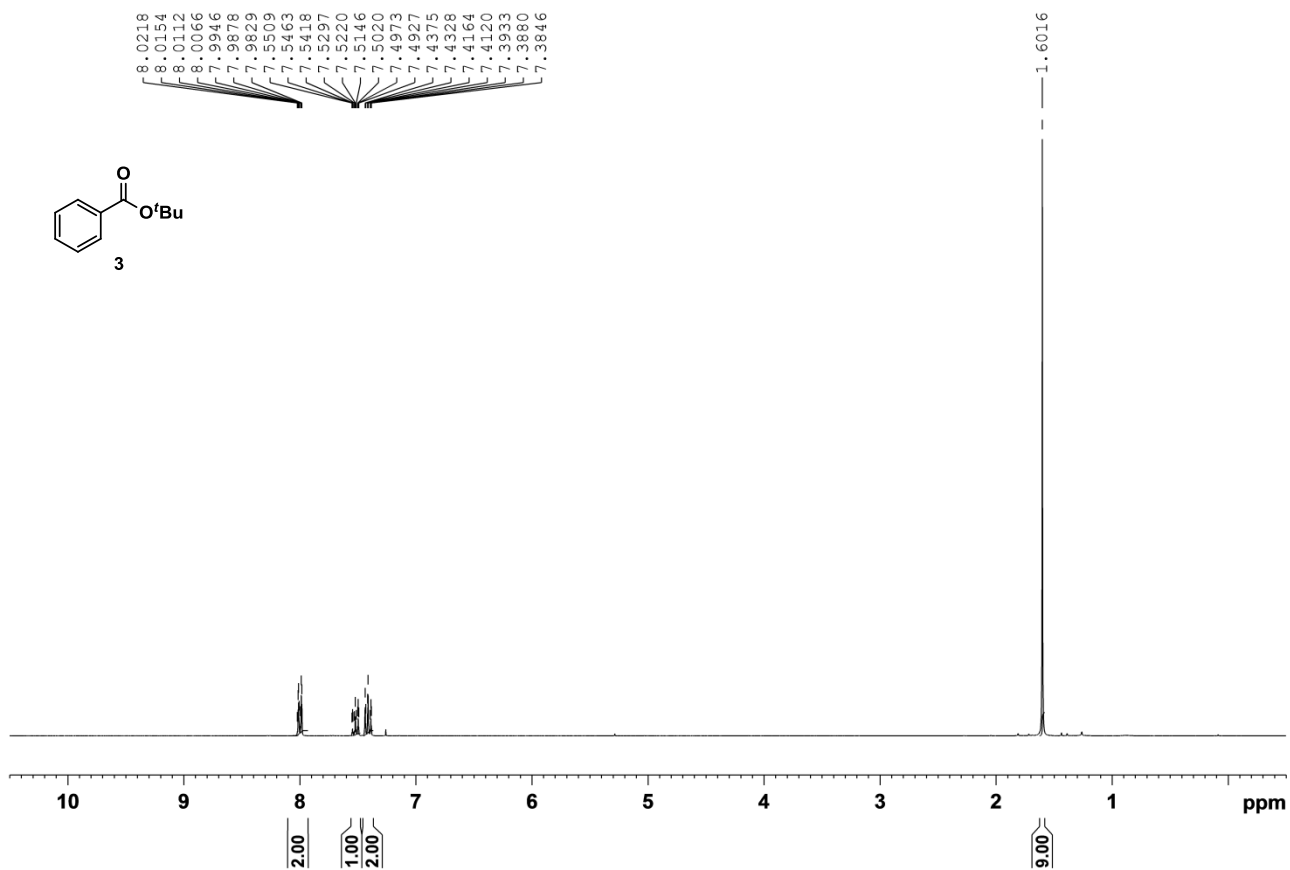



<sup>13</sup>C

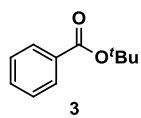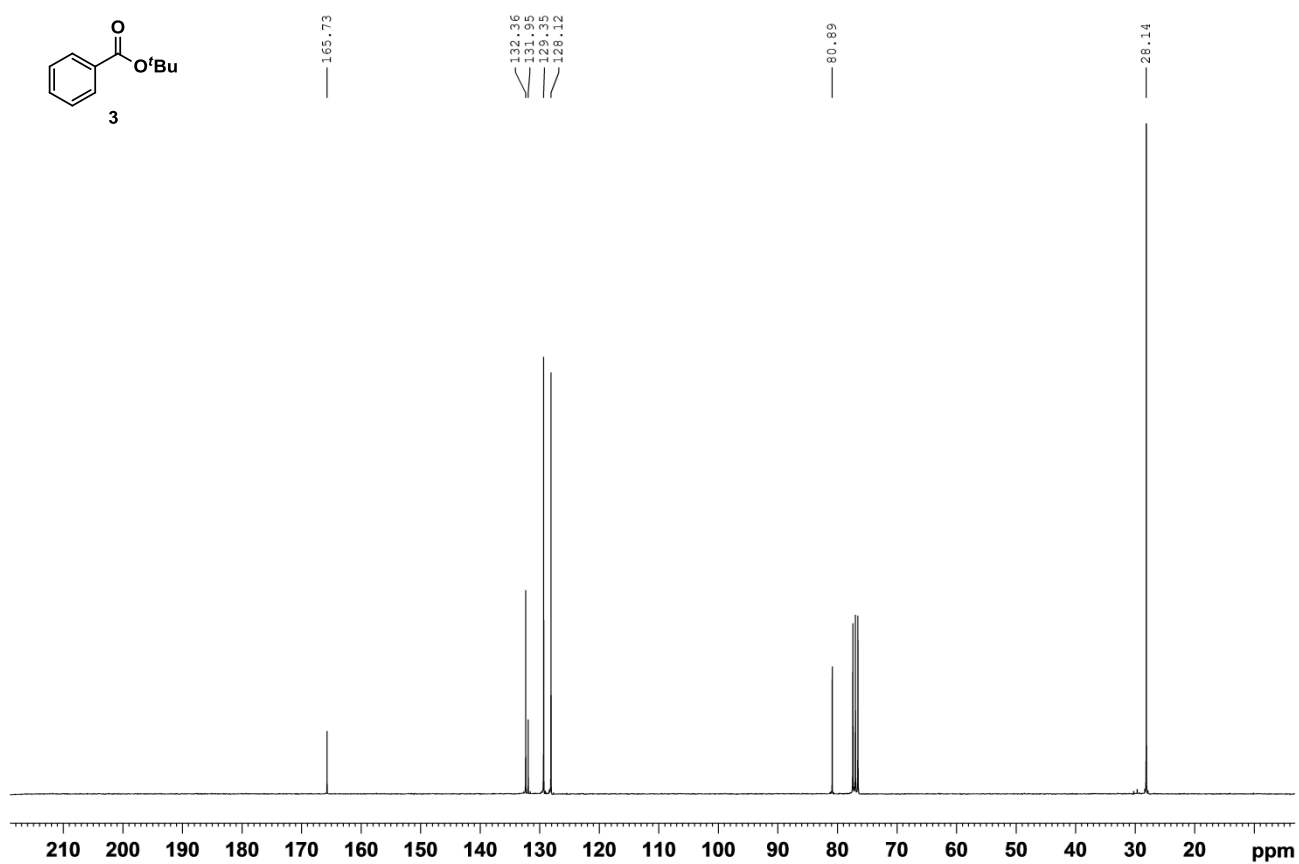

<sup>1</sup>H

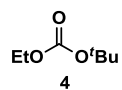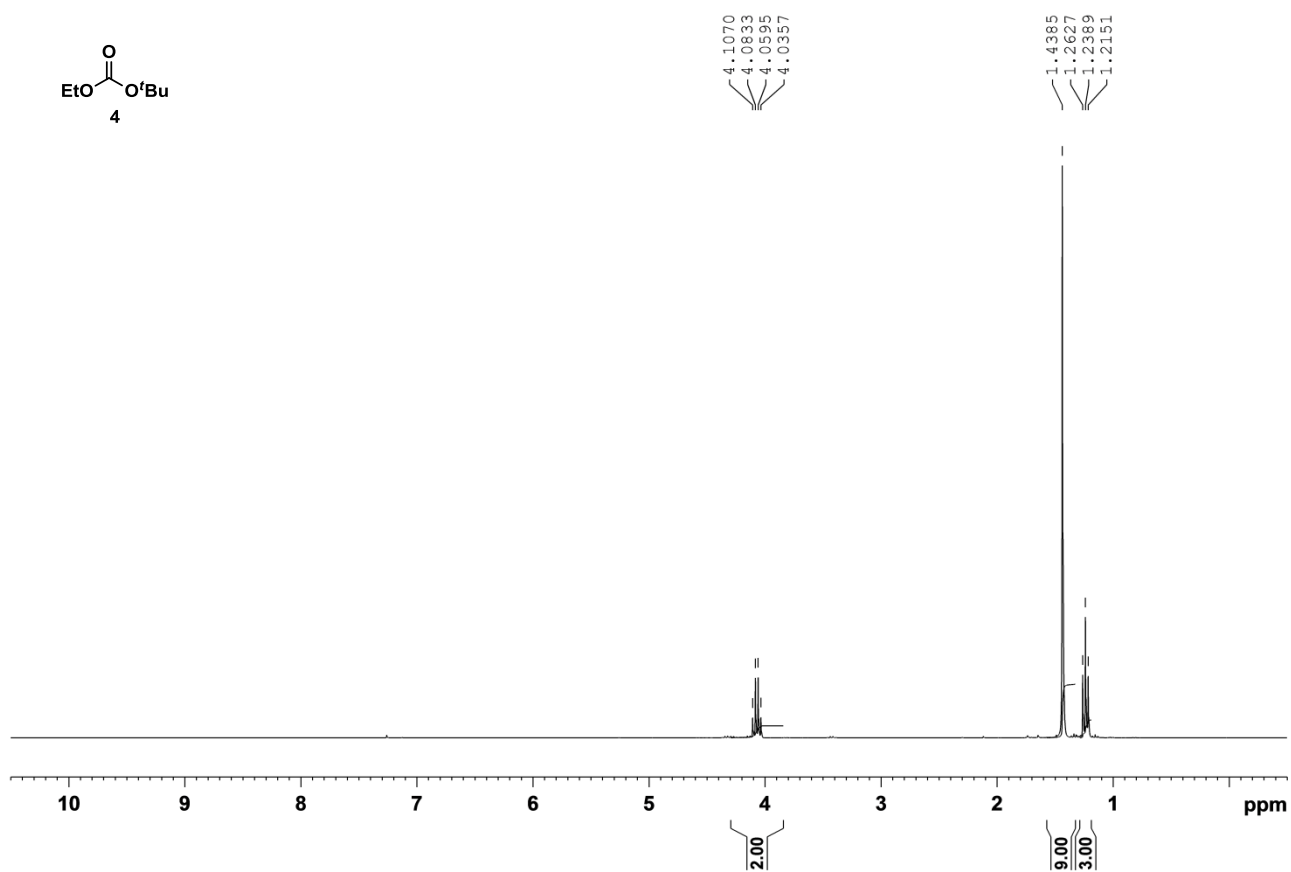

<sup>13</sup>C

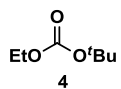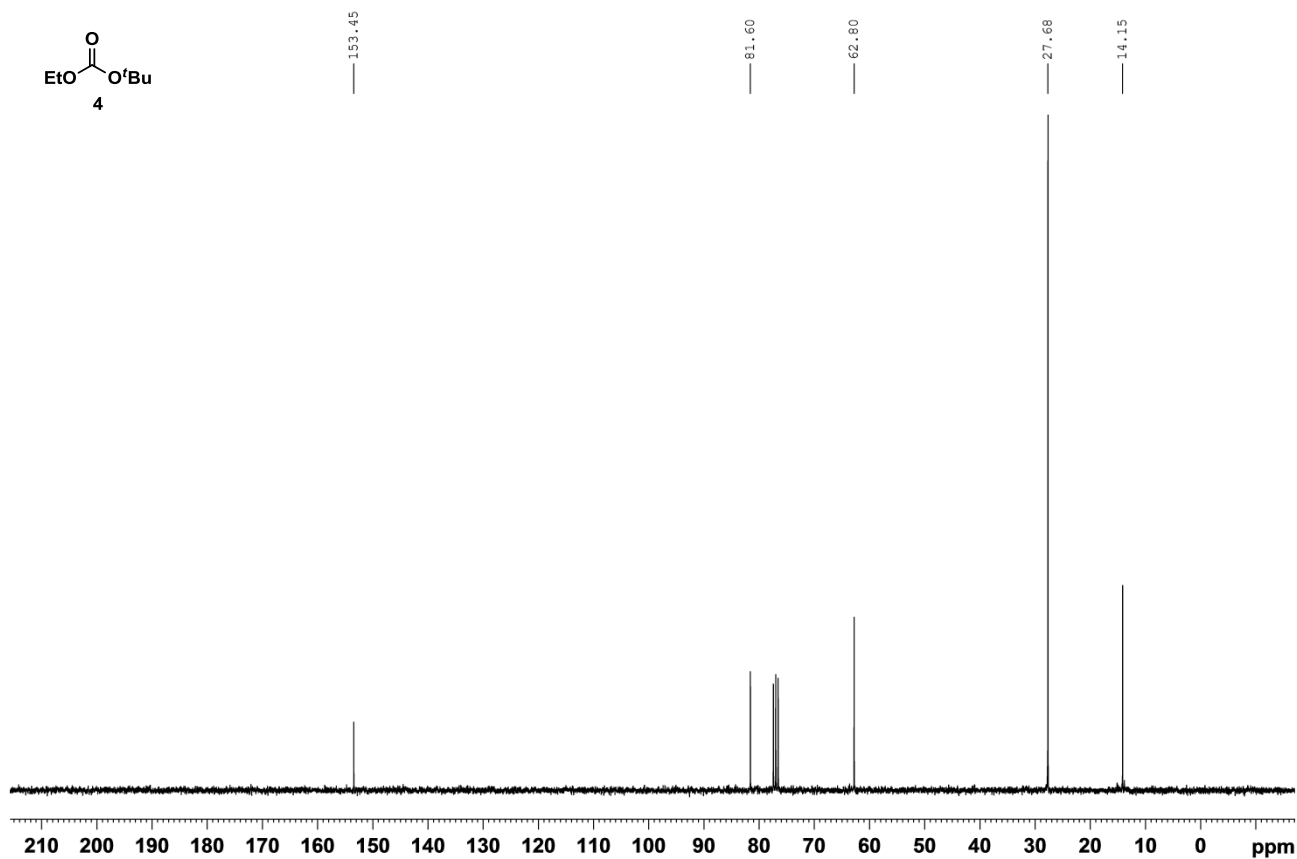

<sup>1</sup>H

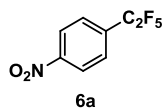

8.3931  
8.3631  
7.8422  
7.8130

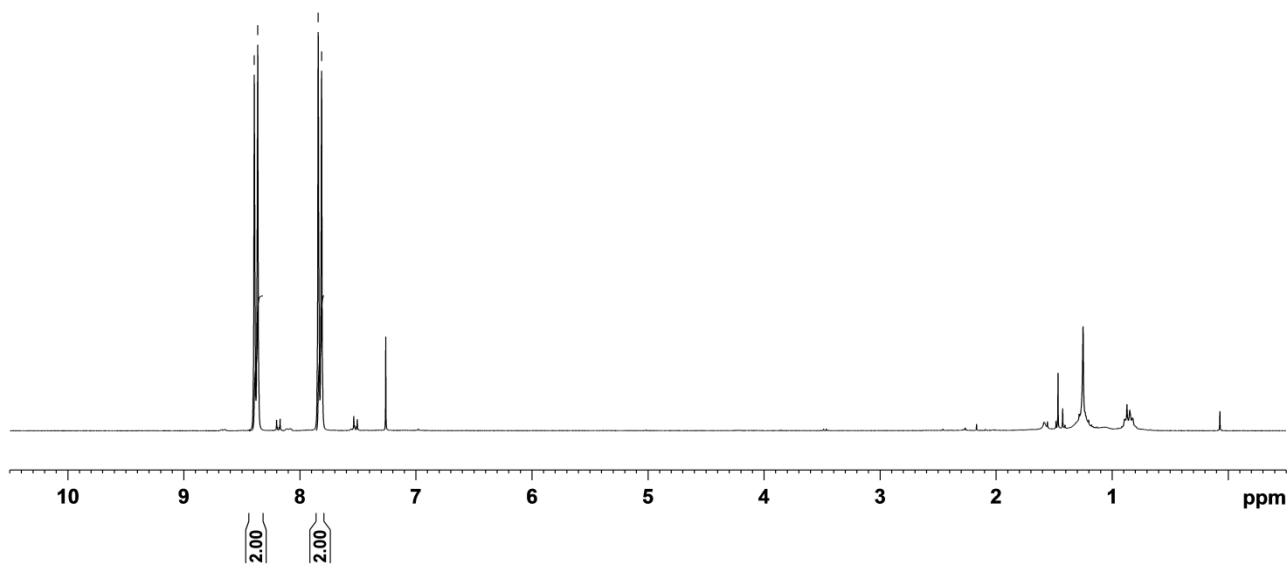

<sup>13</sup>C

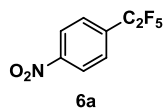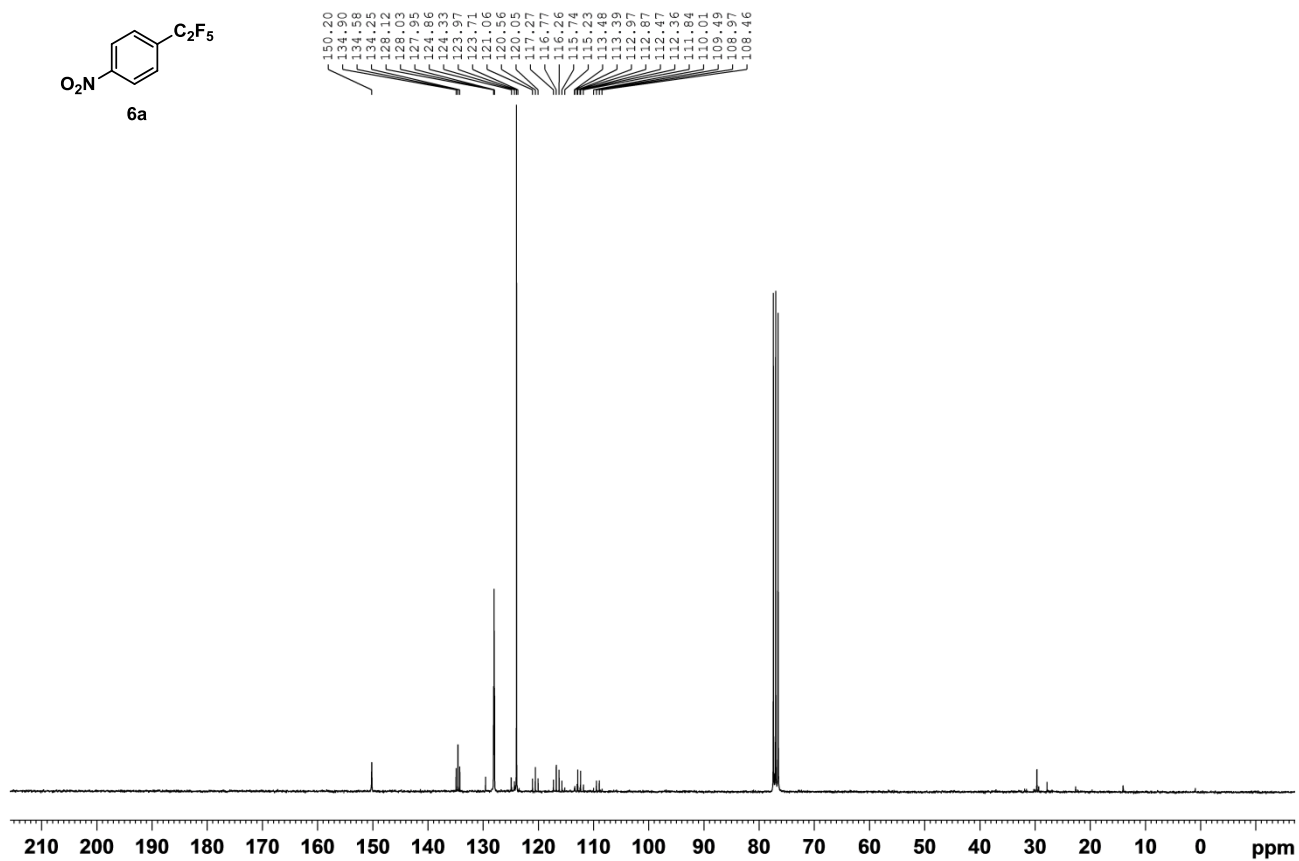

<sup>19</sup>F

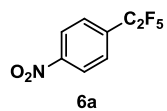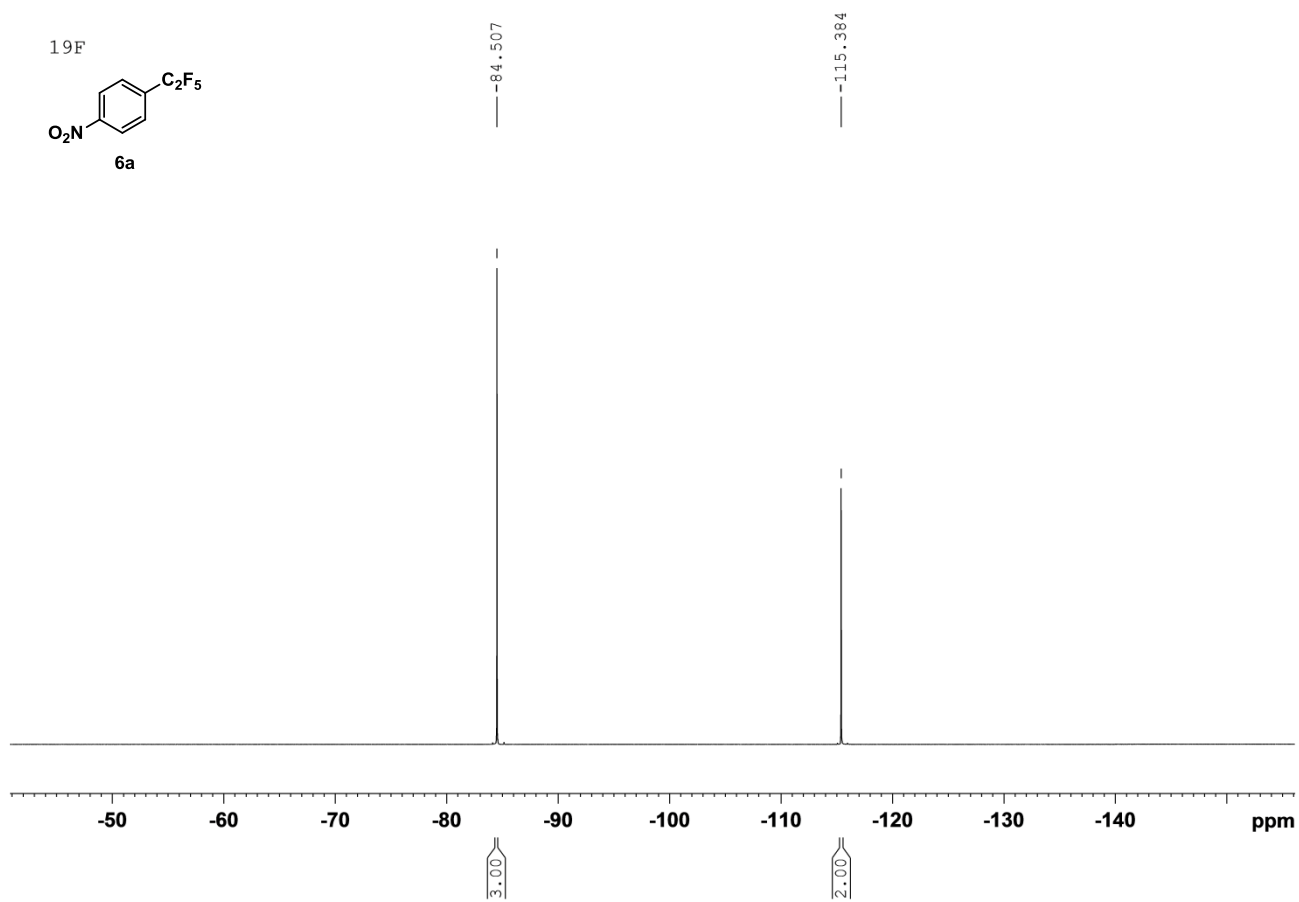

<sup>1</sup>H

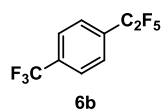

7.8034  
7.7743  
7.7598  
7.7305

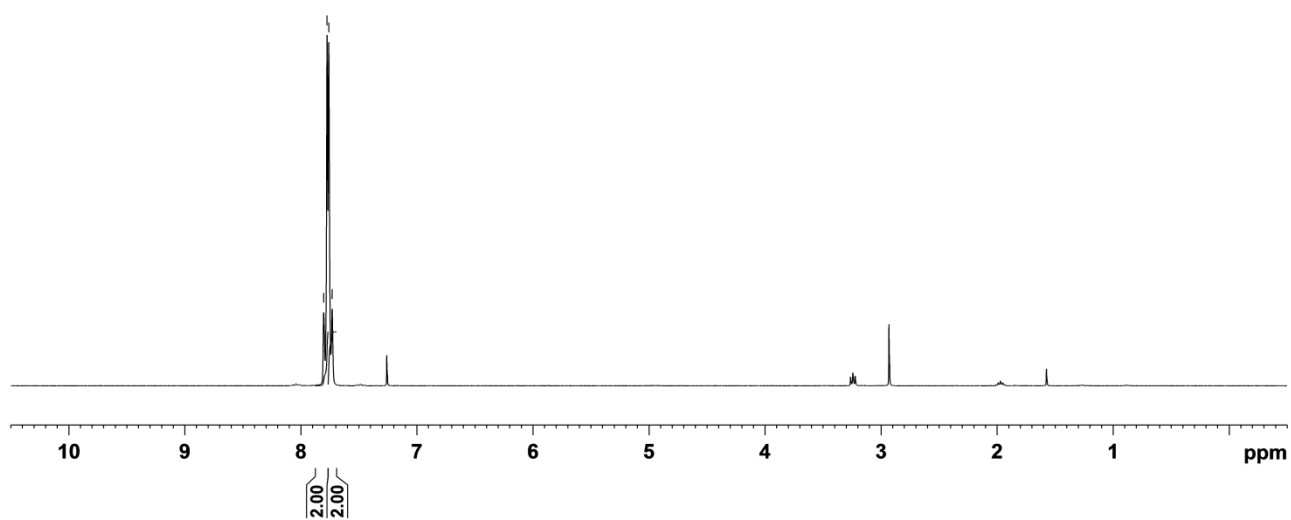

<sup>13</sup>C

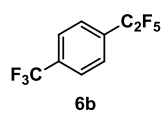

134.81  
134.37  
133.94  
133.50  
133.10  
132.65  
132.01  
131.73  
131.29  
131.00  
130.94  
130.89  
130.84  
130.79  
130.75  
130.70  
130.65  
130.60  
130.55  
130.50  
130.45  
130.40  
130.35  
130.30  
130.25  
130.20  
130.15  
130.10  
130.05  
129.95  
129.85  
129.75  
129.65  
129.55  
129.45  
129.35  
129.25  
129.15  
129.05  
128.95  
128.85  
128.75  
128.65  
128.55  
128.45  
128.35  
128.25  
128.15  
128.05  
127.95  
127.85  
127.75  
127.65  
127.55  
127.45  
127.35  
127.25  
127.15  
127.05  
126.95  
126.85  
126.75  
126.65  
126.55  
126.45  
126.35  
126.25  
126.15  
126.05  
125.95  
125.85  
125.75  
125.65  
125.55  
125.45  
125.35  
125.25  
125.15  
125.05  
124.95  
124.85  
124.75  
124.65  
124.55  
124.45  
124.35  
124.25  
124.15  
124.05  
123.95  
123.85  
123.75  
123.65  
123.55  
123.45  
123.35  
123.25  
123.15  
123.05  
122.95  
122.85  
122.75  
122.65  
122.55  
122.45  
122.35  
122.25  
122.15  
122.05  
121.95  
121.85  
121.75  
121.65  
121.55  
121.45  
121.35  
121.25  
121.15  
121.05  
120.95  
120.85  
120.75  
120.65  
120.55  
120.45  
120.35  
120.25  
120.15  
120.05  
119.95  
119.85  
119.75  
119.65  
119.55  
119.45  
119.35  
119.25  
119.15  
119.05  
118.95  
118.85  
118.75  
118.65  
118.55  
118.45  
118.35  
118.25  
118.15  
118.05  
117.95  
117.85  
117.75  
117.65  
117.55  
117.45  
117.35  
117.25  
117.15  
117.05  
116.95  
116.85  
116.75  
116.65  
116.55  
116.45  
116.35  
116.25  
116.15  
116.05  
115.95  
115.85  
115.75  
115.65  
115.55  
115.45  
115.35  
115.25  
115.15  
115.05  
114.95  
114.85  
114.75  
114.65  
114.55  
114.45  
114.35  
114.25  
114.15  
114.05  
113.95  
113.85  
113.75  
113.65  
113.55  
113.45  
113.35  
113.25  
113.15  
113.05  
112.95  
112.85  
112.75  
112.65  
112.55  
112.45  
112.35  
112.25  
112.15  
112.05  
111.95  
111.85  
111.75  
111.65  
111.55  
111.45  
111.35  
111.25  
111.15  
111.05  
110.95  
110.85  
110.75  
110.65  
110.55  
110.45  
110.35  
110.25  
110.15  
110.05  
109.95  
109.85  
109.75  
109.65  
109.55  
109.45  
109.35  
109.25  
109.15  
109.05  
108.95  
108.85  
108.75  
108.65  
108.55  
108.45  
108.35  
108.25  
108.15  
108.05  
107.95  
107.85  
107.75  
107.65  
107.55  
107.45  
107.35  
107.25  
107.15  
107.05  
106.95  
106.85  
106.75  
106.65  
106.55  
106.45  
106.35  
106.25  
106.15  
106.05  
105.95  
105.85  
105.75  
105.65  
105.55  
105.45  
105.35  
105.25  
105.15  
105.05  
104.95  
104.85  
104.75  
104.65  
104.55  
104.45  
104.35  
104.25  
104.15  
104.05  
103.95  
103.85  
103.75  
103.65  
103.55  
103.45  
103.35  
103.25  
103.15  
103.05  
102.95  
102.85  
102.75  
102.65  
102.55  
102.45  
102.35  
102.25  
102.15  
102.05  
101.95  
101.85  
101.75  
101.65  
101.55  
101.45  
101.35  
101.25  
101.15  
101.05  
100.95  
100.85  
100.75  
100.65  
100.55  
100.45  
100.35  
100.25  
100.15  
100.05  
99.95  
99.85  
99.75  
99.65  
99.55  
99.45  
99.35  
99.25  
99.15  
99.05  
98.95  
98.85  
98.75  
98.65  
98.55  
98.45  
98.35  
98.25  
98.15  
98.05  
97.95  
97.85  
97.75  
97.65  
97.55  
97.45  
97.35  
97.25  
97.15  
97.05  
96.95  
96.85  
96.75  
96.65  
96.55  
96.45  
96.35  
96.25  
96.15  
96.05  
95.95  
95.85  
95.75  
95.65  
95.55  
95.45  
95.35  
95.25  
95.15  
95.05  
94.95  
94.85  
94.75  
94.65  
94.55  
94.45  
94.35  
94.25  
94.15  
94.05  
93.95  
93.85  
93.75  
93.65  
93.55  
93.45  
93.35  
93.25  
93.15  
93.05  
92.95  
92.85  
92.75  
92.65  
92.55  
92.45  
92.35  
92.25  
92.15  
92.05  
91.95  
91.85  
91.75  
91.65  
91.55  
91.45  
91.35  
91.25  
91.15  
91.05  
90.95  
90.85  
90.75  
90.65  
90.55  
90.45  
90.35  
90.25  
90.15  
90.05  
89.95  
89.85  
89.75  
89.65  
89.55  
89.45  
89.35  
89.25  
89.15  
89.05  
88.95  
88.85  
88.75  
88.65  
88.55  
88.45  
88.35  
88.25  
88.15  
88.05  
87.95  
87.85  
87.75  
87.65  
87.55  
87.45  
87.35  
87.25  
87.15  
87.05  
86.95  
86.85  
86.75  
86.65  
86.55  
86.45  
86.35  
86.25  
86.15  
86.05  
85.95  
85.85  
85.75  
85.65  
85.55  
85.45  
85.35  
85.25  
85.15  
85.05  
84.95  
84.85  
84.75  
84.65  
84.55  
84.45  
84.35  
84.25  
84.15  
84.05  
83.95  
83.85  
83.75  
83.65  
83.55  
83.45  
83.35  
83.25  
83.15  
83.05  
82.95  
82.85  
82.75  
82.65  
82.55  
82.45  
82.35  
82.25  
82.15  
82.05  
81.95  
81.85  
81.75  
81.65  
81.55  
81.45  
81.35  
81.25  
81.15  
81.05  
80.95  
80.85  
80.75  
80.65  
80.55  
80.45  
80.35  
80.25  
80.15  
80.05  
79.95  
79.85  
79.75  
79.65  
79.55  
79.45  
79.35  
79.25  
79.15  
79.05  
78.95  
78.85  
78.75  
78.65  
78.55  
78.45  
78.35  
78.25  
78.15  
78.05  
77.95  
77.85  
77.75  
77.65  
77.55  
77.45  
77.35  
77.25  
77.15  
77.05  
76.95  
76.85  
76.75  
76.65  
76.55  
76.45  
76.35  
76.25  
76.15  
76.05  
75.95  
75.85  
75.75  
75.65  
75.55  
75.45  
75.35  
75.25  
75.15  
75.05  
74.95  
74.85  
74.75  
74.65  
74.55  
74.45  
74.35  
74.25  
74.15  
74.05  
73.95  
73.85  
73.75  
73.65  
73.55  
73.45  
73.35  
73.25  
73.15  
73.05  
72.95  
72.85  
72.75  
72.65  
72.55  
72.45  
72.35  
72.25  
72.15  
72.05  
71.95  
71.85  
71.75  
71.65  
71.55  
71.45  
71.35  
71.25  
71.15  
71.05  
70.95  
70.85  
70.75  
70.65  
70.55  
70.45  
70.35  
70.25  
70.15  
70.05  
69.95  
69.85  
69.75  
69.65  
69.55  
69.45  
69.35  
69.25  
69.15  
69.05  
68.95  
68.85  
68.75  
68.65  
68.55  
68.45  
68.35  
68.25  
68.15  
68.05  
67.95  
67.85  
67.75  
67.65  
67.55  
67.45  
67.35  
67.25  
67.15  
67.05  
66.95  
66.85  
66.75  
66.65  
66.55  
66.45  
66.35  
66.25  
66.15  
66.05  
65.95  
65.85  
65.75  
65.65  
65.55  
65.45  
65.35  
65.25  
65.15  
65.05  
64.95  
64.85  
64.75  
64.65  
64.55  
64.45  
64.35  
64.25  
64.15  
64.05  
63.95  
63.85  
63.75  
63.65  
63.55  
63.45  
63.35  
63.25  
63.15  
63.05  
62.95  
62.85  
62.75  
62.65  
62.55  
62.45  
62.35  
62.25  
62.15  
62.05  
61.95  
61.85  
61.75  
61.65  
61.55  
61.45  
61.35  
61.25  
61.15  
61.05  
60.95  
60.85  
60.75  
60.65  
60.55  
60.45  
60.35  
60.25  
60.15  
60.05  
59.95  
59.85  
59.75  
59.65  
59.55  
59.45  
59.35  
59.25  
59.15  
59.05  
58.95  
58.85  
58.75  
58.65  
58.55  
58.45  
58.35  
58.25  
58.15  
58.05  
57.95  
57.85  
57.75  
57.65  
57.55  
57.45  
57.35  
57.25  
57.15  
57.05  
56.95  
56.85  
56.75  
56.65  
56.55  
56.45  
56.35  
56.25  
56.15  
56.05  
55.95  
55.85  
55.75  
55.65  
55.55  
55.45  
55.35  
55.25  
55.15  
55.05  
54.95  
54.85  
54.75  
54.65  
54.55  
54.45  
54.35  
54.25  
54.15  
54.05  
53.95  
53.85  
53.75  
53.65  
53.55  
53.45  
53.35  
53.25  
53.15  
53.05  
52.95  
52.85  
52.75  
52.65  
52.55  
52.45  
52.35  
52.25  
52.15  
52.05  
51.95  
51.85  
51.75  
51.65  
51.55  
51.45  
51.35  
51.25  
51.15  
51.05  
50.95  
50.85  
50.75  
50.65  
50.55  
50.45  
50.35  
50.25  
50.15  
50.05  
49.95  
49.85  
49.75  
49.65  
49.55  
49.45  
49.35  
49.25  
49.15  
49.05  
48.95  
48.85  
48.75  
48.65  
48.55  
48.45  
48.35  
48.25  
48.15  
48.05  
47.95  
47.85  
47.75  
47.65  
47.55  
47.45  
47.35  
47.25  
47.15  
47.05  
46.95  
46.85  
46.75  
46.65  
46.55  
46.45  
46.35  
46.25  
46.15  
46.05  
45.95  
45.85  
45.75  
45.65  
45.55  
45.45  
45.35  
45.25  
45.15  
45.05  
44.95  
44.85  
44.75  
44.65  
44.55  
44.45  
44.35  
44.25  
44.15  
44.05  
43.95  
43.85  
43.75  
43.65  
43.55  
43.45  
43.35  
43.25  
43.15  
43.05  
42.95  
42.85  
42.75  
42.65  
42.55  
42.45  
42.35  
42.25  
42.15  
42.05  
41.95  
41.85  
41.75  
41.65  
41.55  
41.45  
41.35  
41.25  
41.15  
41.05  
40.95  
40.85  
40.75  
40.65  
40.55  
40.45  
40.35  
40.25  
40.15  
40.05  
39.95  
39.85  
39.75  
39.65  
39.55  
39.45  
39.35  
39.25  
39.15  
39.05  
38.95  
38.85  
38.75  
38.65  
38.55  
38.45  
38.35  
38.25  
38.15  
38.05  
37.95  
37.85  
37.75  
37.65  
37.55  
37.45  
37.35  
37.25  
37.15  
37.05  
36.95  
36.85  
36.75  
36.65  
36.55  
36.45  
36.35  
36.25  
36.15  
36.05  
35.95  
35.85  
35.75  
35.65  
35.55  
35.45  
35.35  
35.25  
35.15  
35.05  
34.95  
34.85  
34.75  
34.65  
34.55  
34.45  
34.35  
34.25  
34.15  
34.05  
33.95  
33.85  
33.75  
33.65  
33.55  
33.45  
33.35  
33.25  
33.15  
33.05  
32.95  
32.85  
32.75  
32.65  
32.55  
32.45  
32.35  
32.25  
32.15  
32.05  
31.95  
31.85  
31.75  
31.65  
31.55  
31.45  
31.35  
31.25  
31.15  
31.05  
30.95  
30.85  
30.75  
30.65  
30.55  
30.45  
30.35  
30.25  
30.15  
30.05  
29.95  
29.85  
29.75  
29.65  
29.55  
29.45  
29.35  
29.25  
29.15  
29.05  
28.95  
28.85  
28.75  
28.65  
28.55  
28.45  
28.35  
28.25  
28.15  
28.05  
27.95  
27.85  
27.75  
27.65  
27.55  
27.45  
27.35  
27.25  
27.15  
27.05  
26.95  
26.85  
26.75  
26.65  
26.55  
26.45  
26.35  
26.25  
26.15  
26.05  
25.95  
25.85  
25.75  
25.65  
25.55  
25.45  
25.35  
25.25  
25.15  
25.05  
24.95  
24.85  
24.75  
24.65  
24.55  
24.45  
24.35  
24.25  
24.15  
24.05  
23.95  
23.85  
23.75  
23.65  
23.55  
23.45  
23.35  
23.25  
23.15  
23.05  
22.95  
22.85  
22.75  
22.65  
22.55  
22.45  
22.35  
22.25  
22.15  
22.05  
21.95  
21.85  
21.75  
21.65  
21.55  
21.45  
21.35  
21.25  
21.15  
21.05  
20.95  
20.85  
20.75  
20.65  
20.55  
20.45  
20.35  
20.25  
20.15  
20.05  
19.95  
19.85  
19.75  
19.65  
19.55  
19.45  
19.35  
19.25  
19.15  
19.05  
18.95  
18.85  
18.75  
18.65  
18.55  
18.45  
18.35  
18.25  
18.15  
18.05  
17.95  
17.85  
17.75  
17.65  
17.55  
17.45  
17.35  
17.25  
17.15  
17.05  
16.95  
16.85  
16.75  
16.65  
16.55  
16.45  
16.35  
16.25  
16.15  
16.05  
15.95  
15.85  
15.75  
15.65  
15.55  
15.45  
15.35  
15.25  
15.15  
15.05  
14.95  
14.85  
14.75  
14.65  
14.55  
14.45  
14.35  
14.25  
14.15  
14.05  
13.95  
13.85  
13.75  
13.65  
13.55  
13.45  
13.35  
13.25  
13.15  
13.05  
12.95  
12.85  
12.75  
12.65  
12.55  
12.45  
12.35  
12.25  
12.15  
12.05  
11.95  
11.85  
11.75  
11.65  
11.55  
11.45  
11.35  
11.25  
11.15  
11.05  
10.95  
10.85  
10.75  
10.65  
10.55  
10.45  
10.35  
10.25  
10.15  
10.05  
9.95  
9.85  
9.75  
9.65  
9.55  
9.45  
9.35  
9.25  
9.15  
9.05  
8.95  
8.85  
8.75  
8.65  
8.55  
8.45  
8.35  
8.25  
8.15  
8.05  
7.95  
7.85  
7.75  
7.65  
7.55  
7.45  
7.35  
7.25  
7.15  
7.05  
6.95  
6.85  
6.75  
6.65  
6.55  
6.45  
6.35  
6.25  
6.15  
6.05  
5.95  
5.85  
5.75  
5.65  
5.55  
5.45  
5.35  
5.25  
5.15  
5.05  
4.95  
4.85  
4.75  
4.65  
4.55  
4.45  
4.35  
4.25  
4.15  
4.05  
3.95  
3.85  
3.75  
3.65  
3.55  
3.45  
3.35  
3.25  
3.15  
3.05  
2.95  
2.85  
2.75  
2.65  
2.55  
2.45  
2.35  
2.25  
2.15  
2.05  
1.95  
1.85  
1.75  
1.65  
1.55  
1.45  
1.35  
1.25  
1.15  
1.05  
1.00  
0.95  
0.90  
0.85  
0.80  
0.75  
0.70  
0.65  
0.60  
0.55  
0.50  
0.45  
0.40  
0.35  
0.30  
0.25  
0.20  
0.15  
0.10  
0.05  
0.00

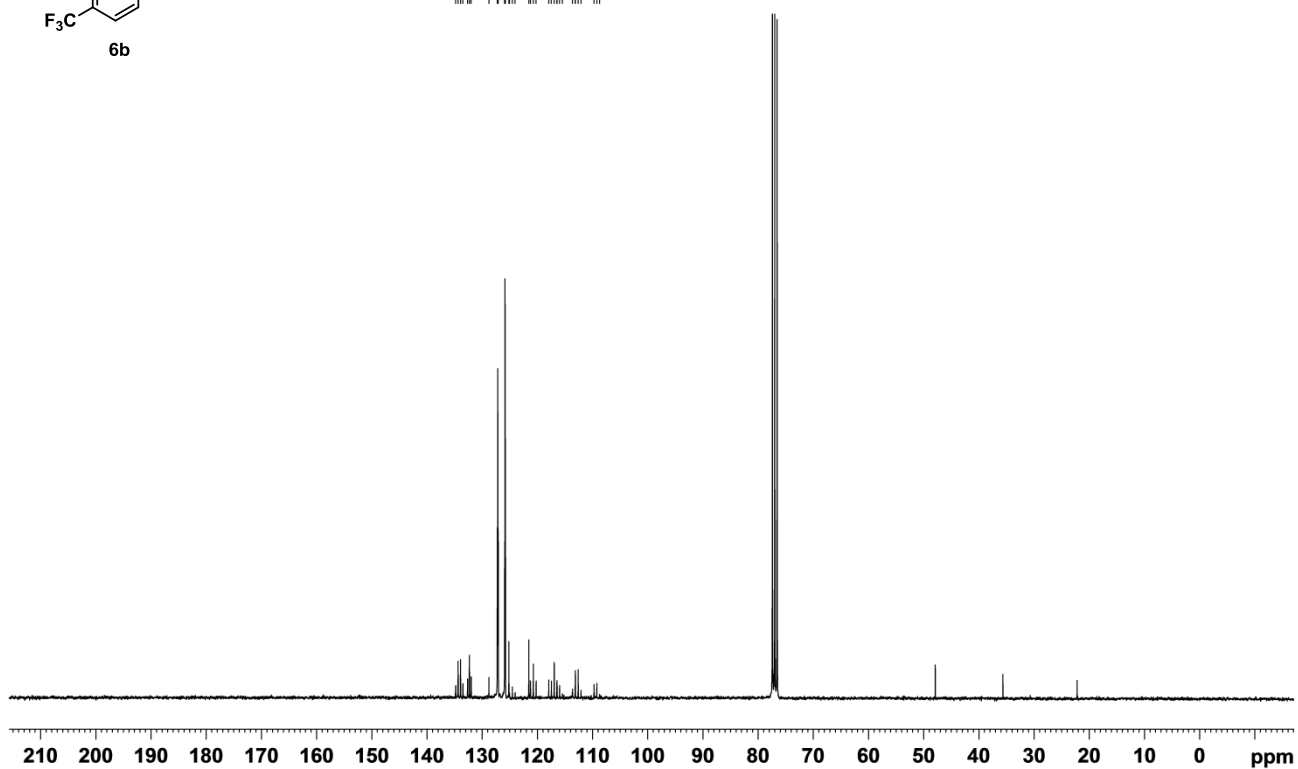

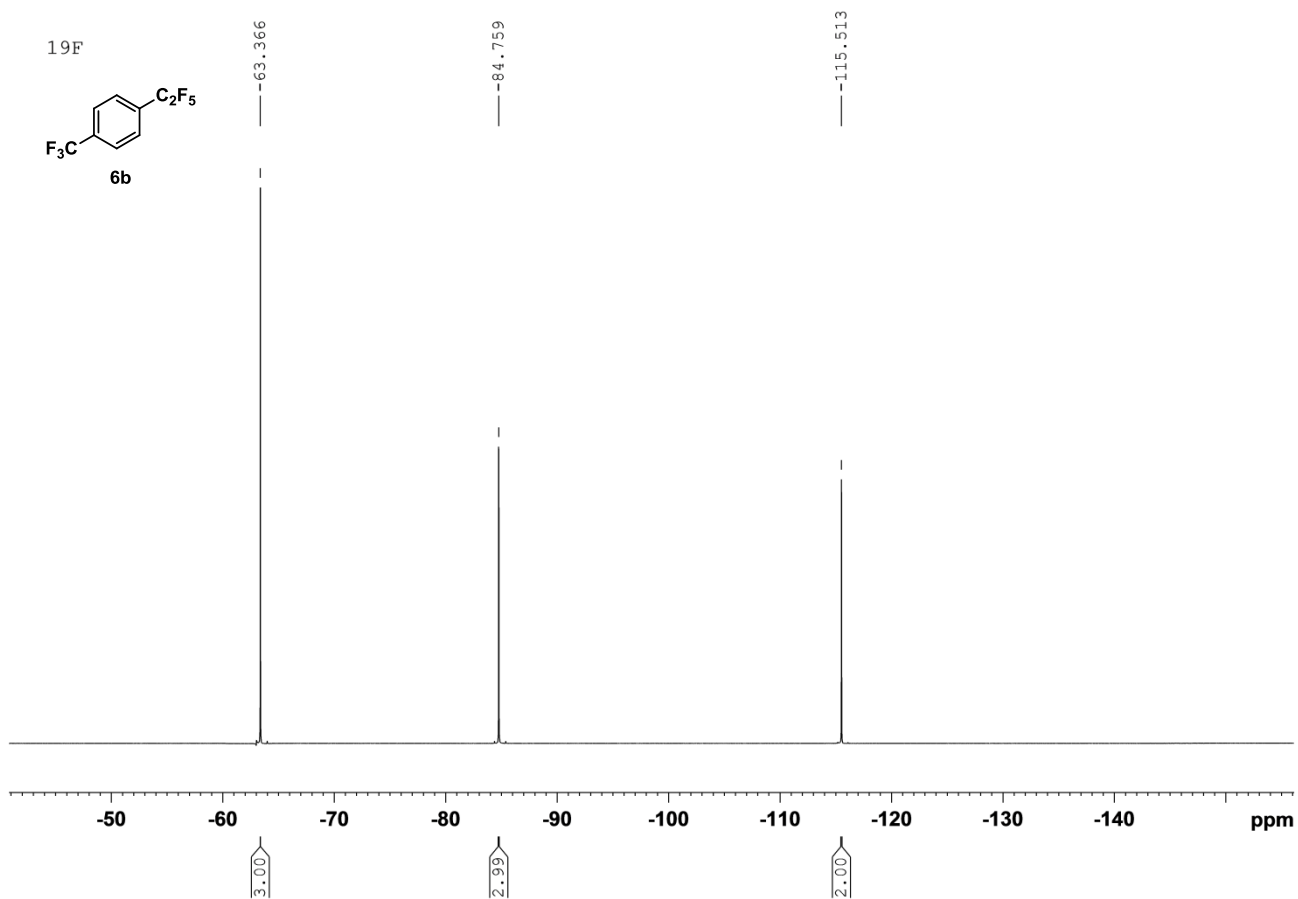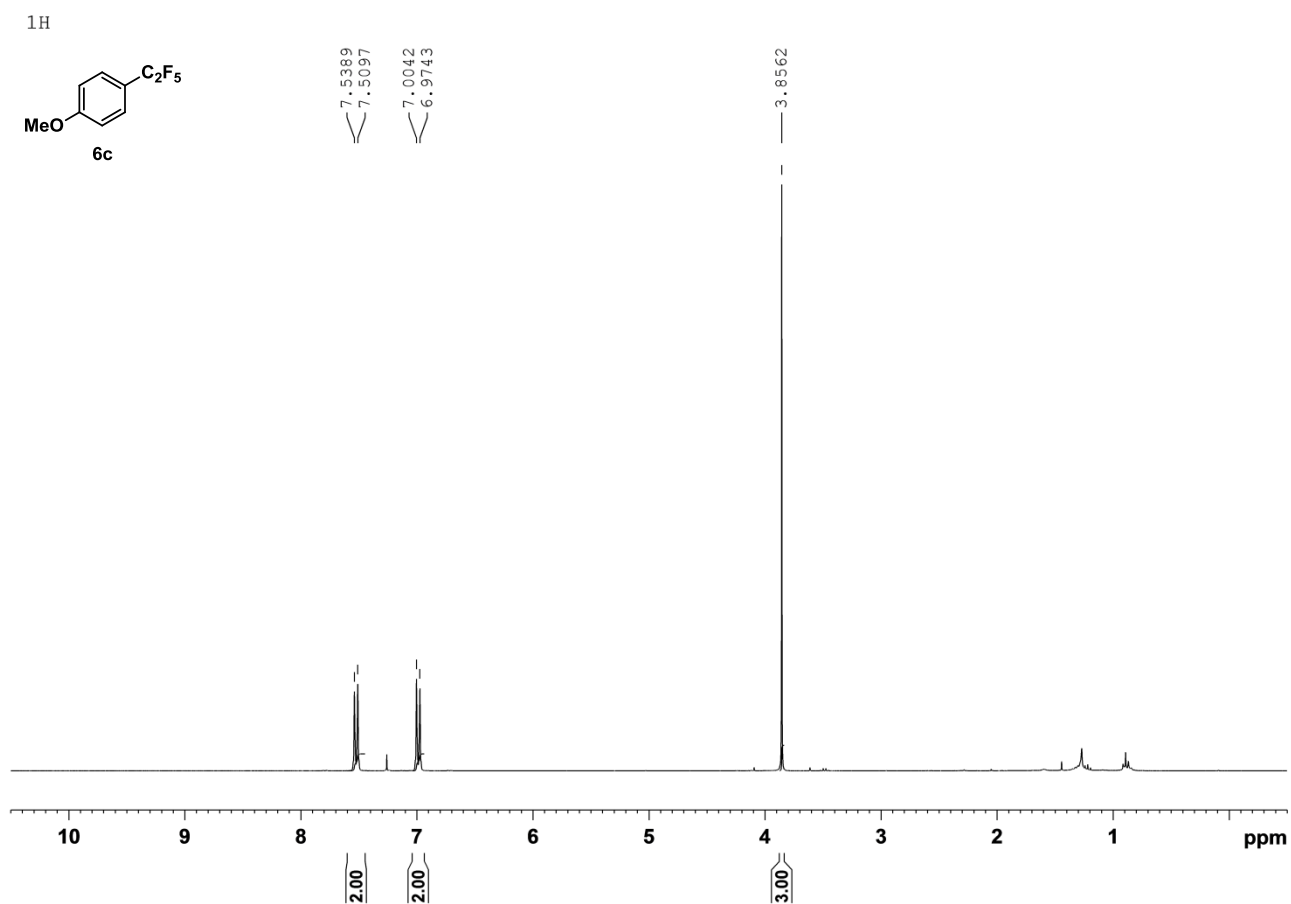

<sup>13</sup>C

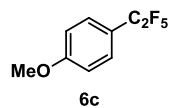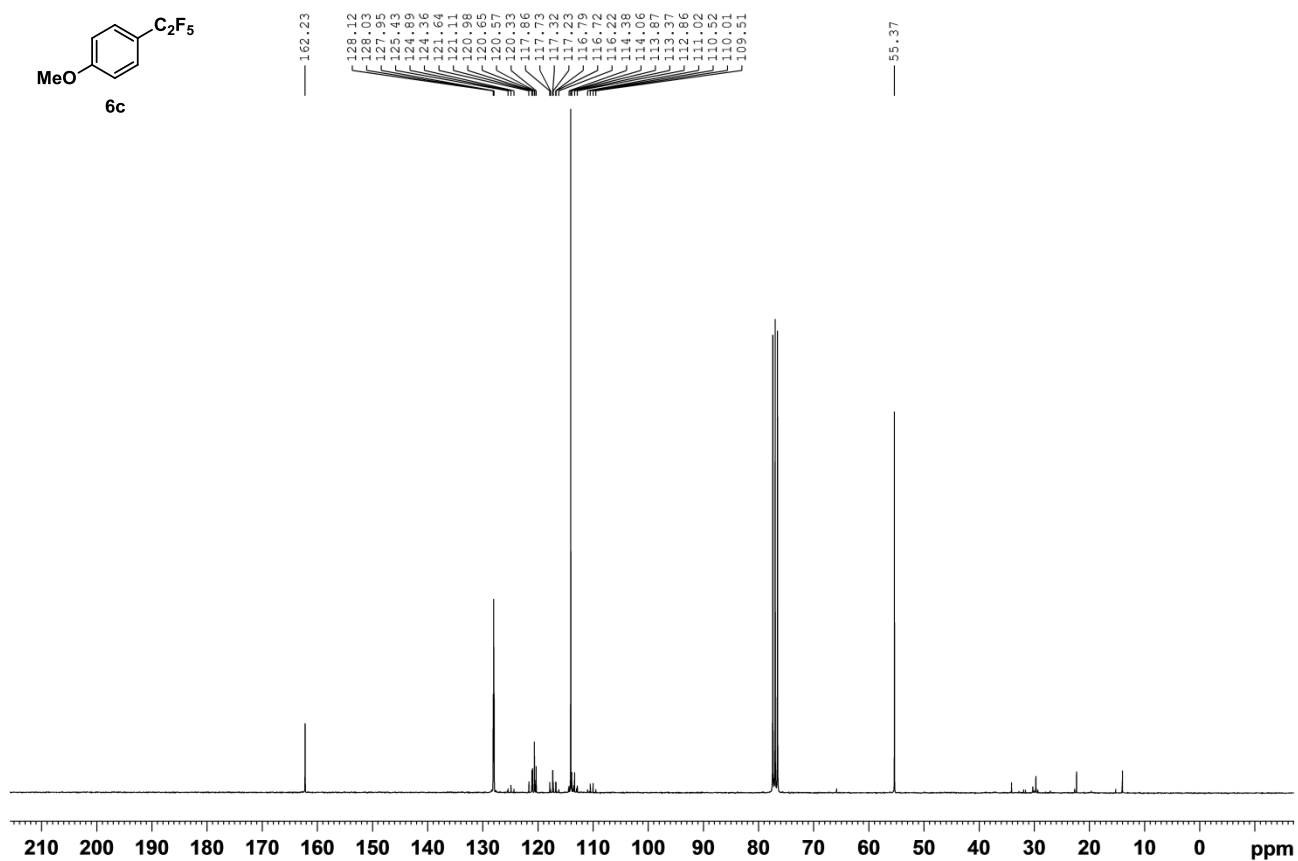

<sup>19</sup>F

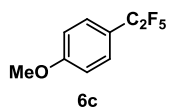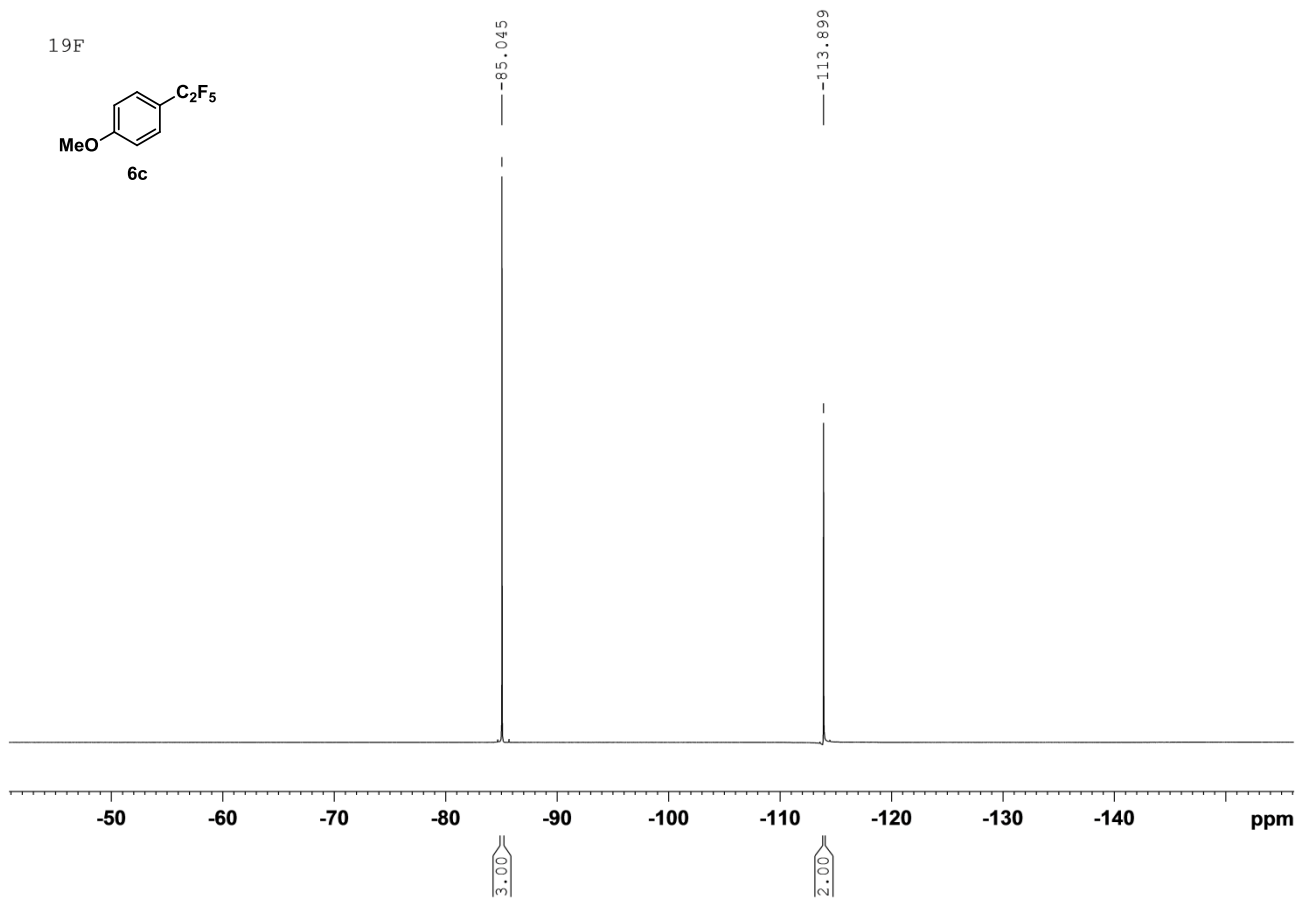

<sup>1</sup>H

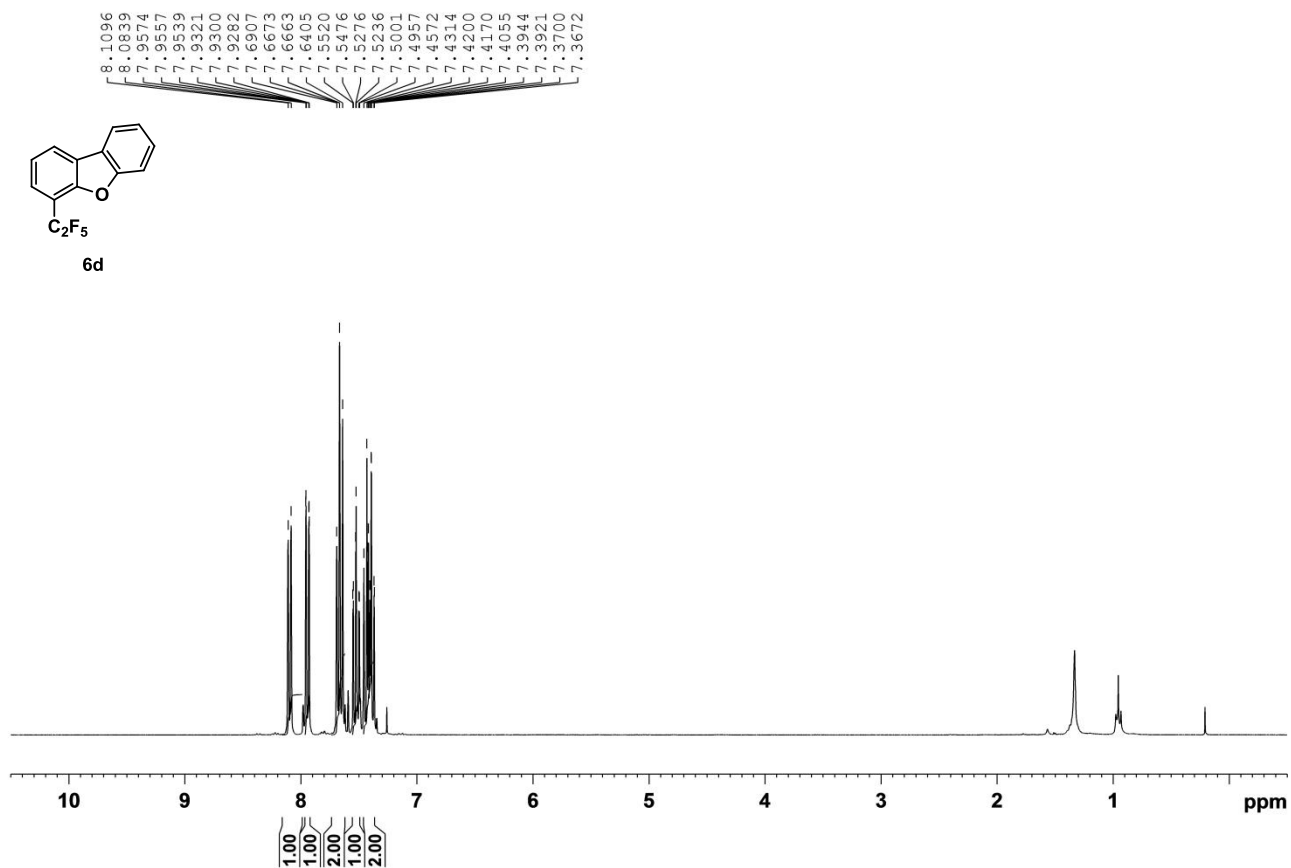

<sup>13</sup>C

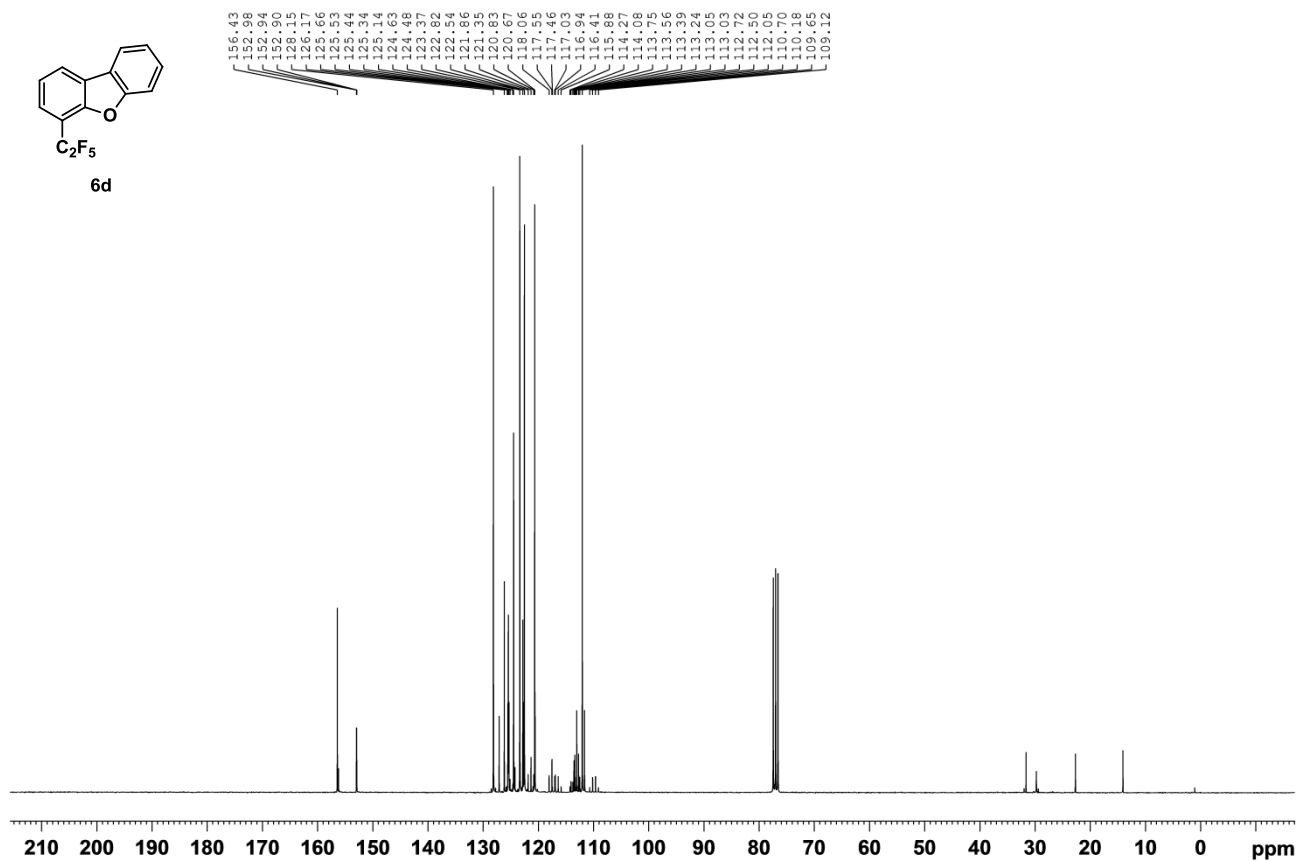

$^{19}\text{F}$

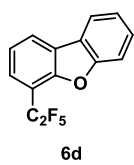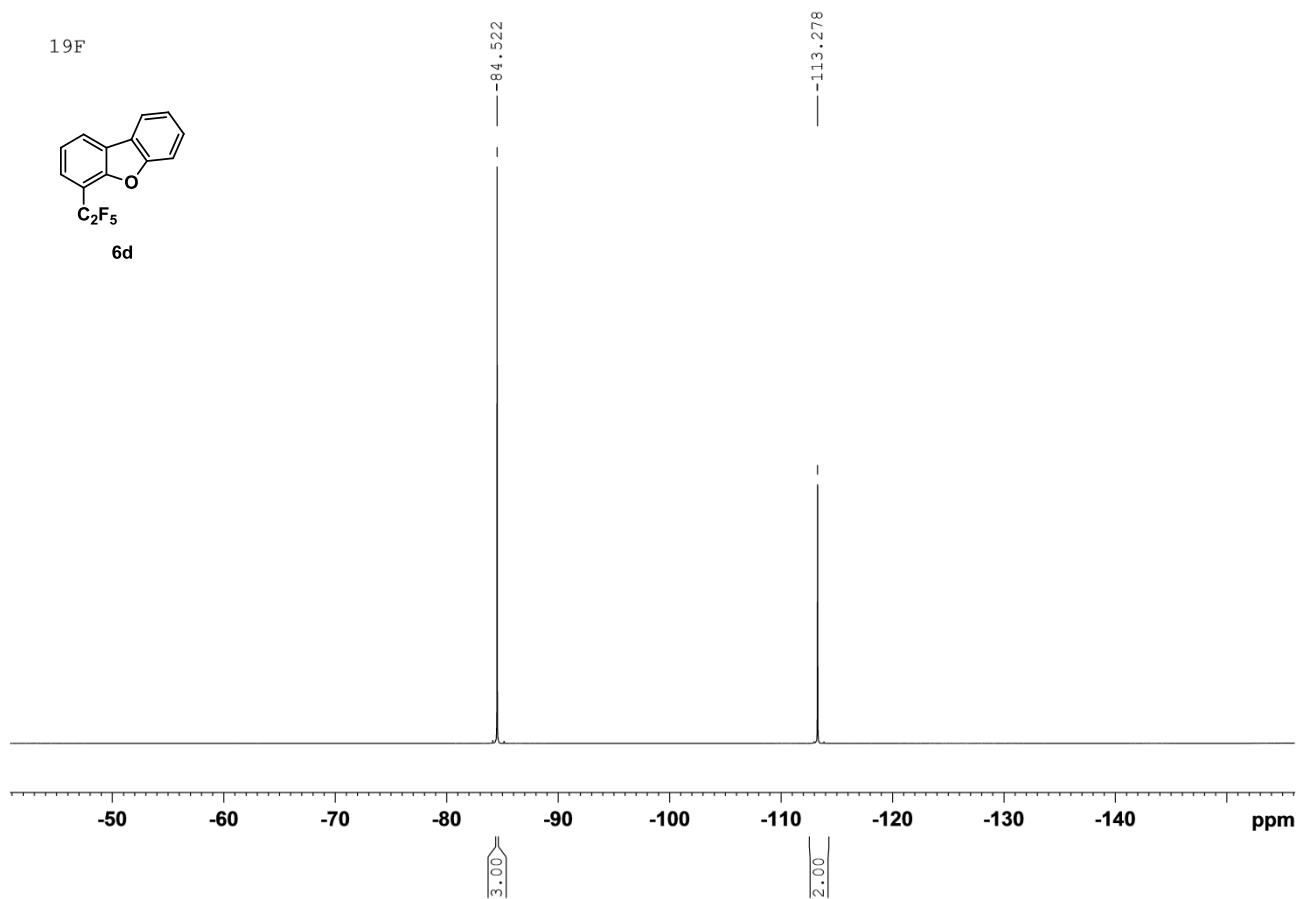

$^1\text{H}$

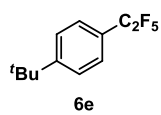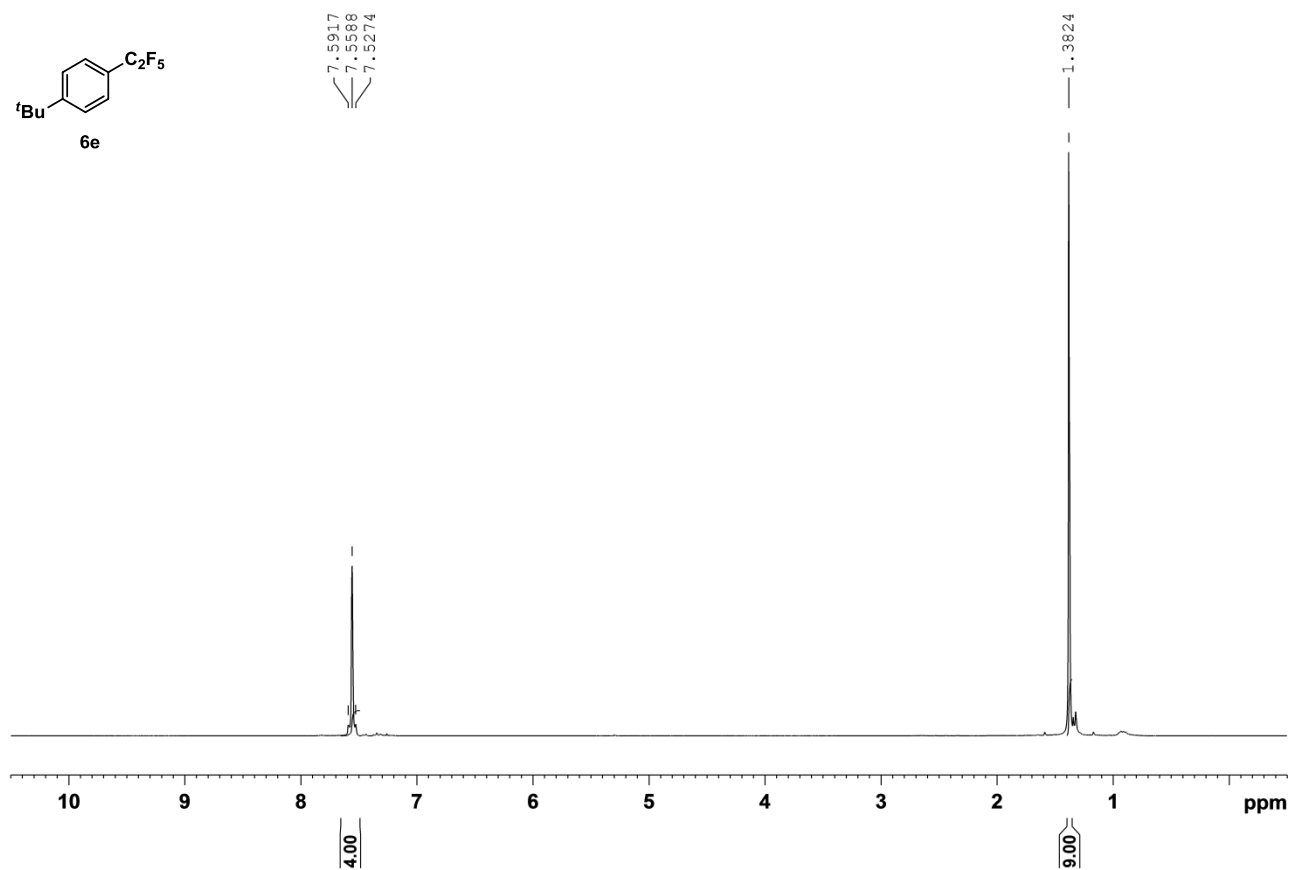



<sup>13</sup>C

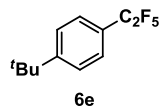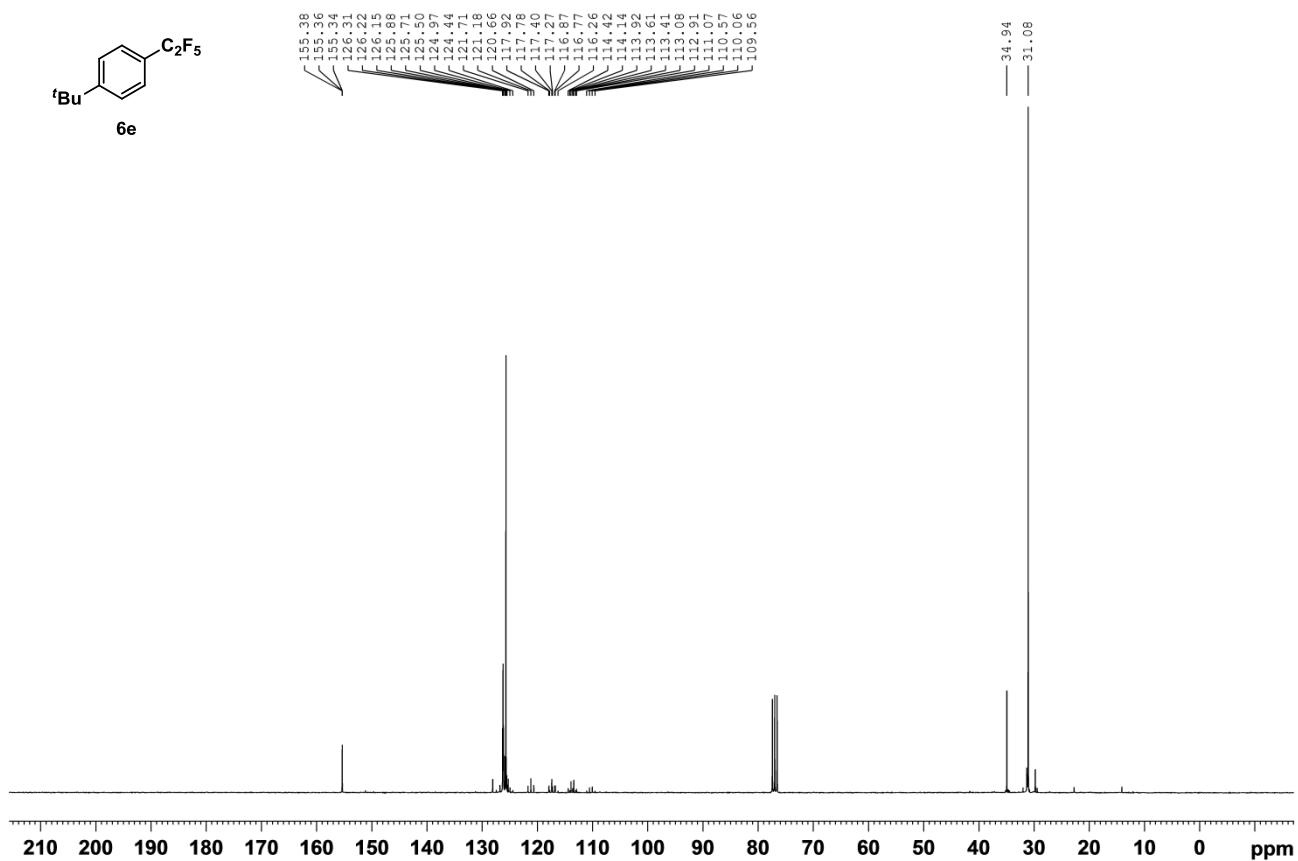

<sup>19</sup>F

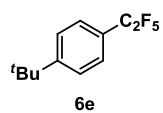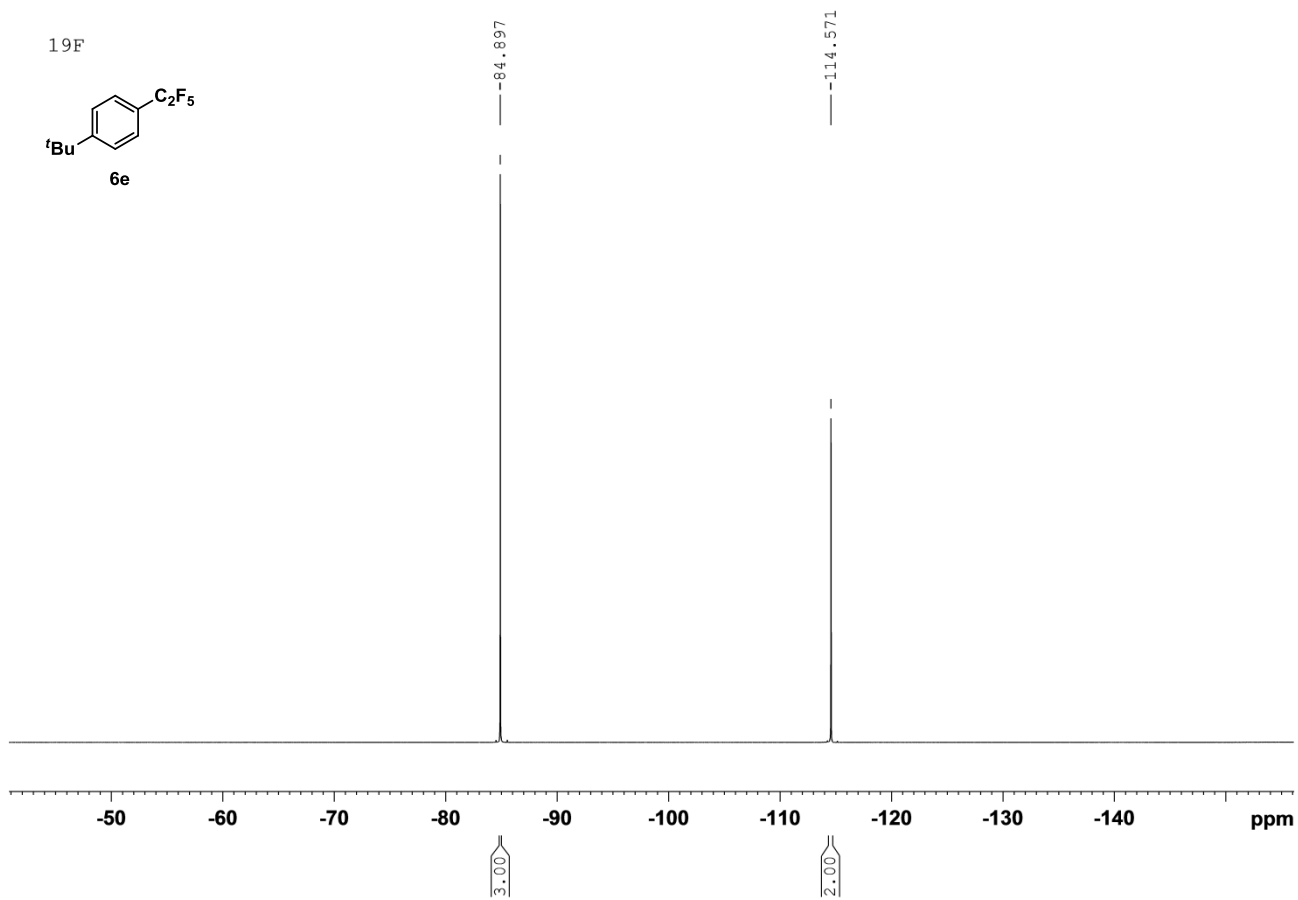

<sup>1</sup>H

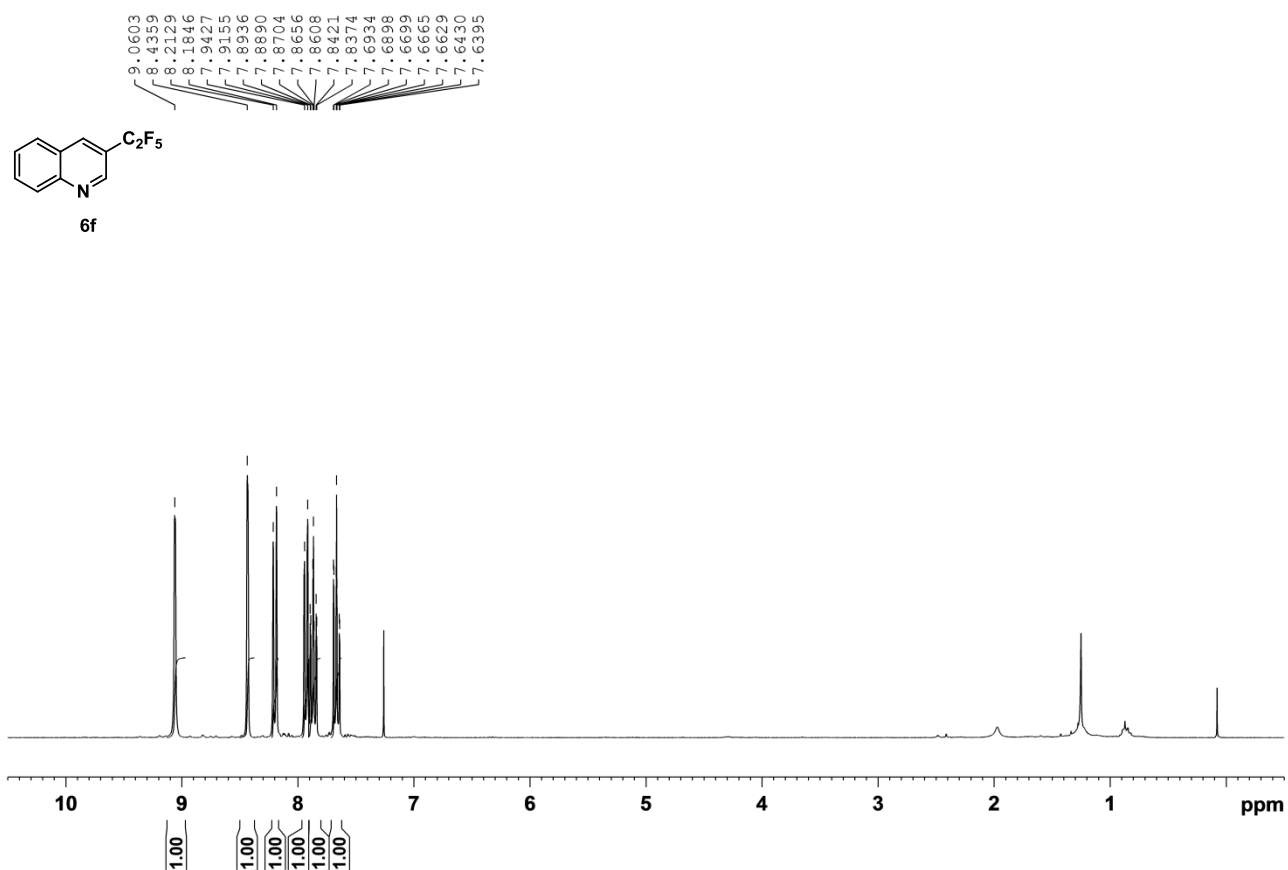

<sup>13</sup>C

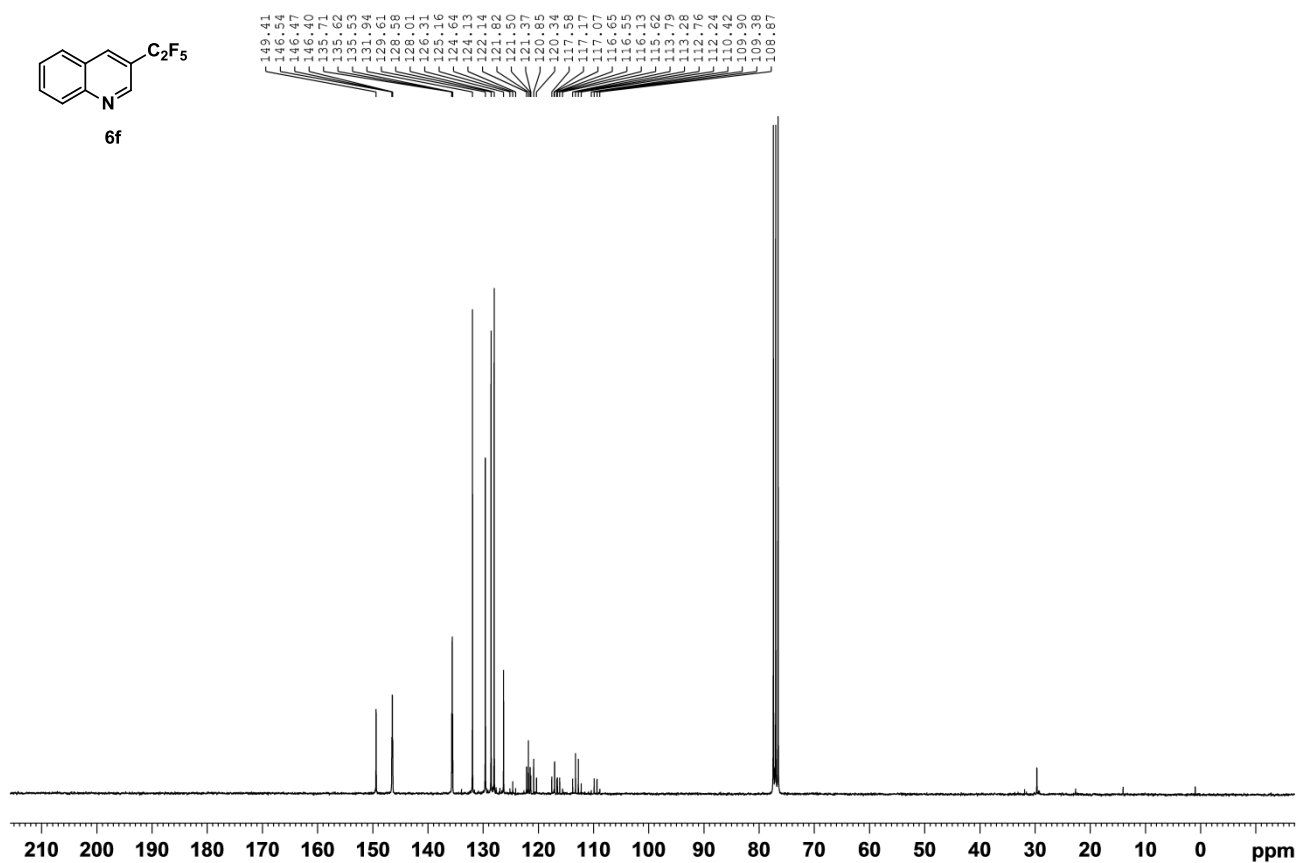

<sup>19</sup>F

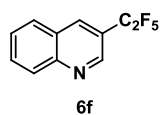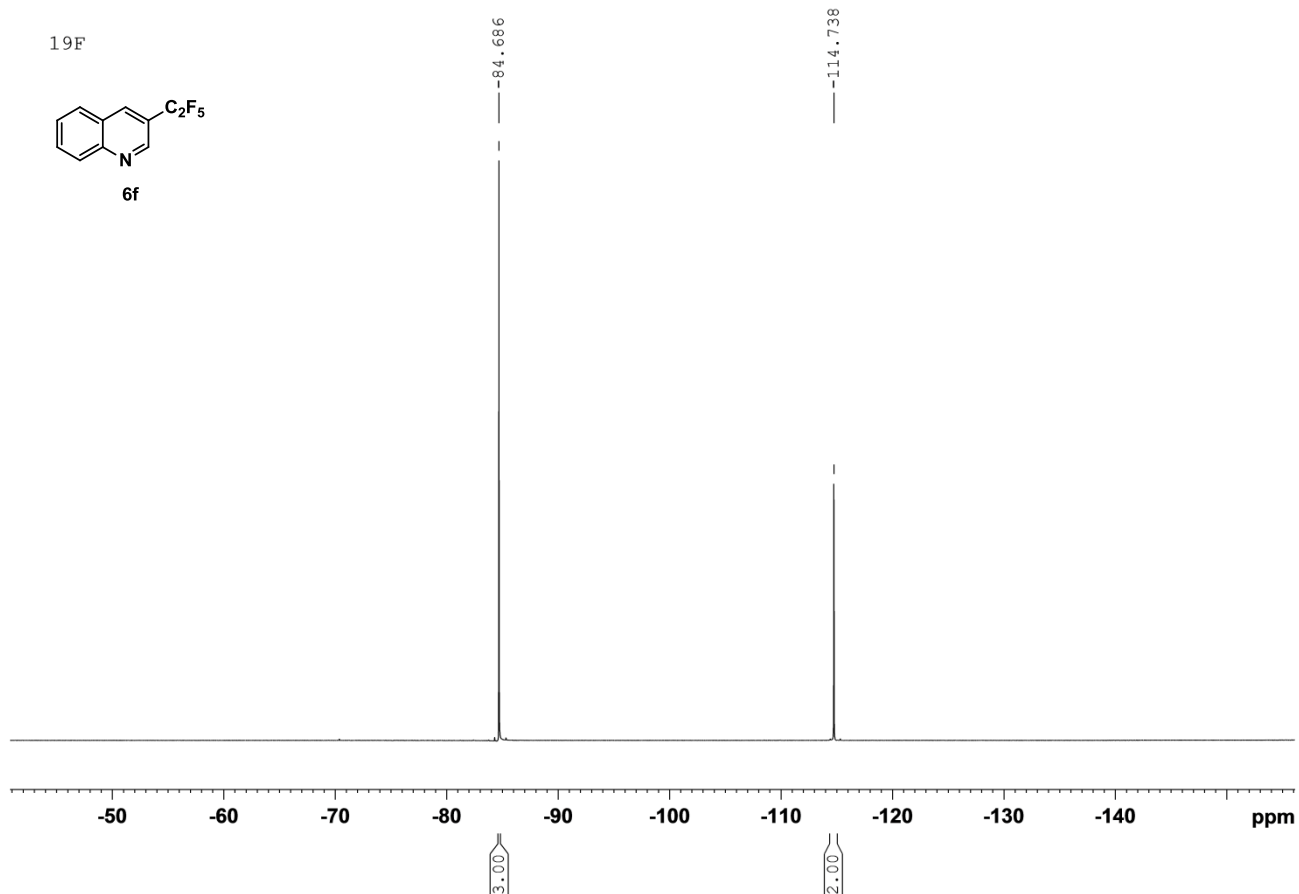

<sup>1</sup>H

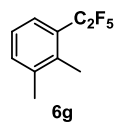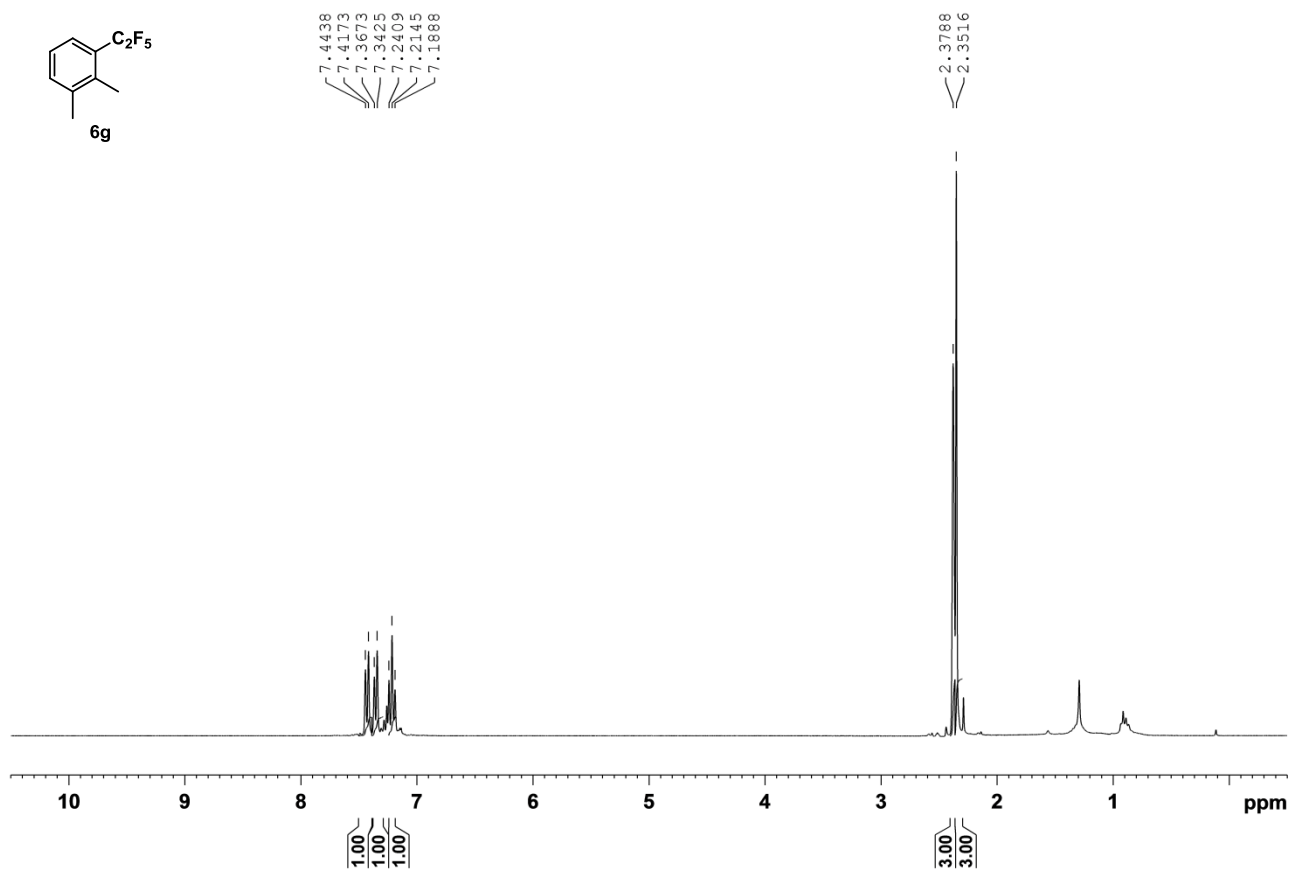

<sup>13</sup>C

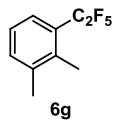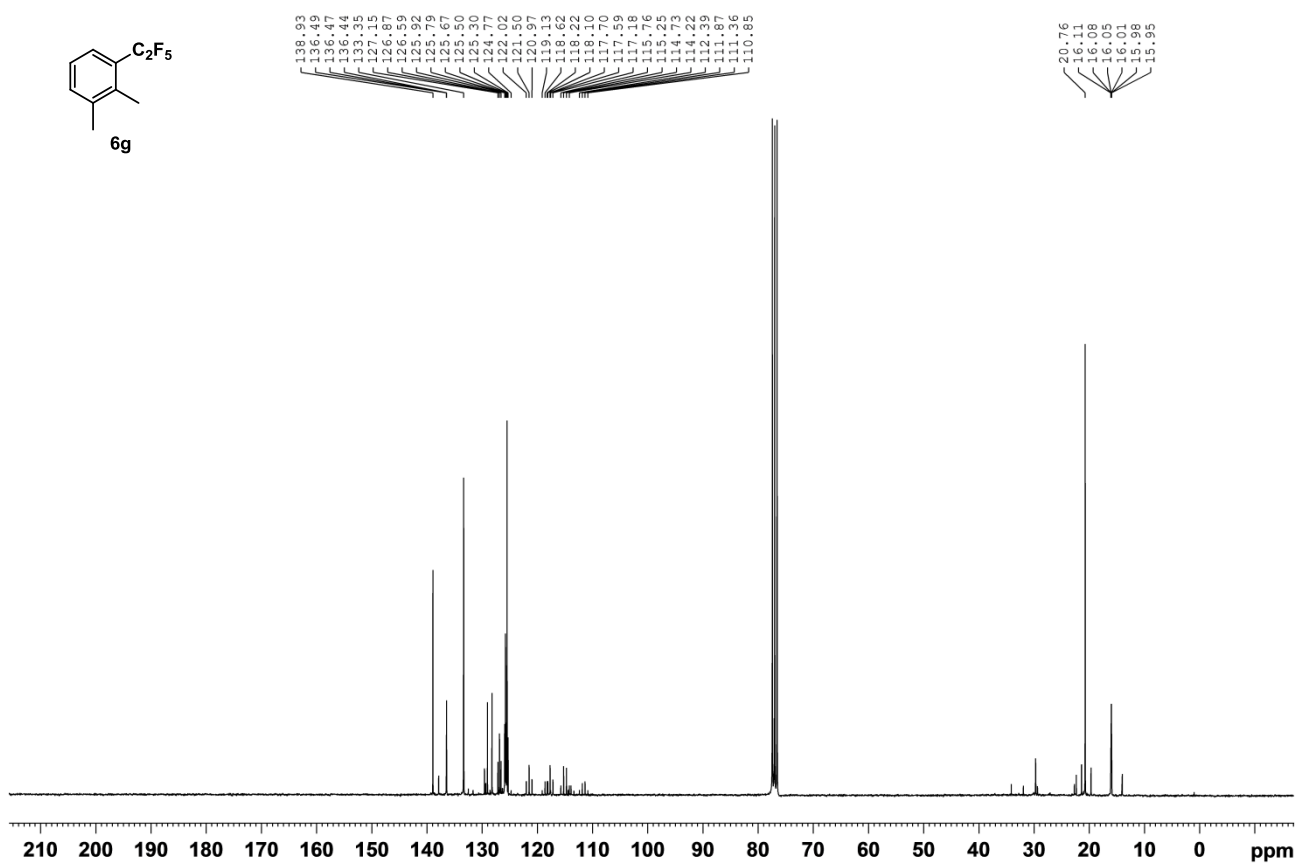

<sup>19</sup>F

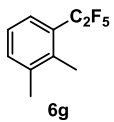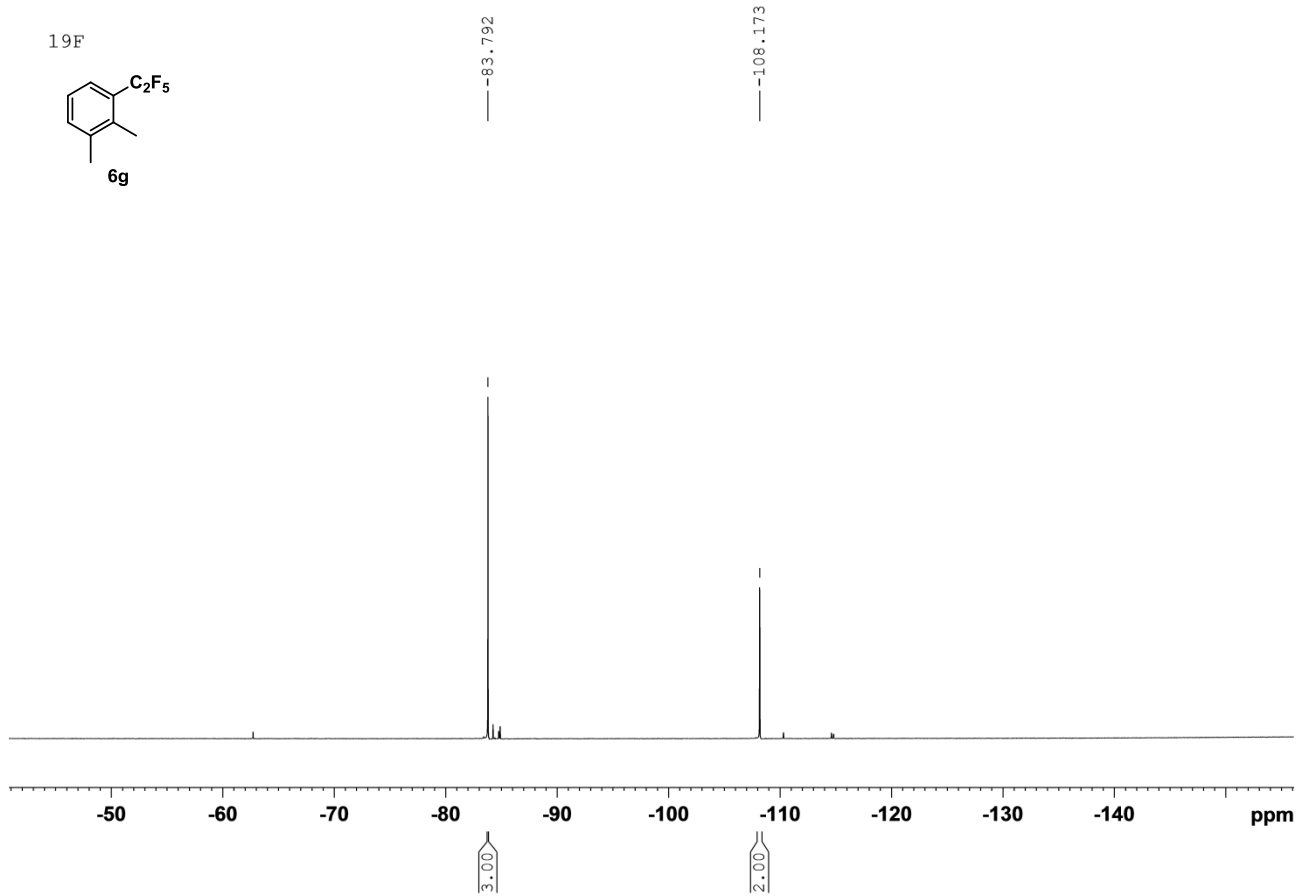

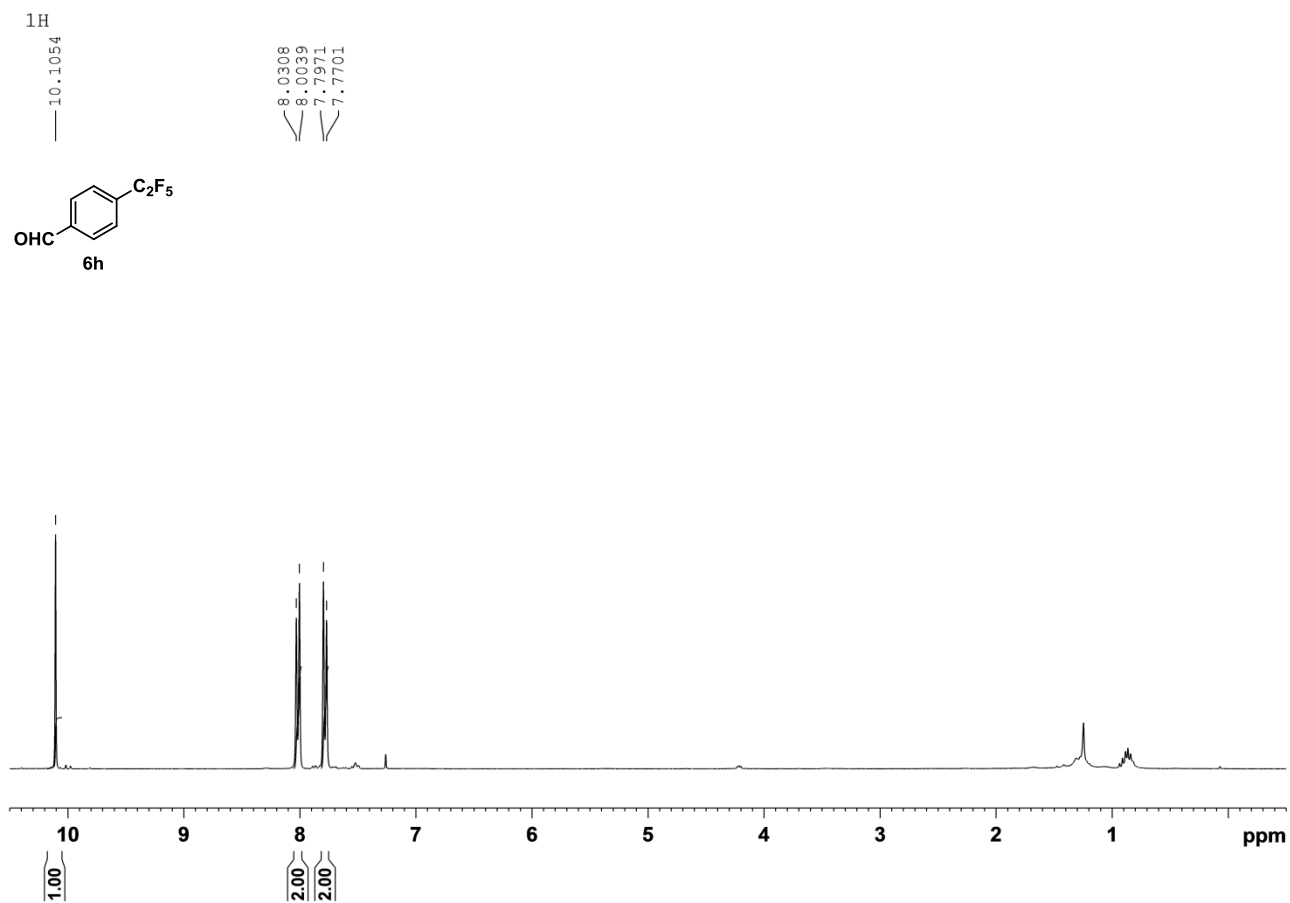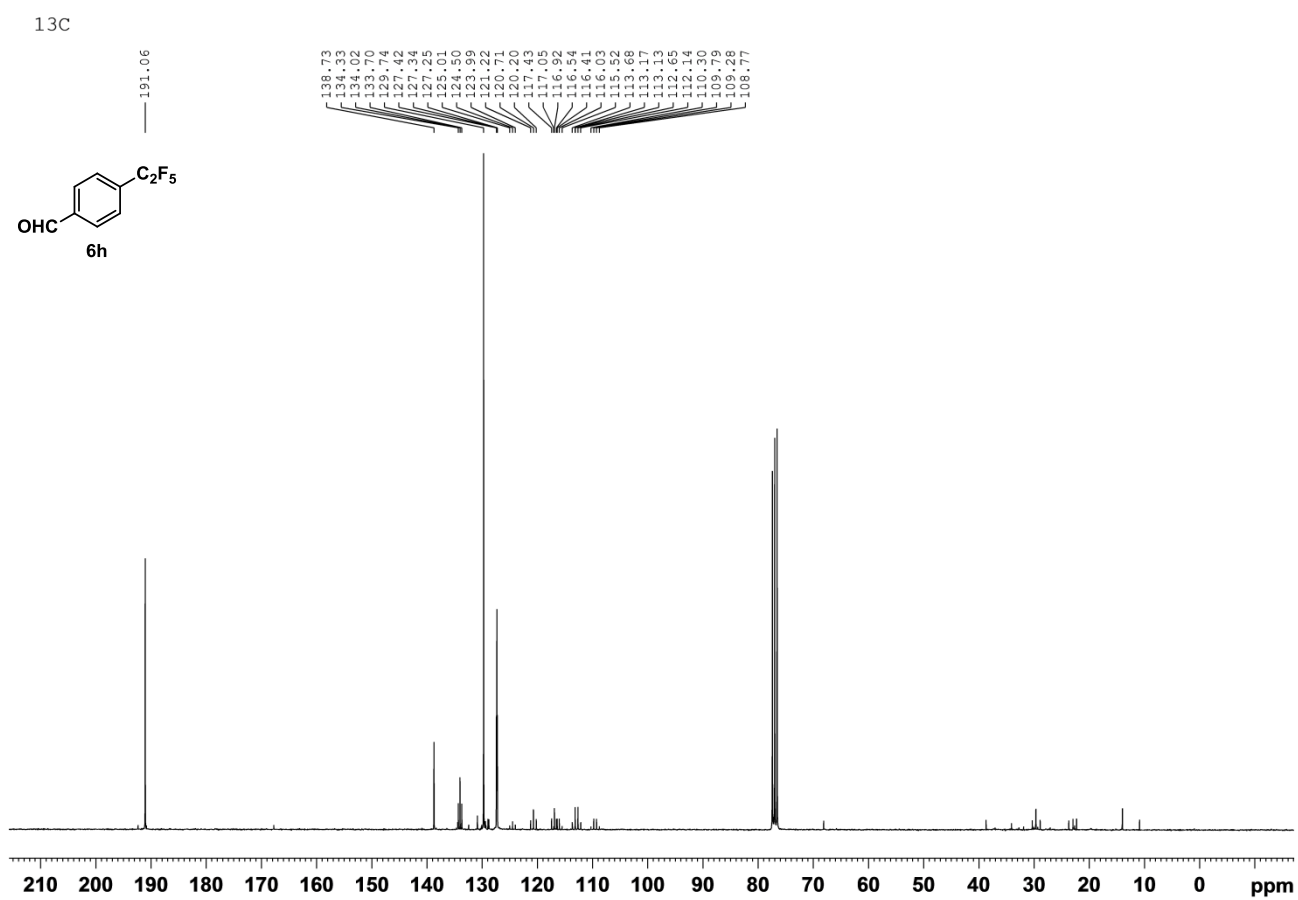

<sup>19</sup>F

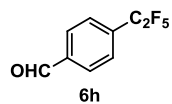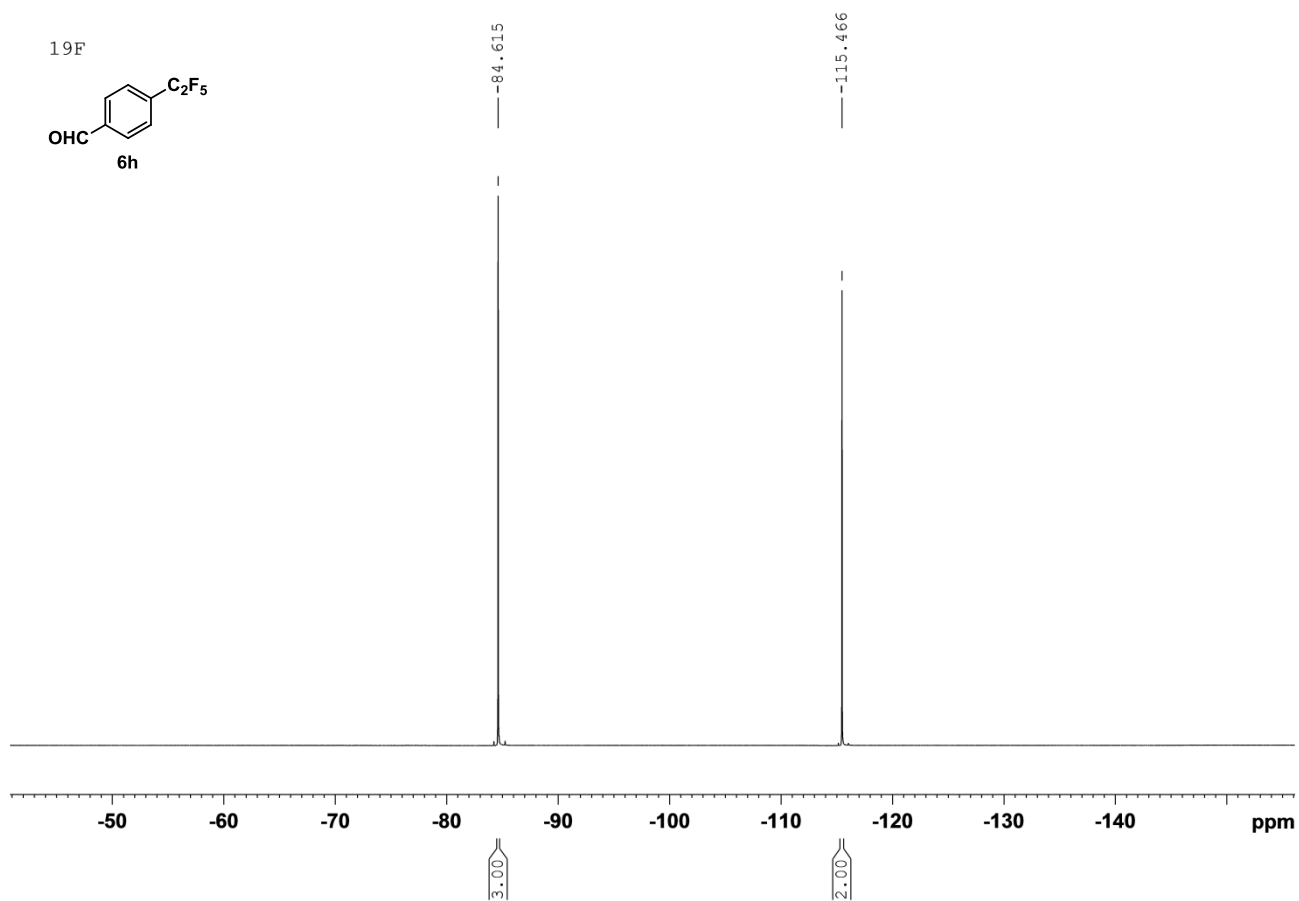

<sup>1</sup>H

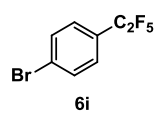

7.6690  
7.6412  
7.6554  
7.4574

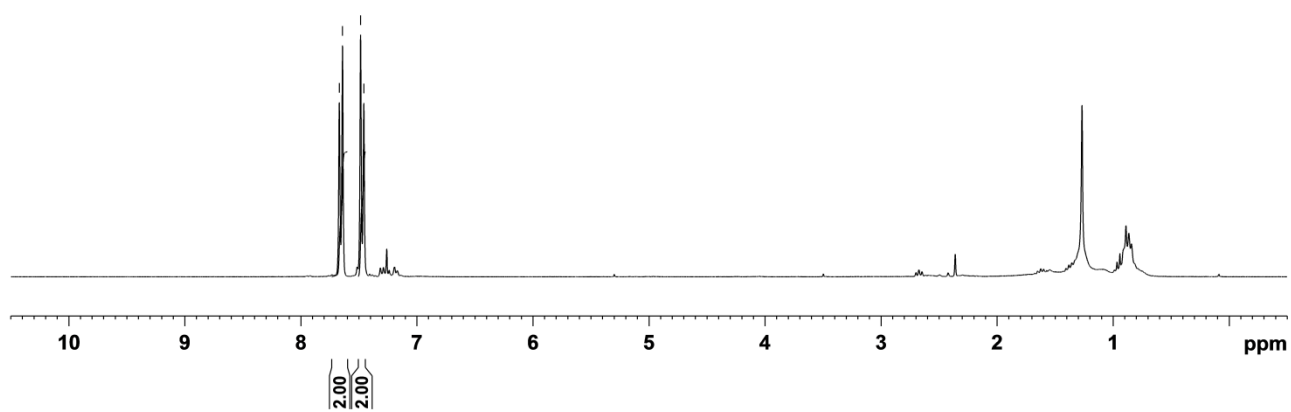

<sup>13</sup>C

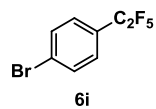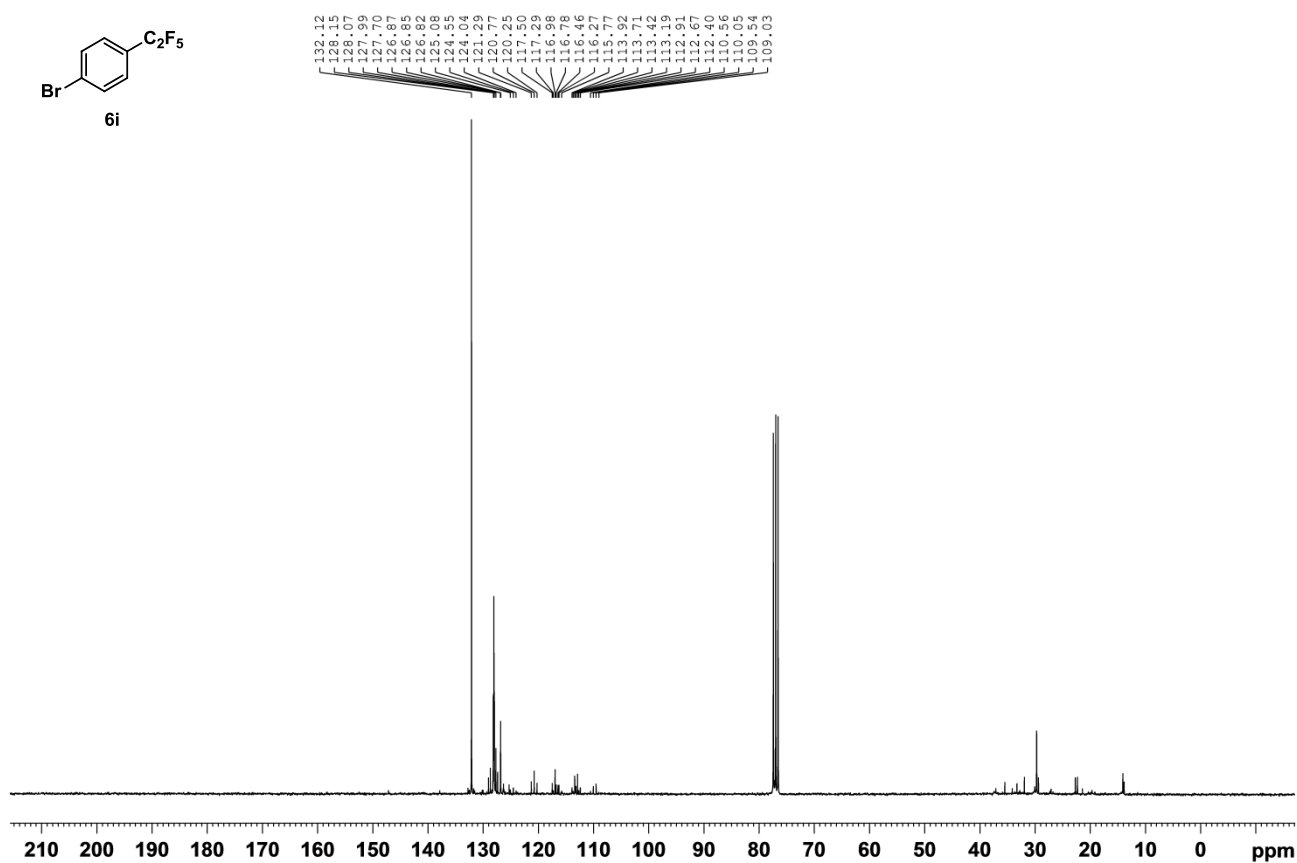

<sup>19</sup>F

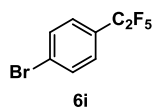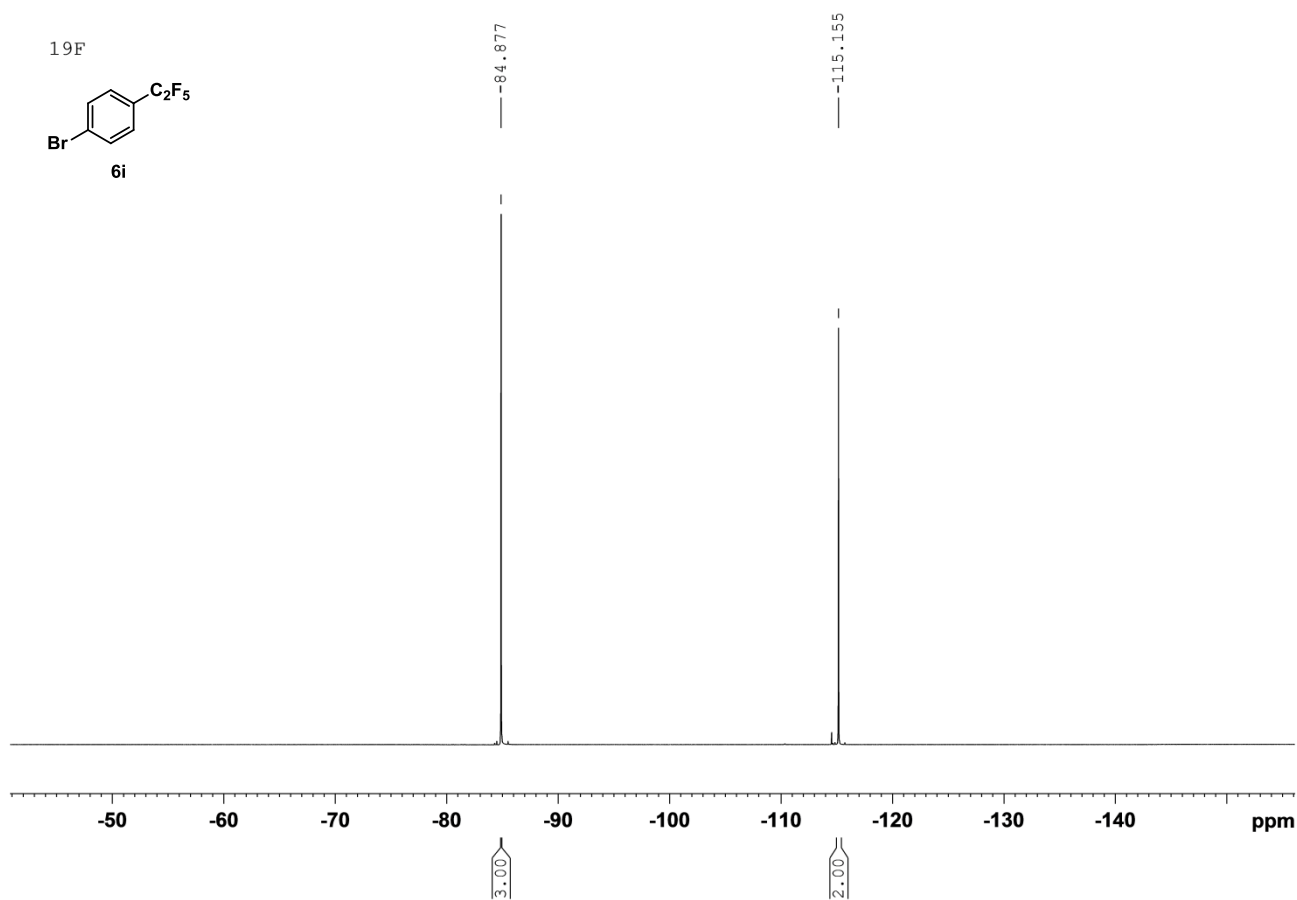

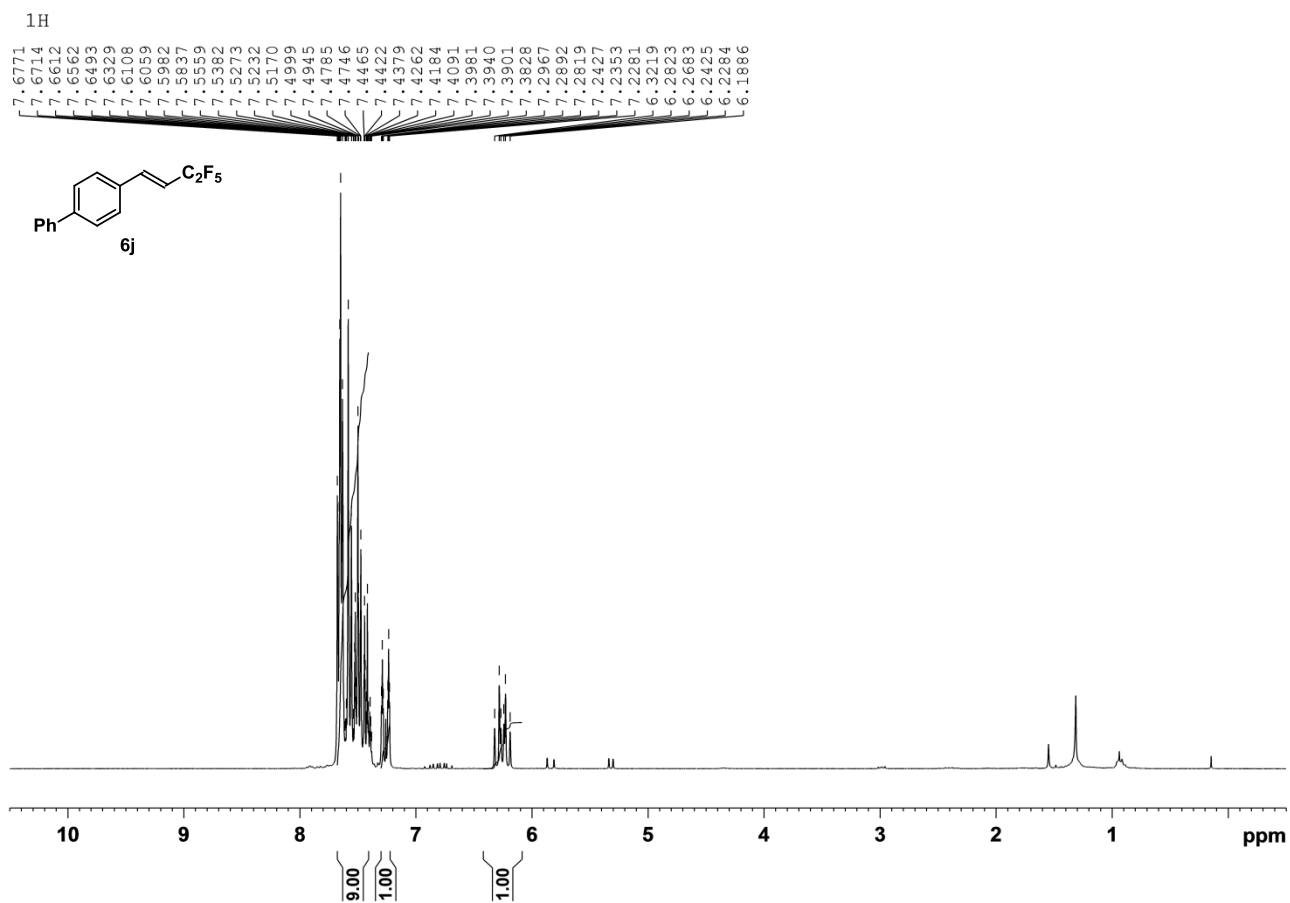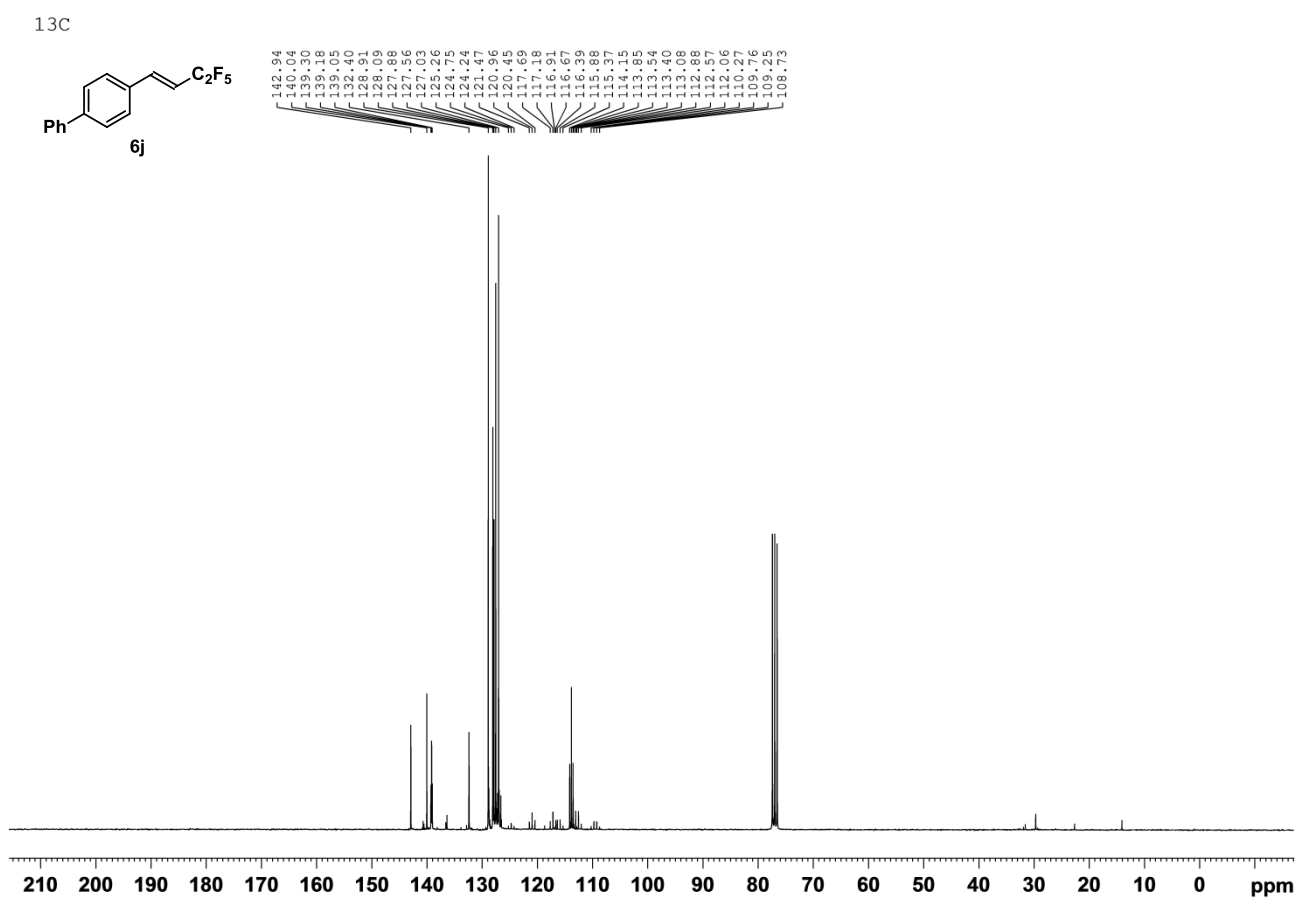



<sup>19</sup>F

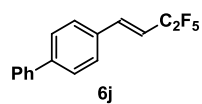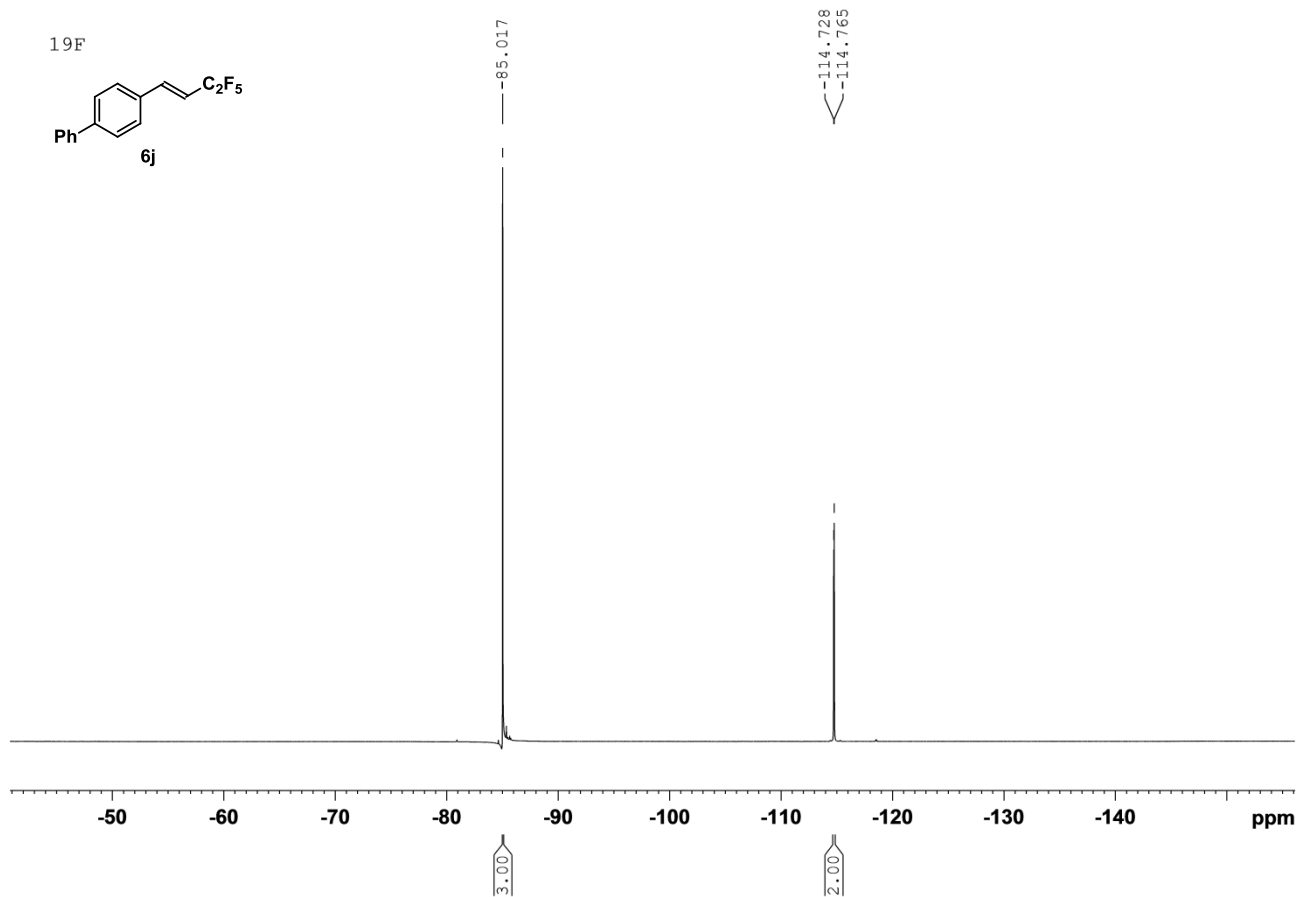

<sup>1</sup>H

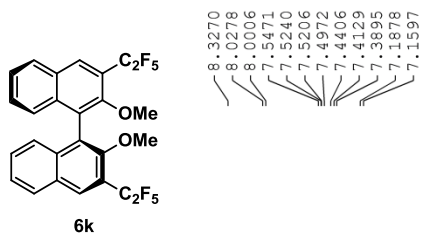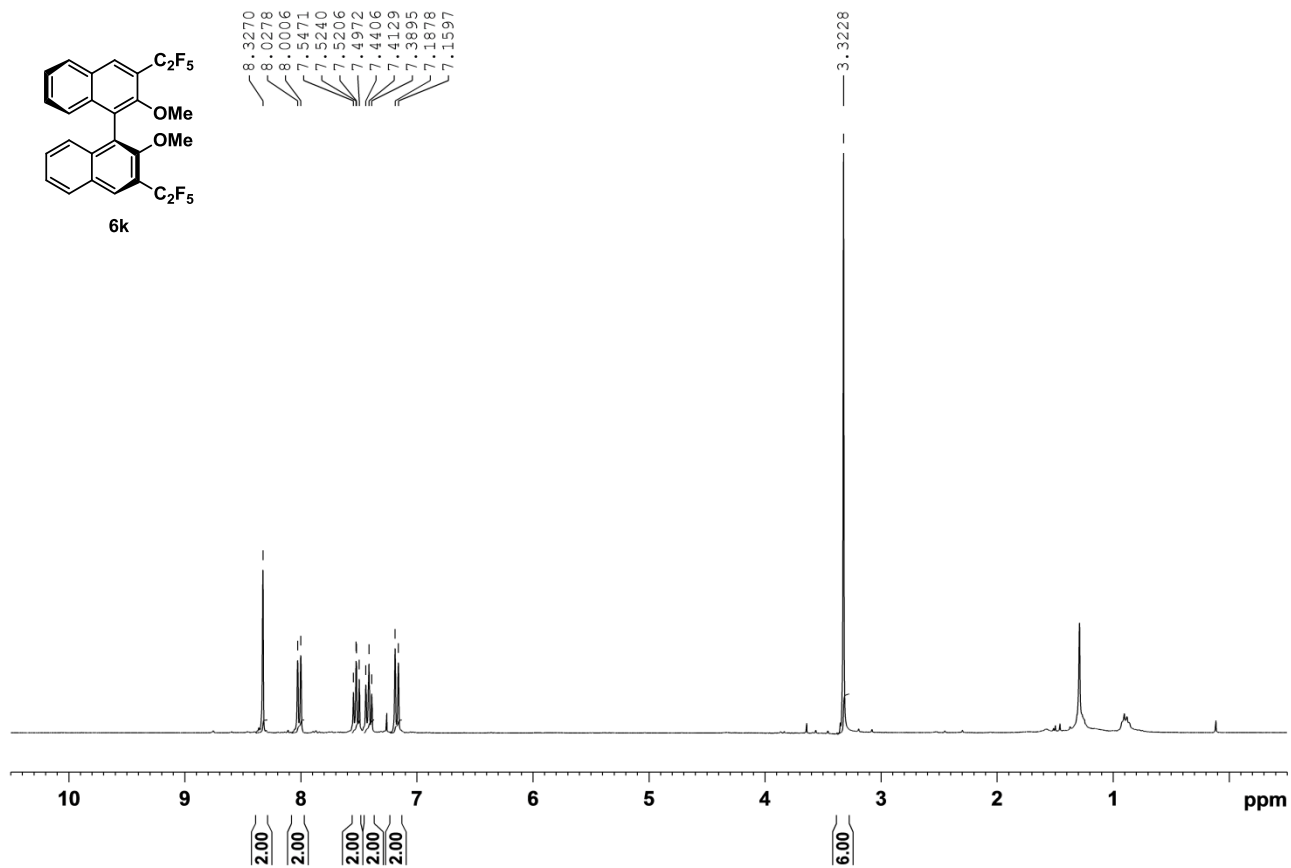

<sup>13</sup>C

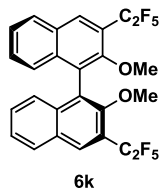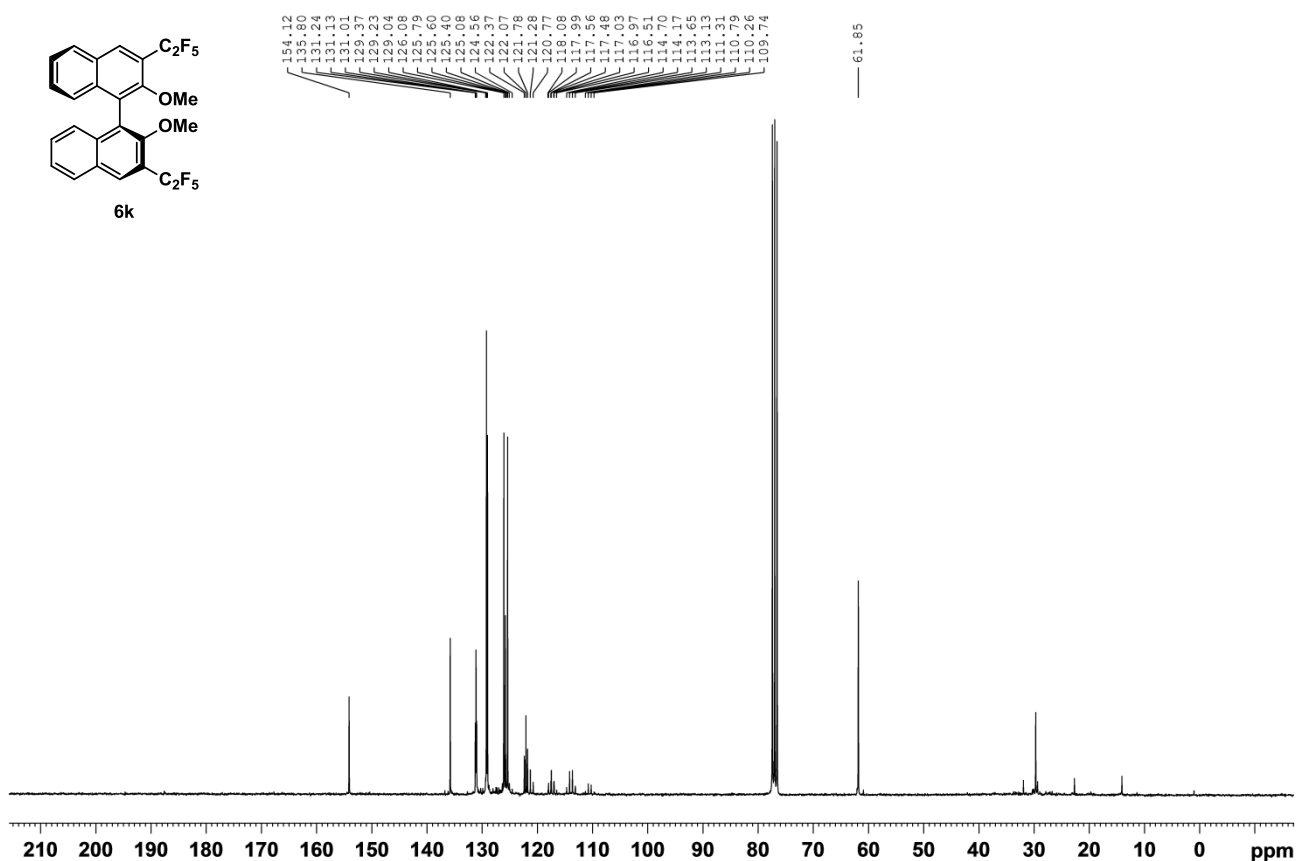

<sup>19</sup>F

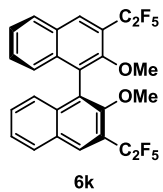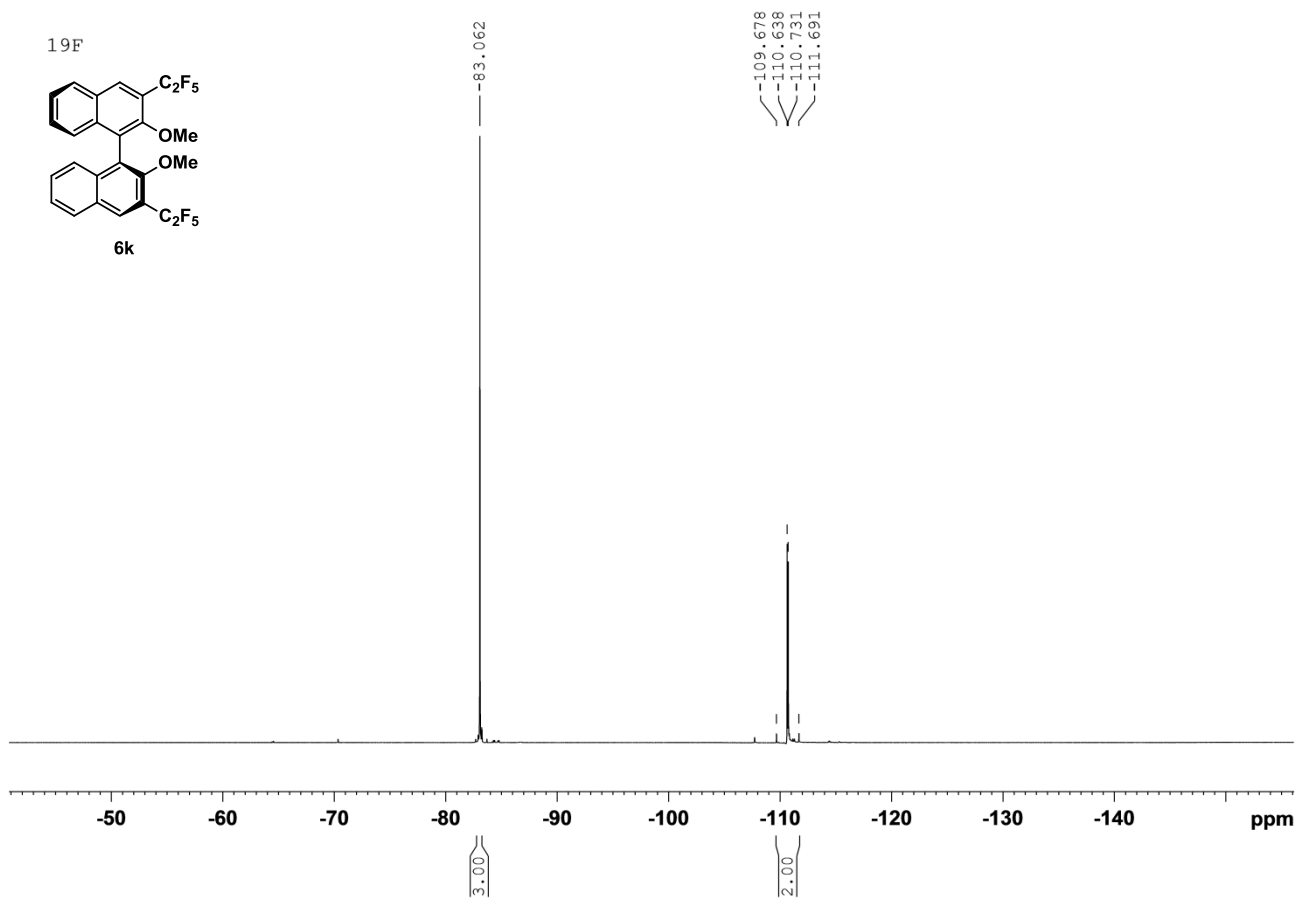

<sup>1</sup>H

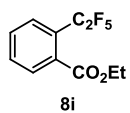

7.6389  
7.6279  
7.6032  
7.5897  
7.5822  
7.5707  
7.5599  
7.5581  
7.5408  
7.5370  
7.5327

4.4107  
4.3868  
4.3630  
4.3392

1.3783  
1.3545  
1.3306

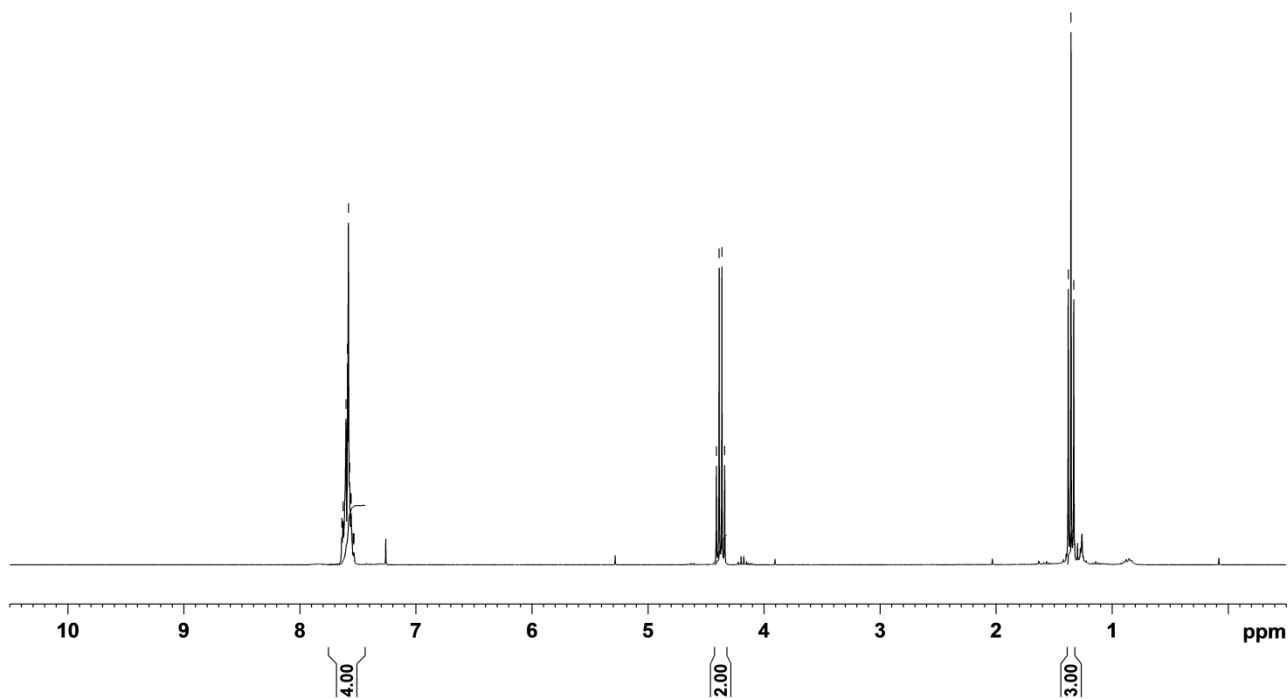

<sup>13</sup>C

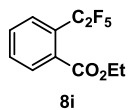

157.80  
157.66  
157.56  
133.51  
133.51  
131.82  
130.13  
129.00  
128.24  
128.14  
128.05  
126.20  
126.19  
125.89  
125.78  
125.16  
124.67  
124.16  
121.38  
120.87  
120.35  
120.35  
117.77  
117.58  
117.25  
117.06  
116.55  
116.55  
116.22  
114.39  
113.87  
113.78  
113.35  
113.26  
112.83  
112.75  
111.00  
110.48  
109.97  
109.45

62.05

13.77

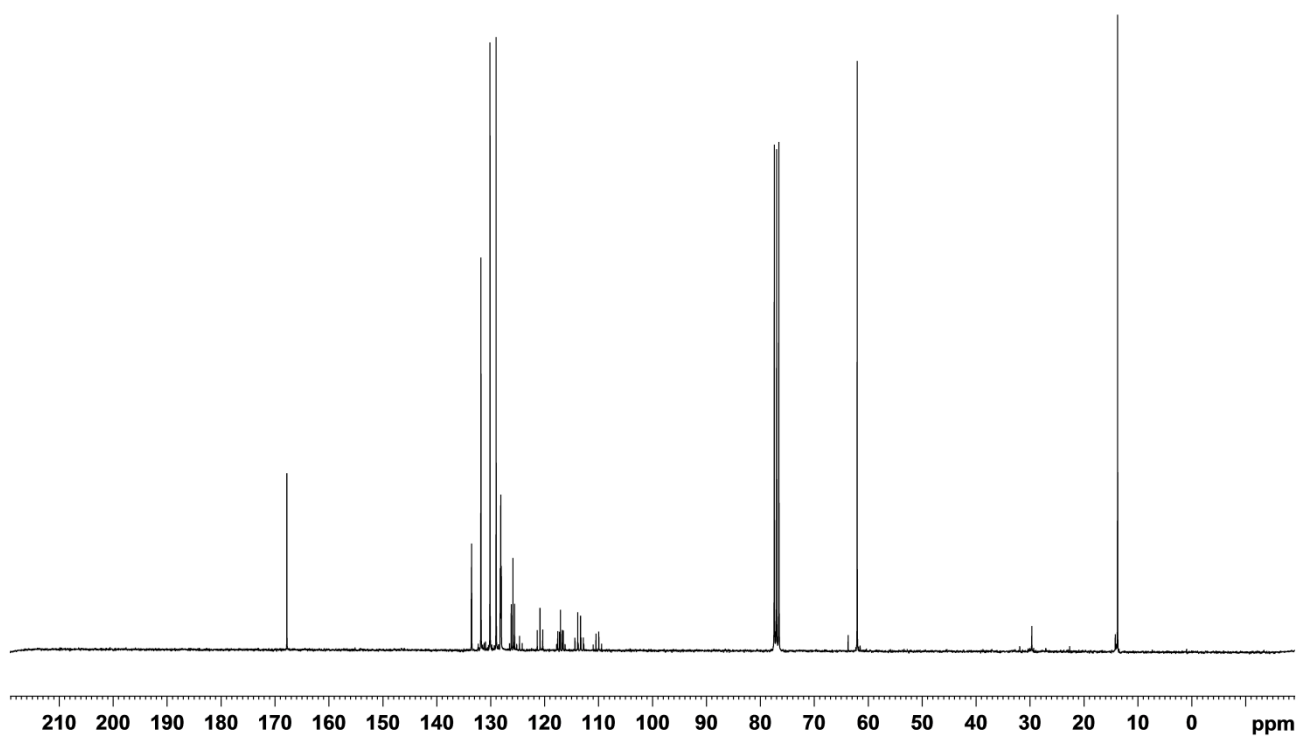

<sup>19</sup>F

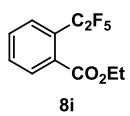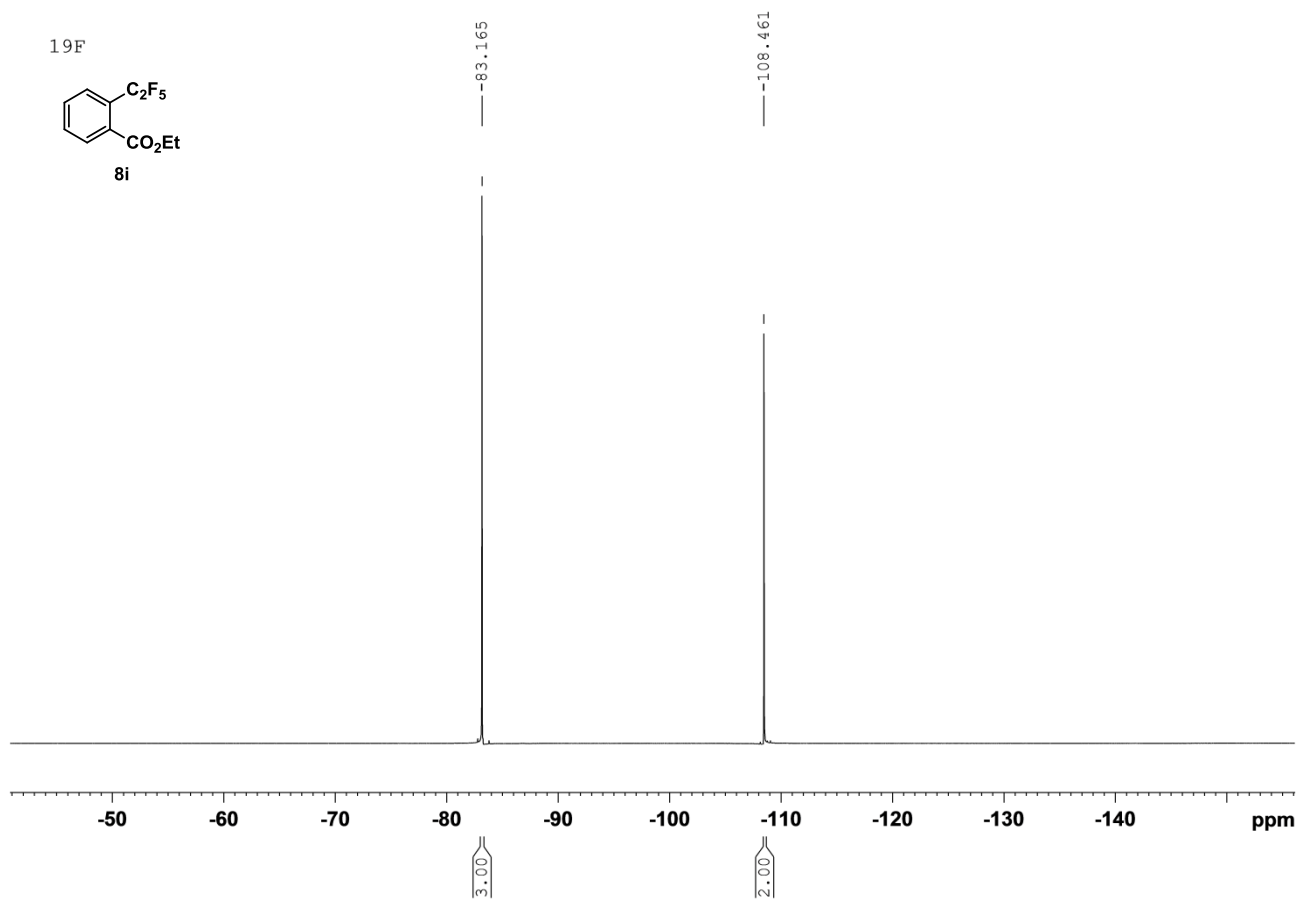

<sup>1</sup>H

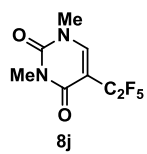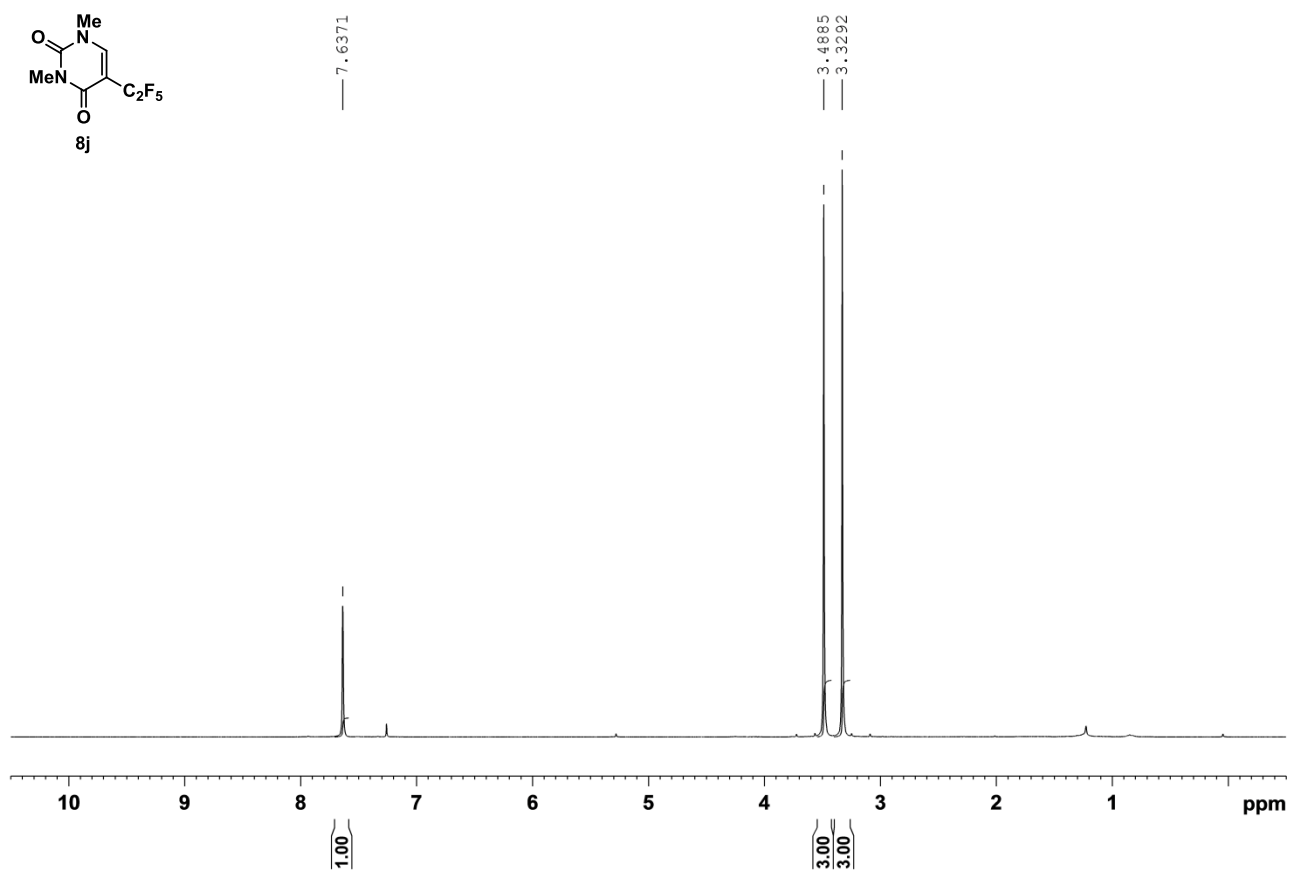

<sup>13</sup>C

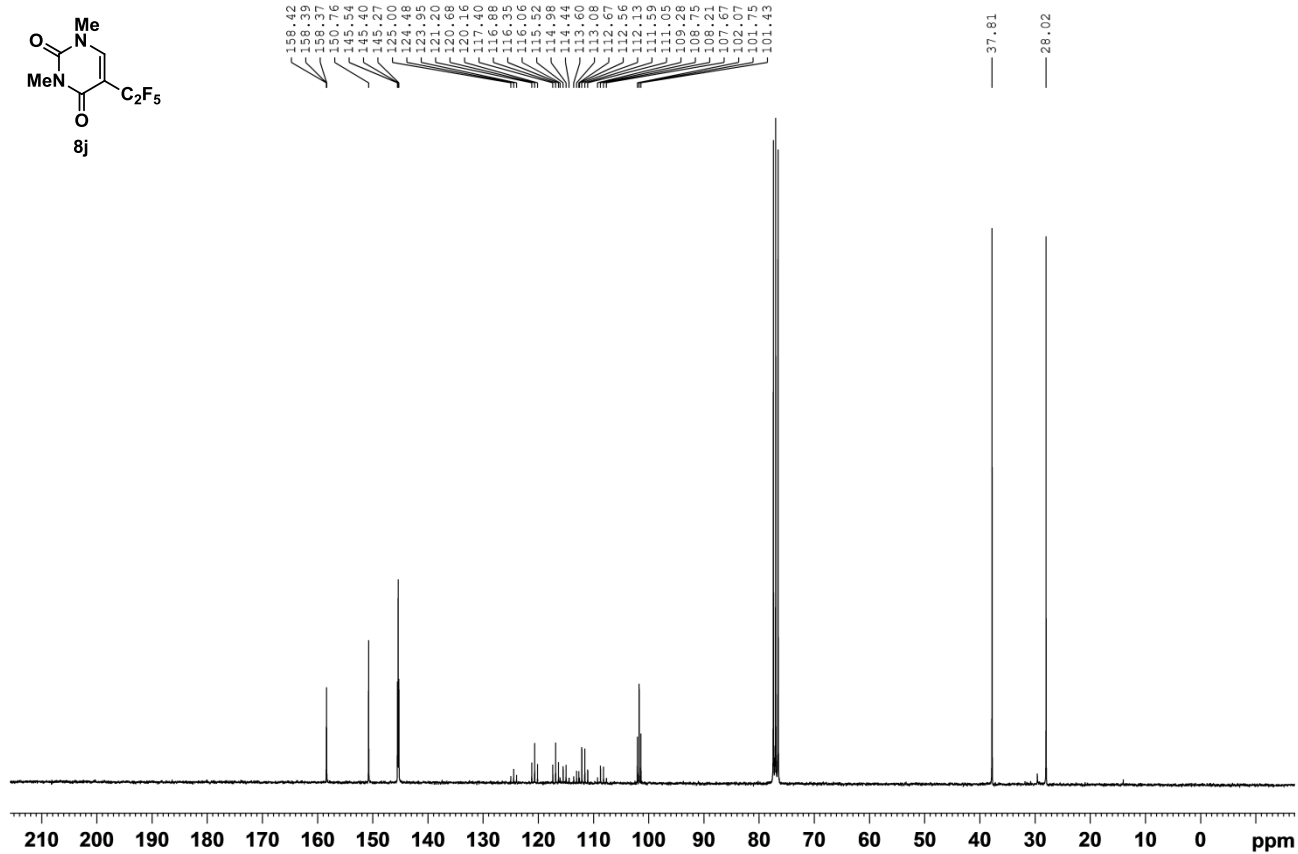

<sup>19</sup>F

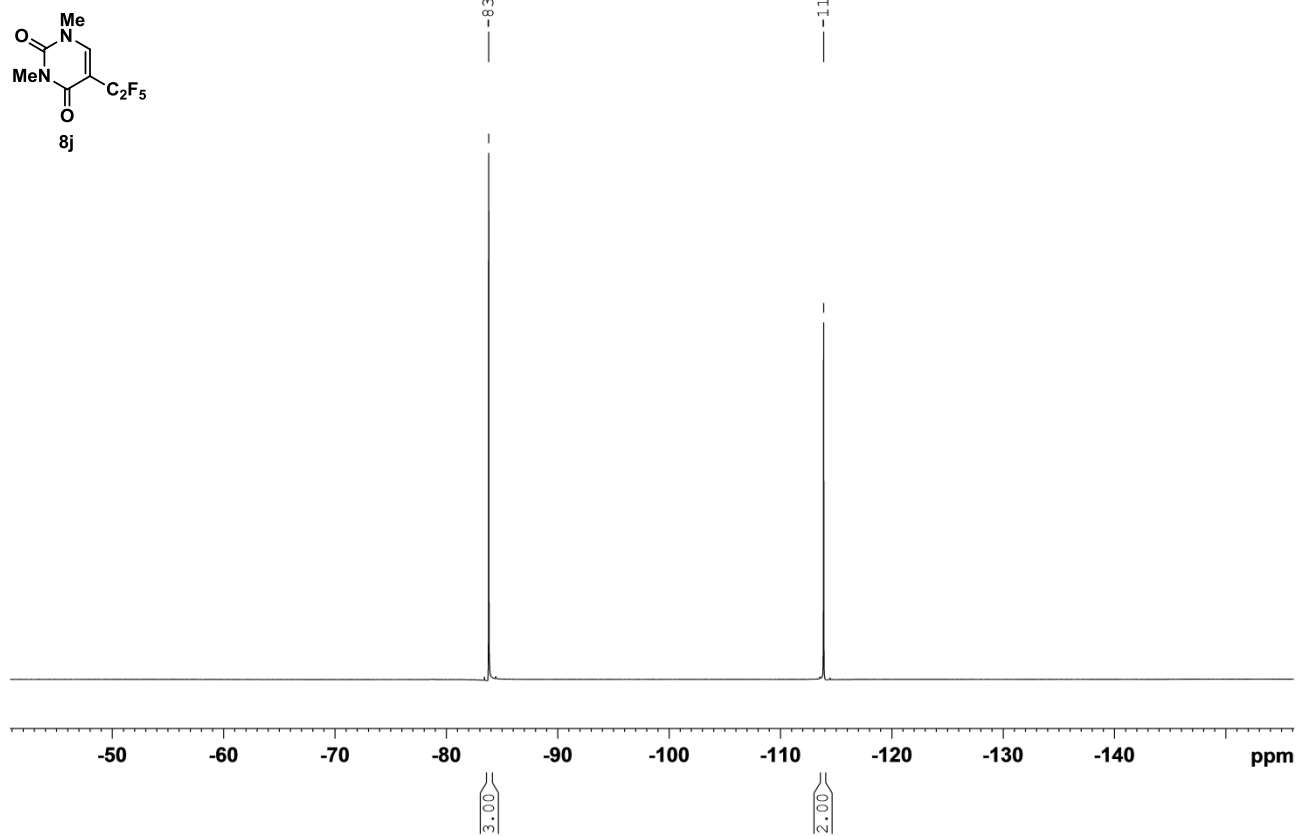

<sup>1</sup>H

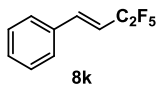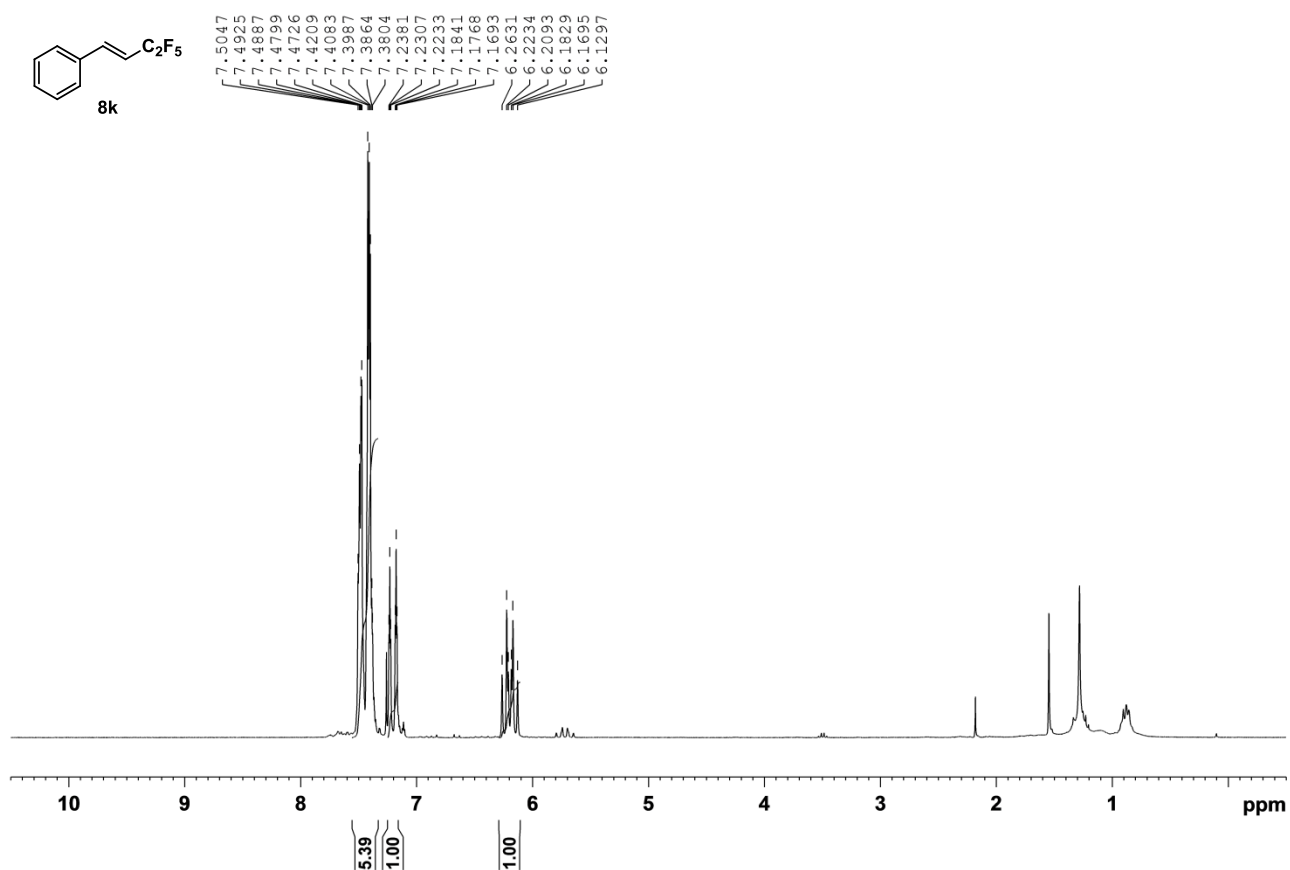

<sup>13</sup>C

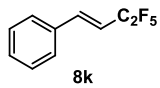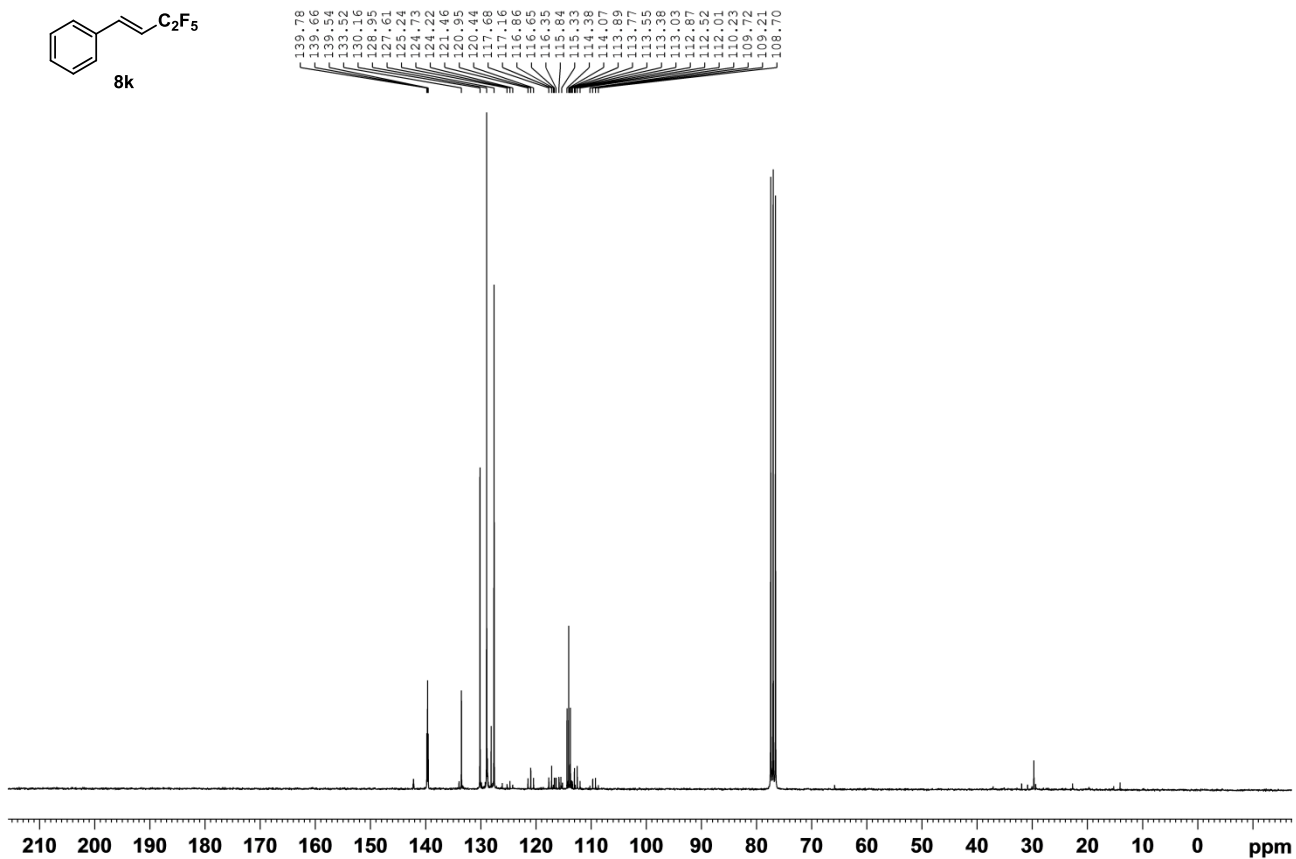

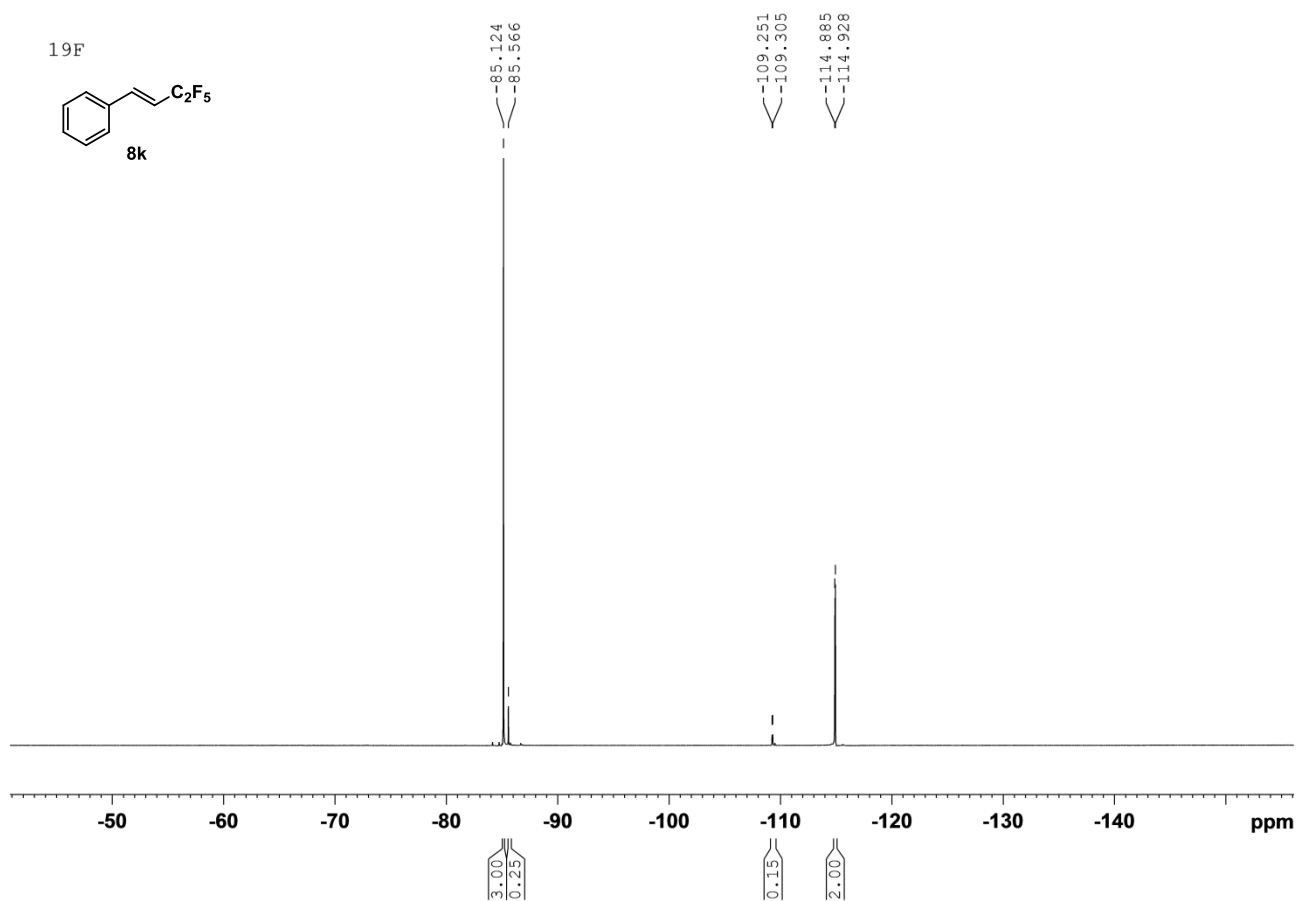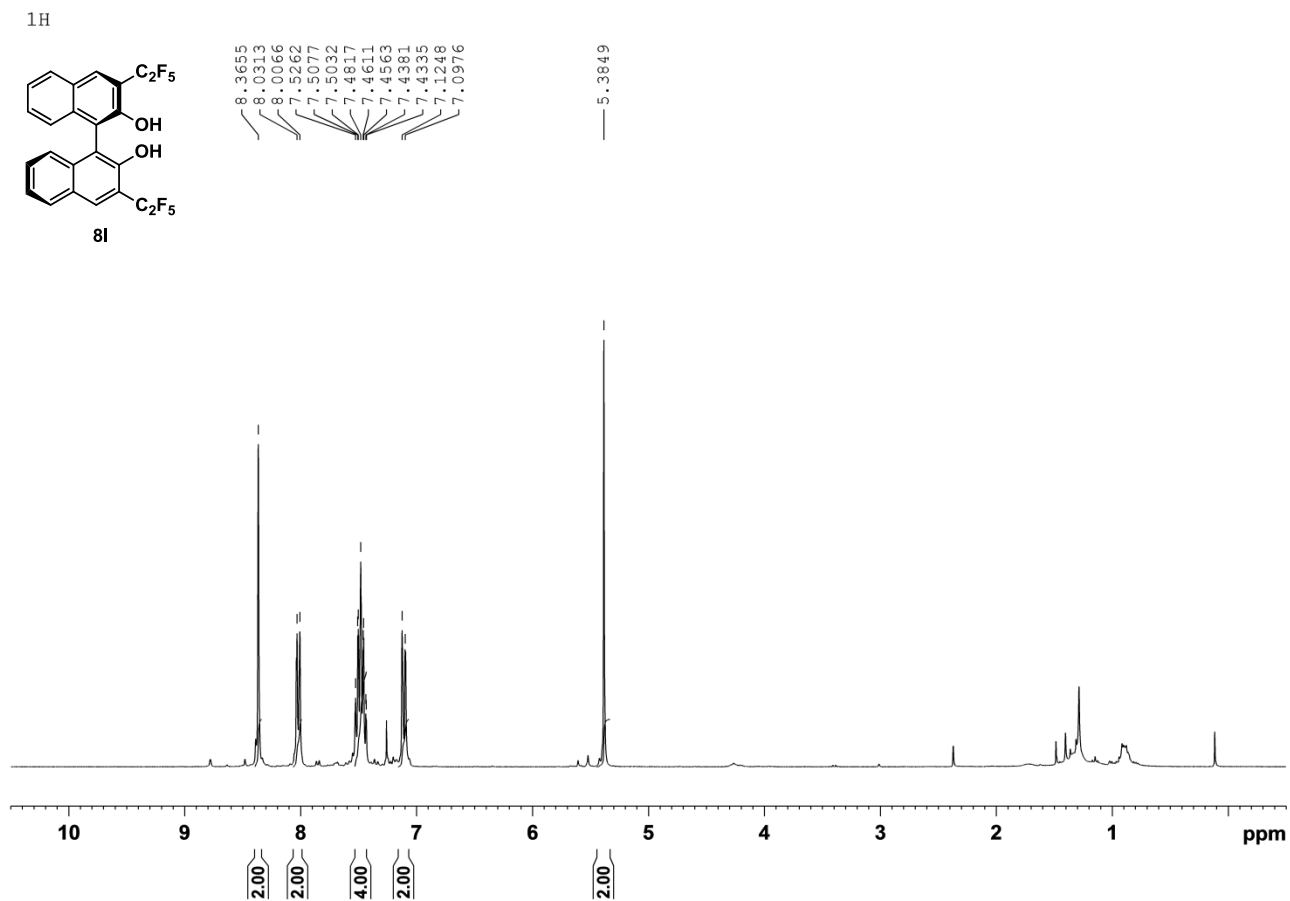

<sup>13</sup>C

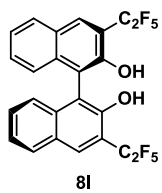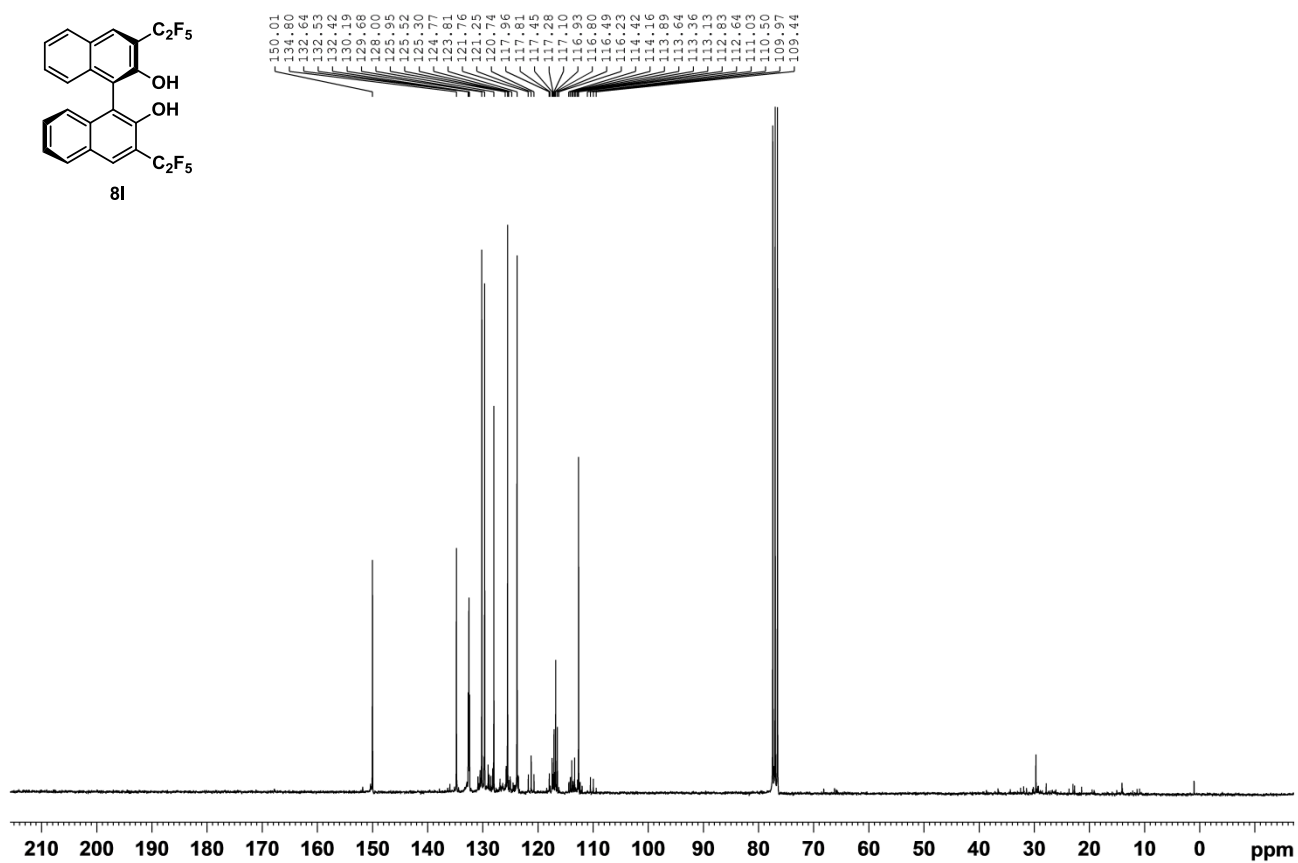

<sup>19</sup>F

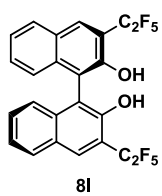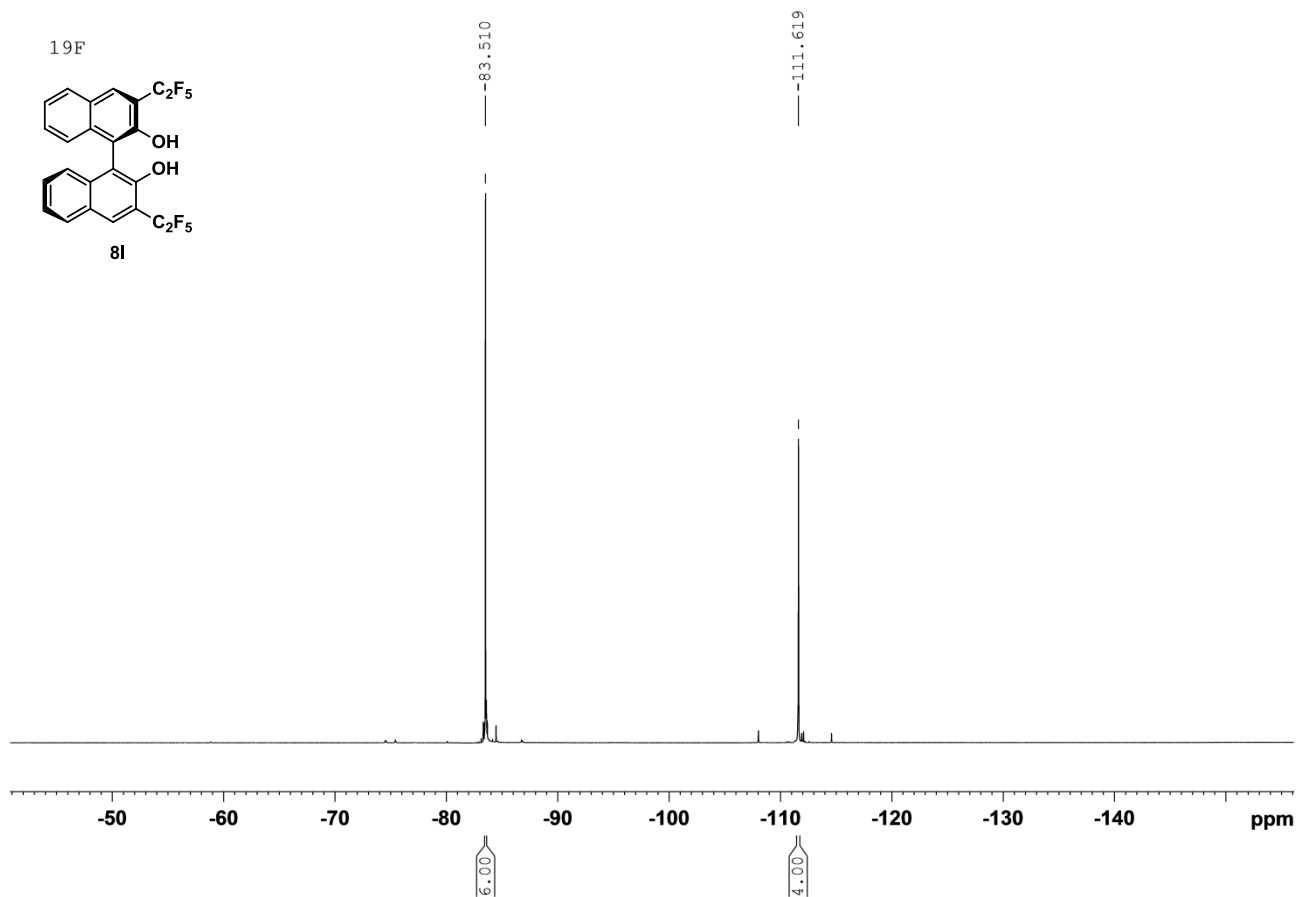

Supplement: Supplementary file 1 [file 3914158]
